# Supplementary material for: The activist health sciences librarian
Source: PubMed Central journal article supplement (PMC6920003; doi:10.5195/jmla.2020.859), 2020-01-01
Supplement: jmla-108-5-s001.pdf [file jmla-108-5-s001.pdf]

# "The Activist Health Sciences Librarian"

Jerry Perry, MLS, AHIP, FMLA  
*Janet Doe Lecturer*

May 6, 2019

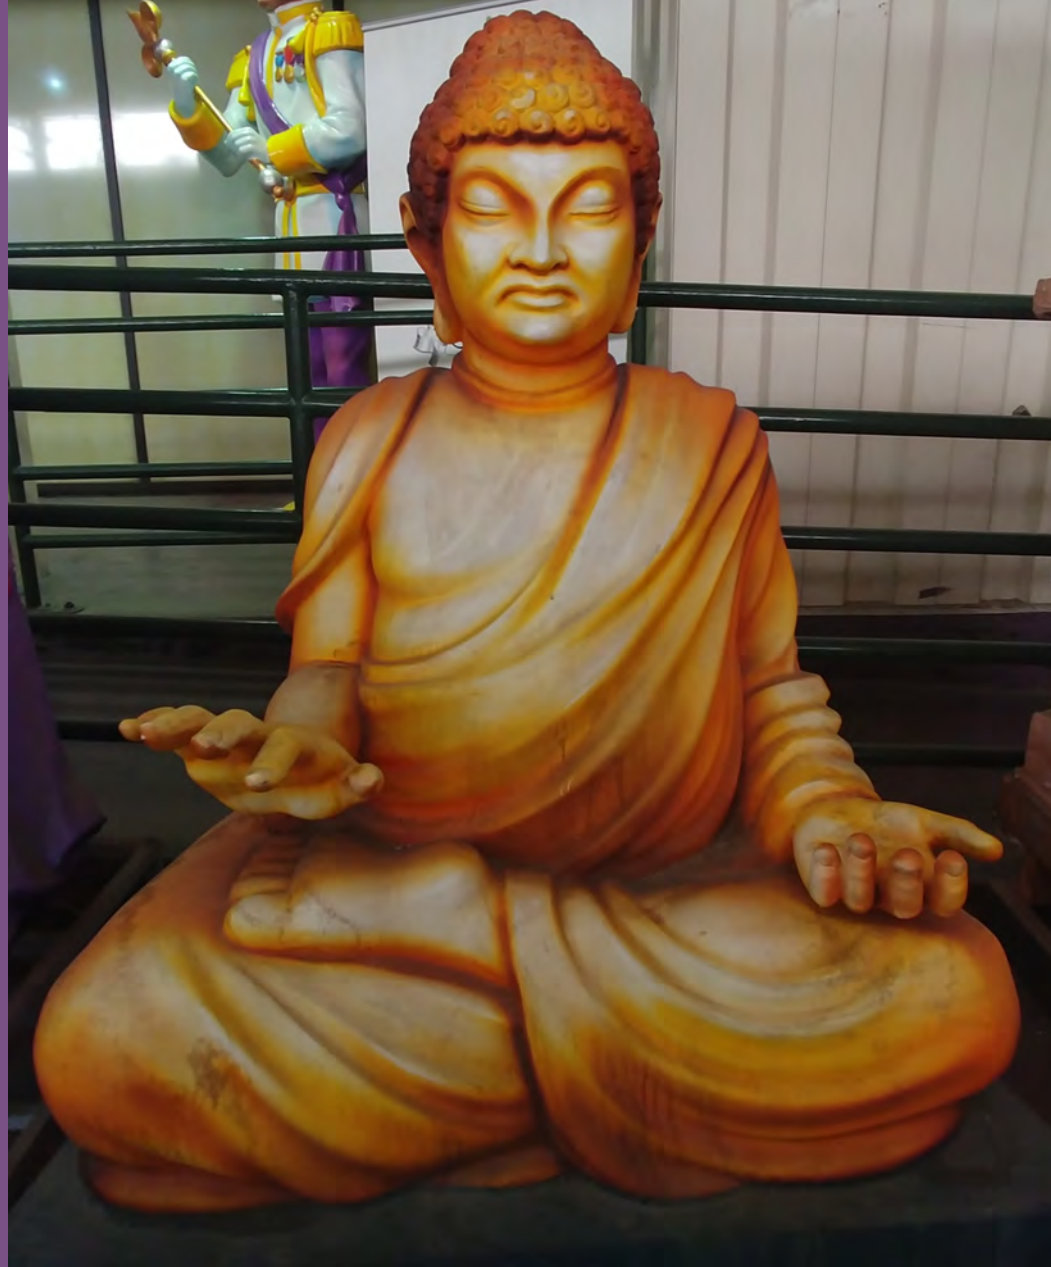

Buddha float, Mardi Gras World, New Orleans



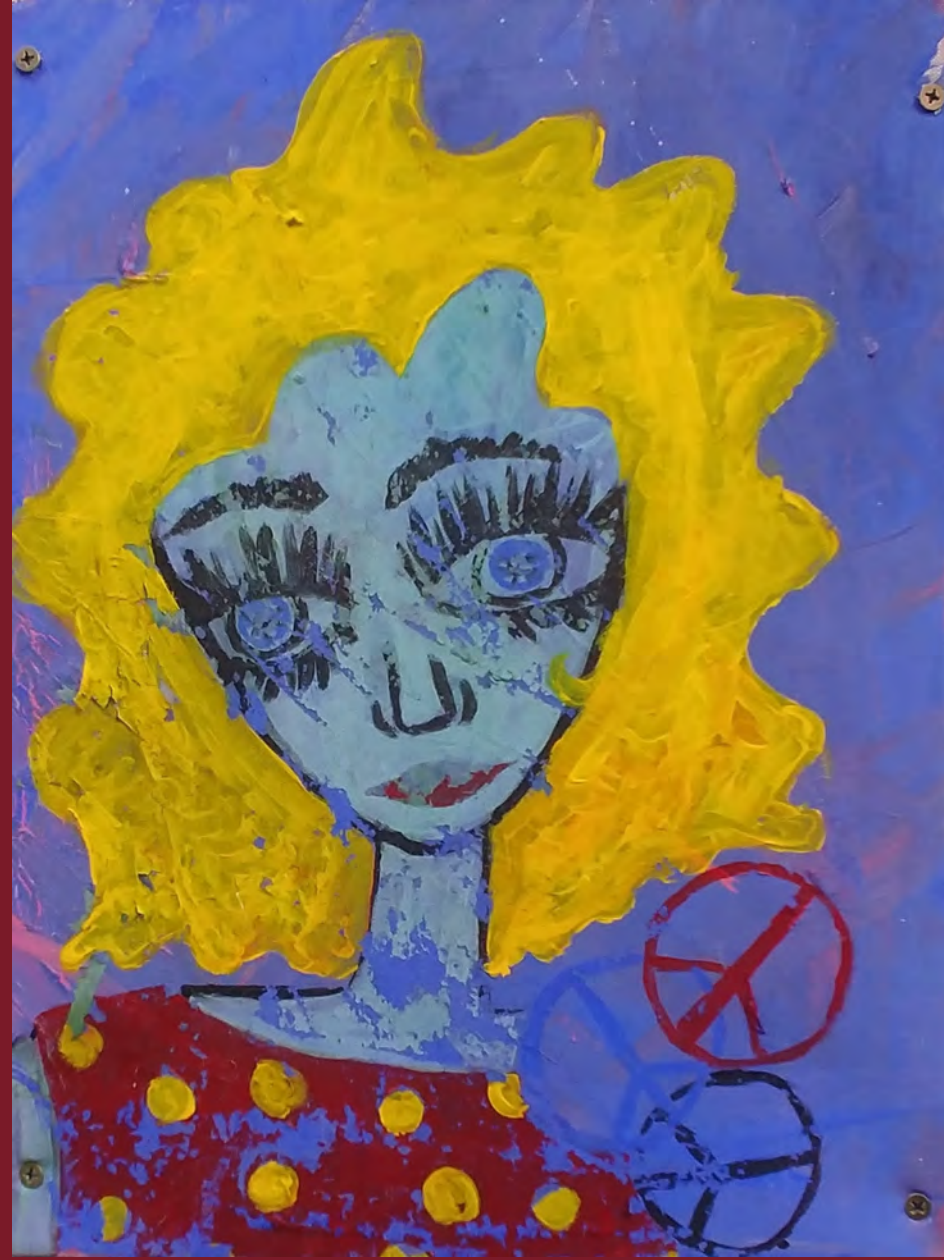

Street art, Bisbee, Arizona

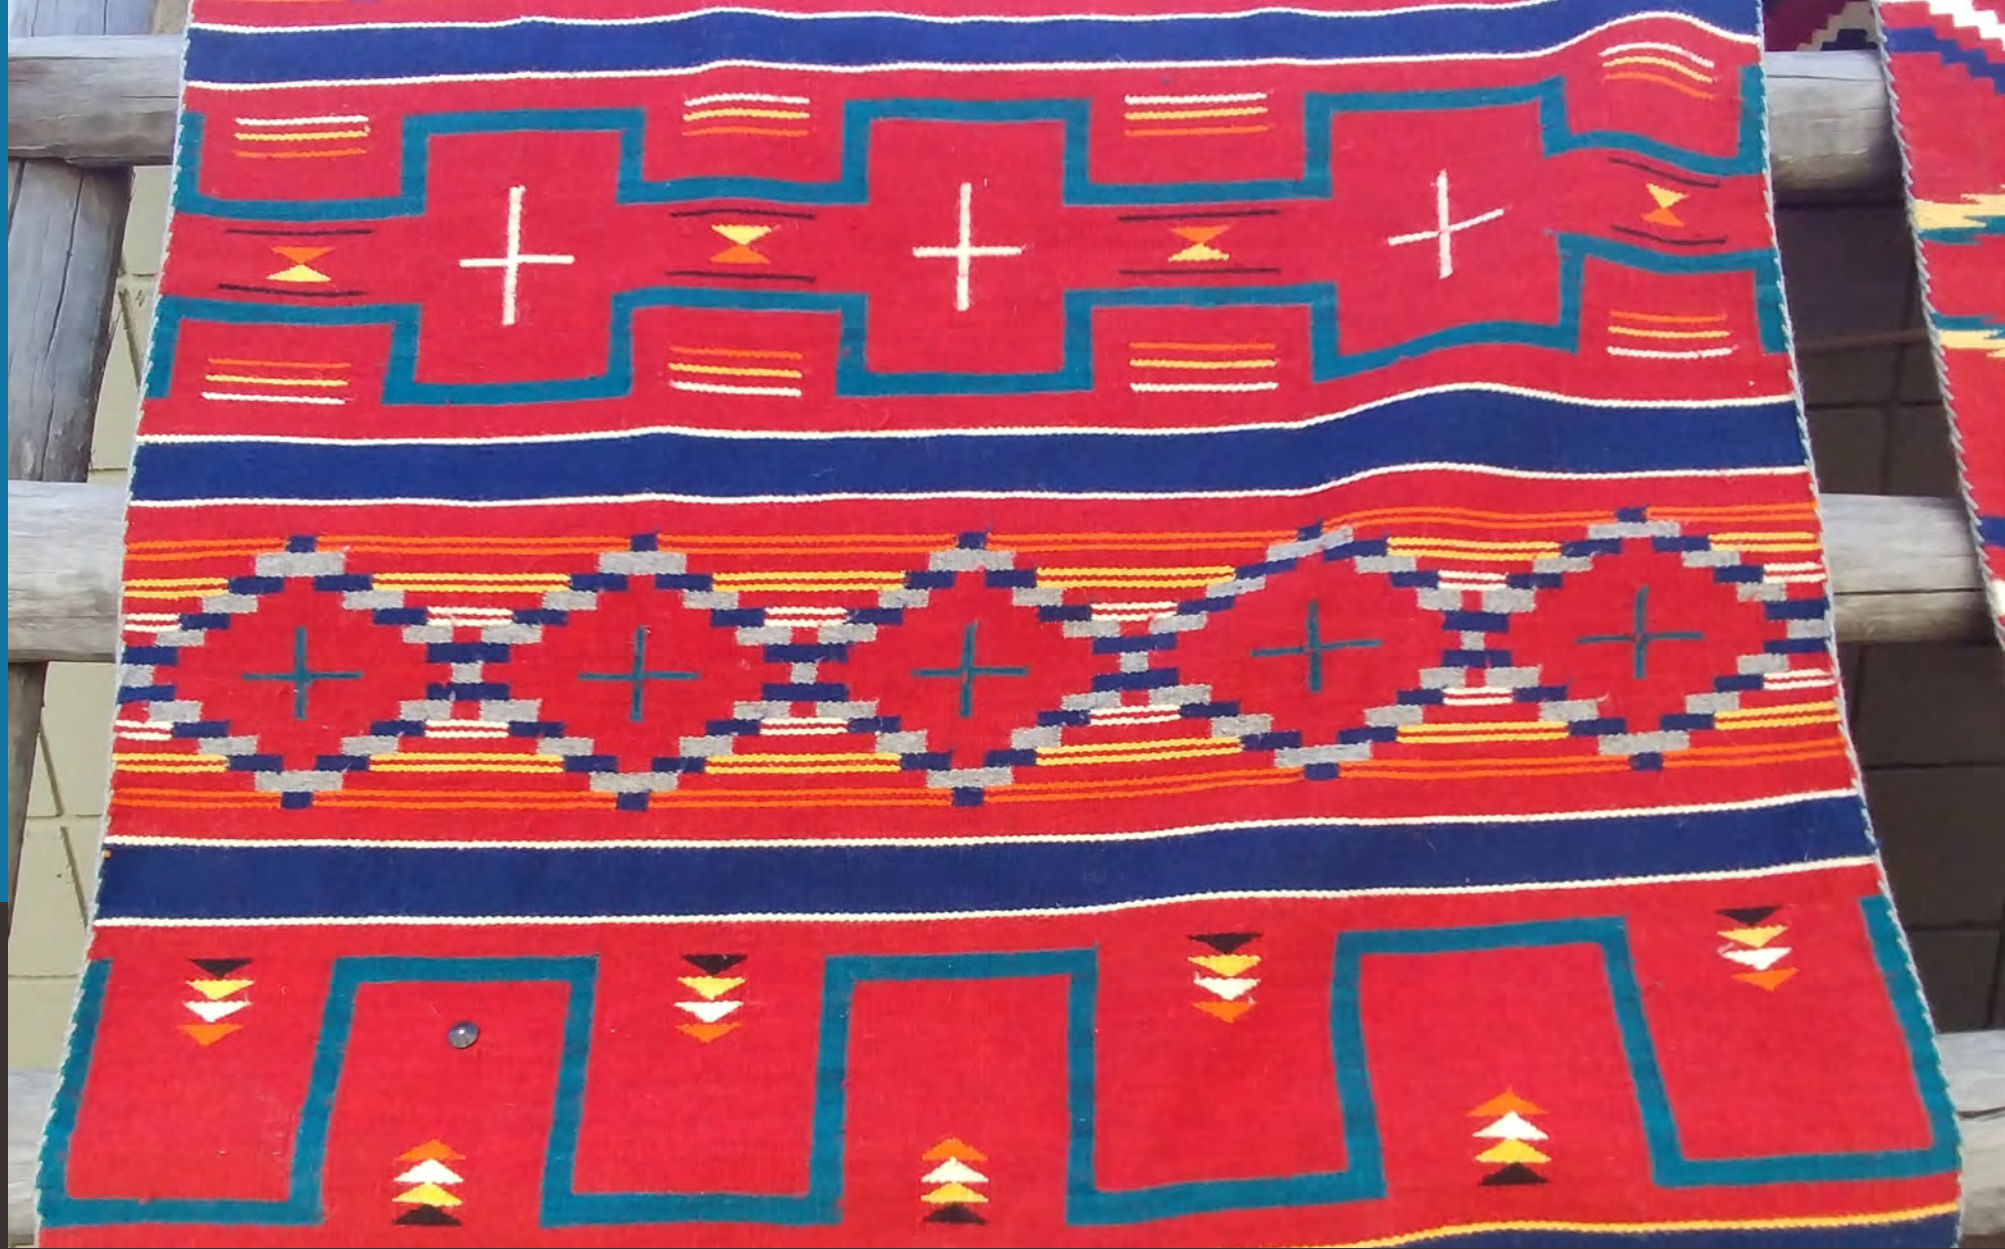

Contemporary Navajo blanket



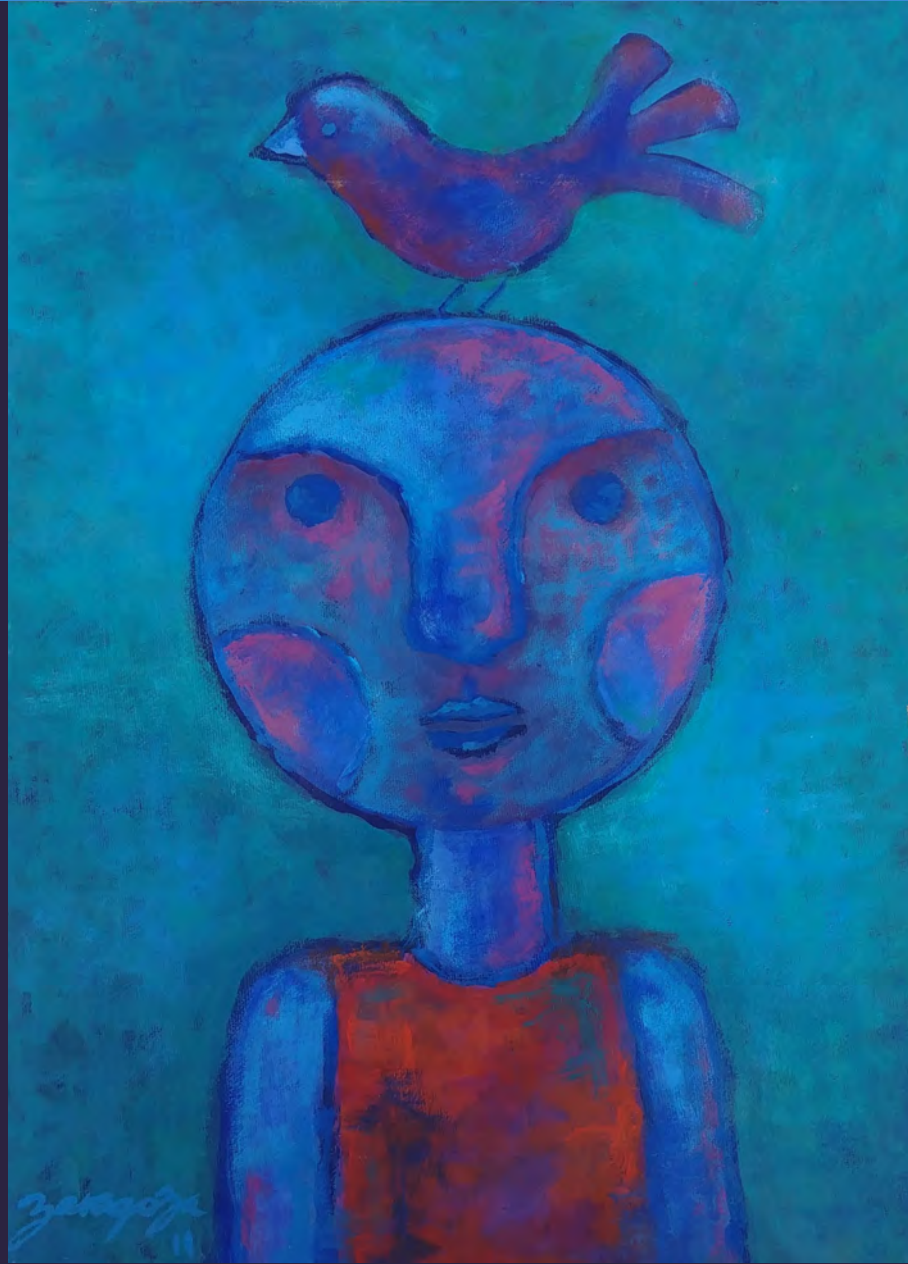

Thrift shop art, unknown Mexican artist

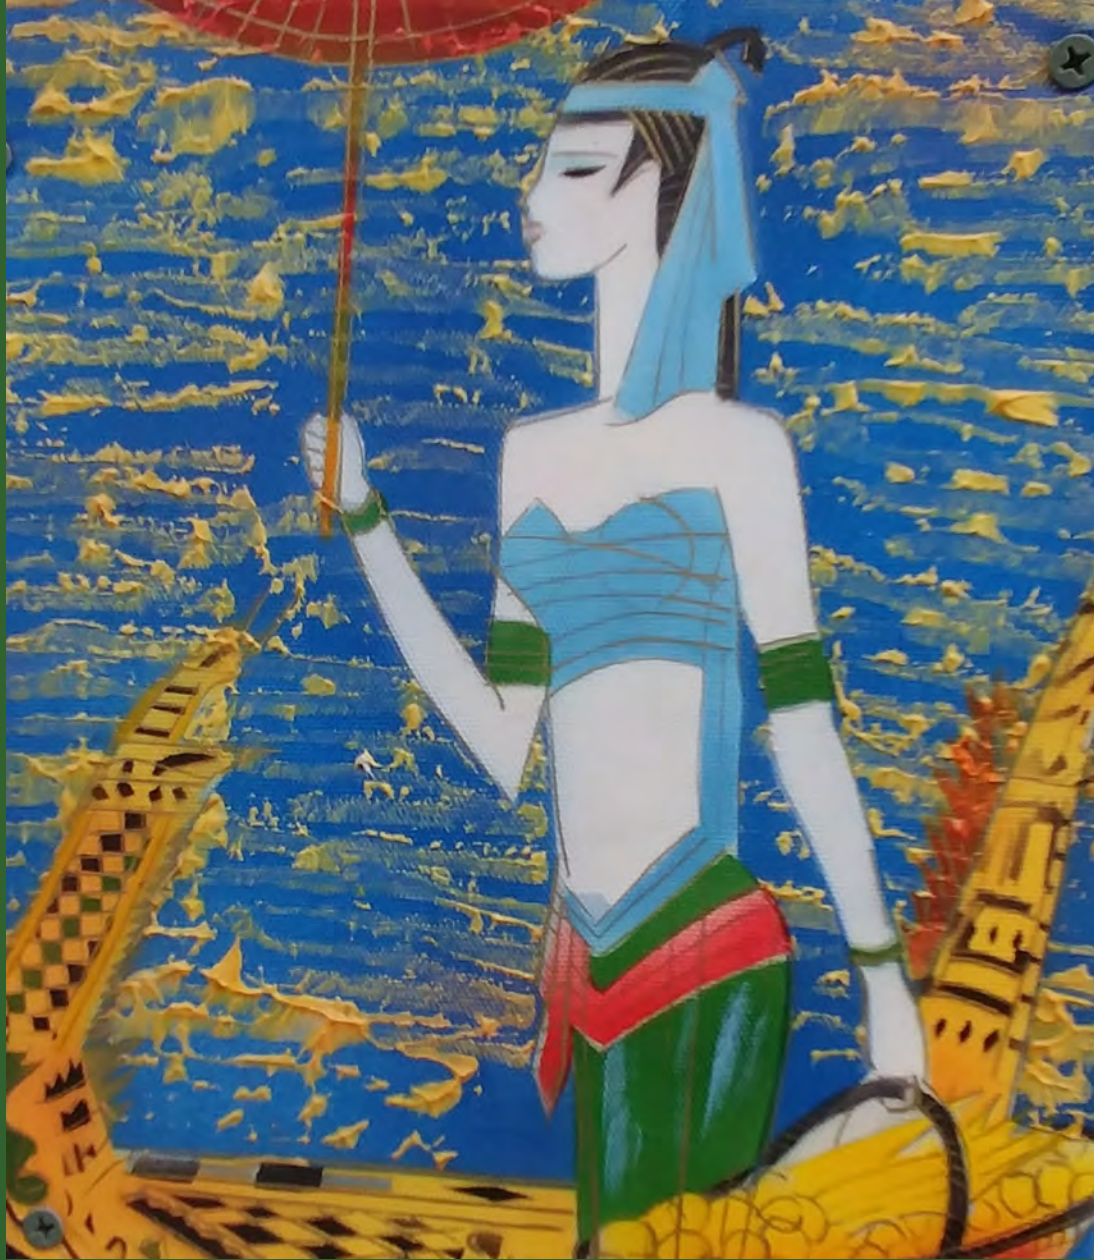

Street art, Bisbee, Arizona

# AUDRE LORDE

Your Silence Will Not  
Protect You

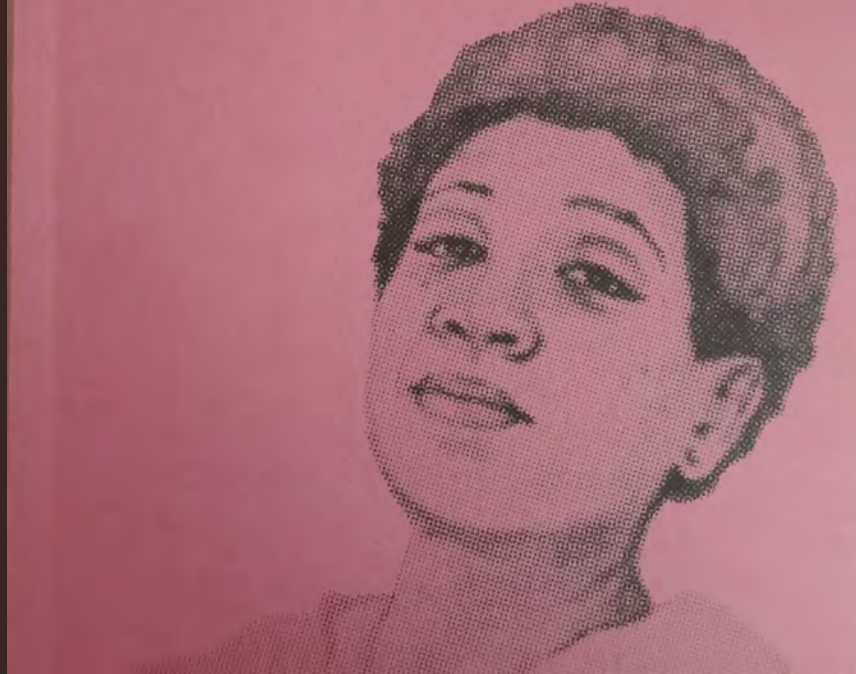

Audre Lorde, *Your Silence Will Not Protect You*.  
London, UK: Silver Press; 2017



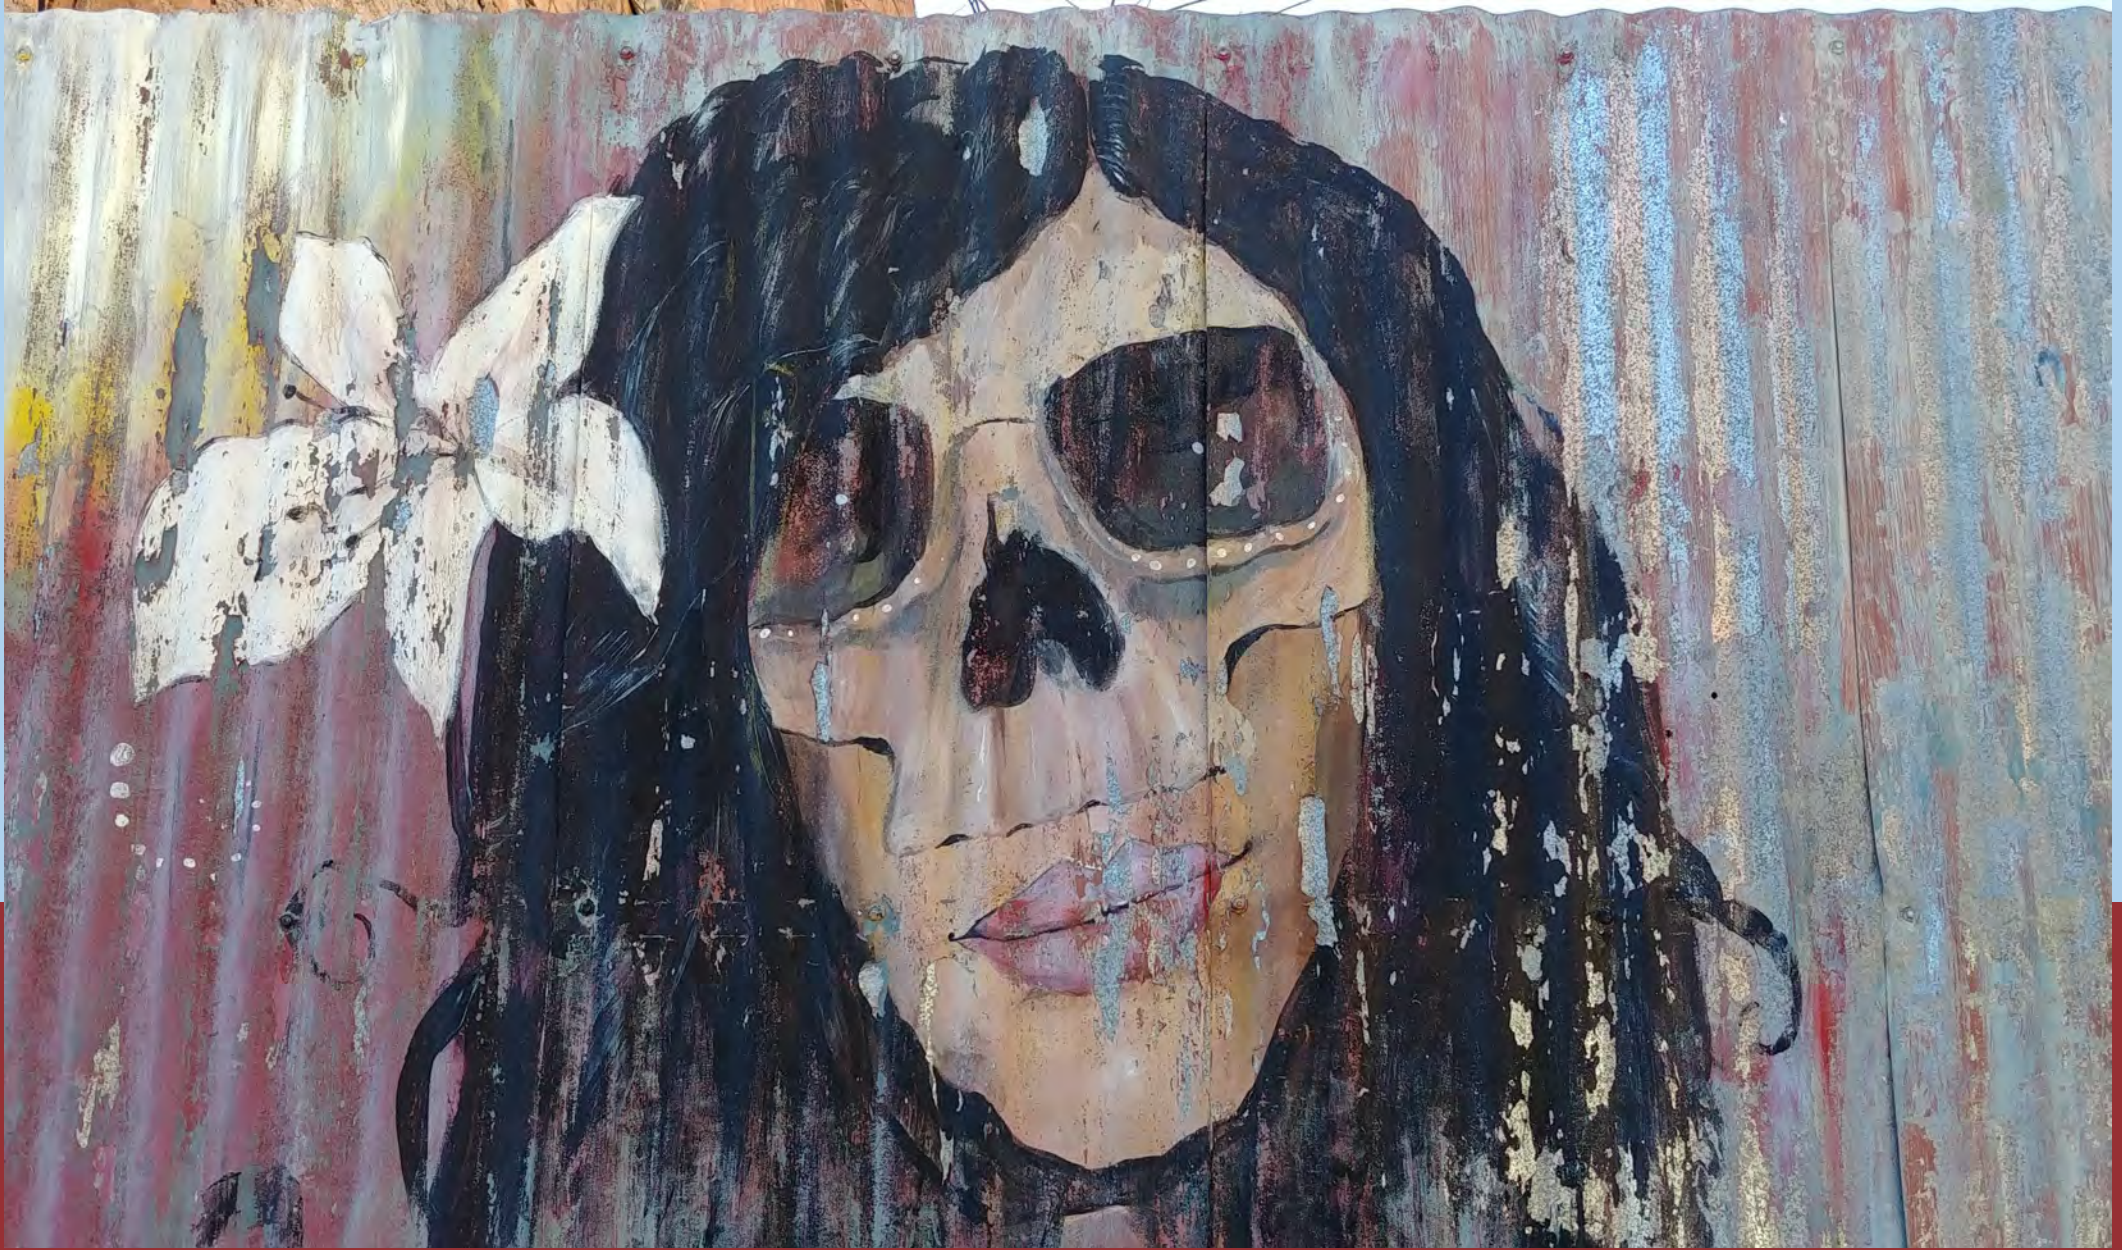

Skeleton woman, Bisbee, Arizona



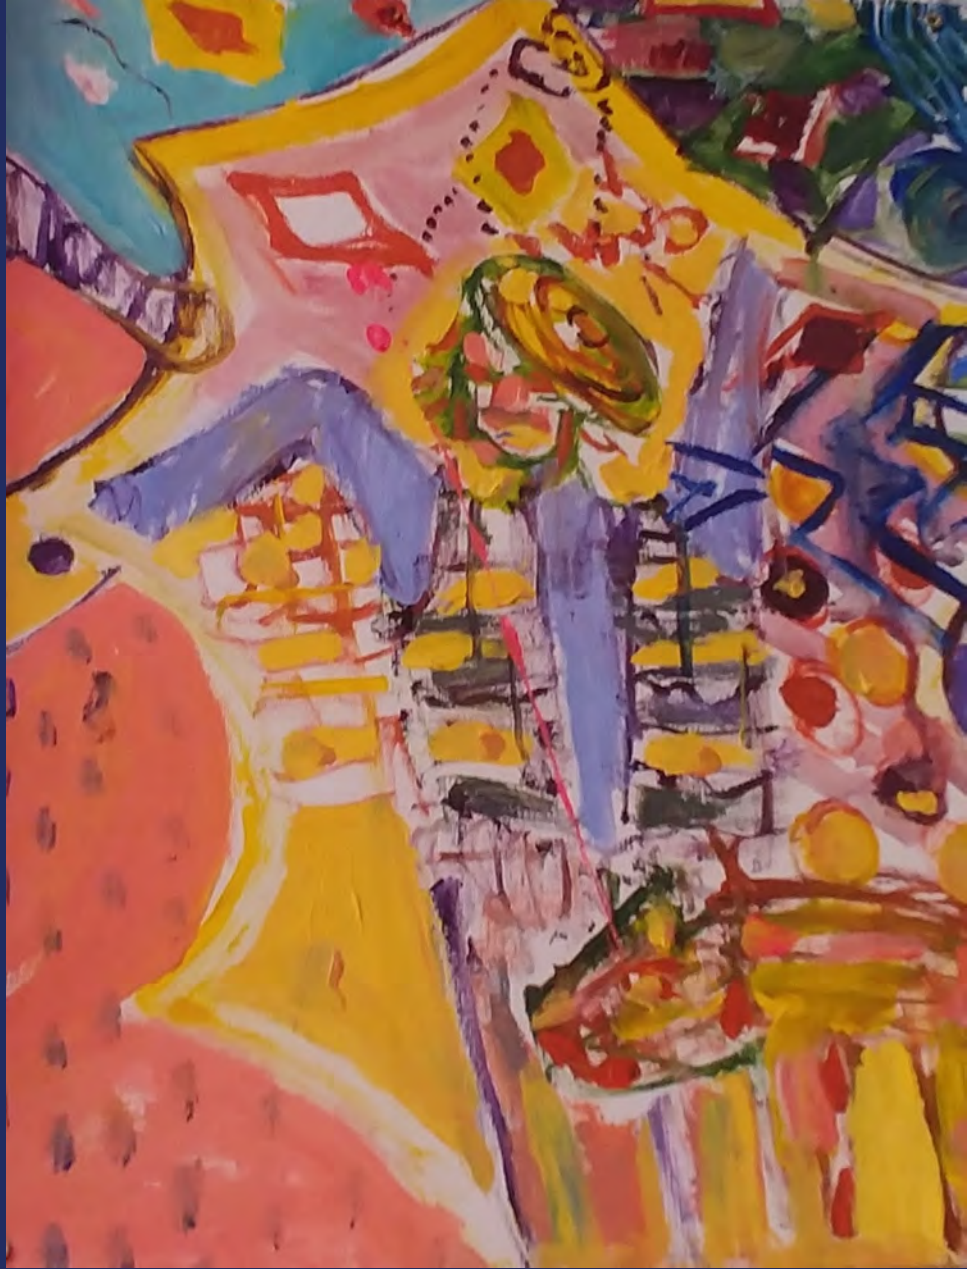

Street art, Bisbee, Arizona

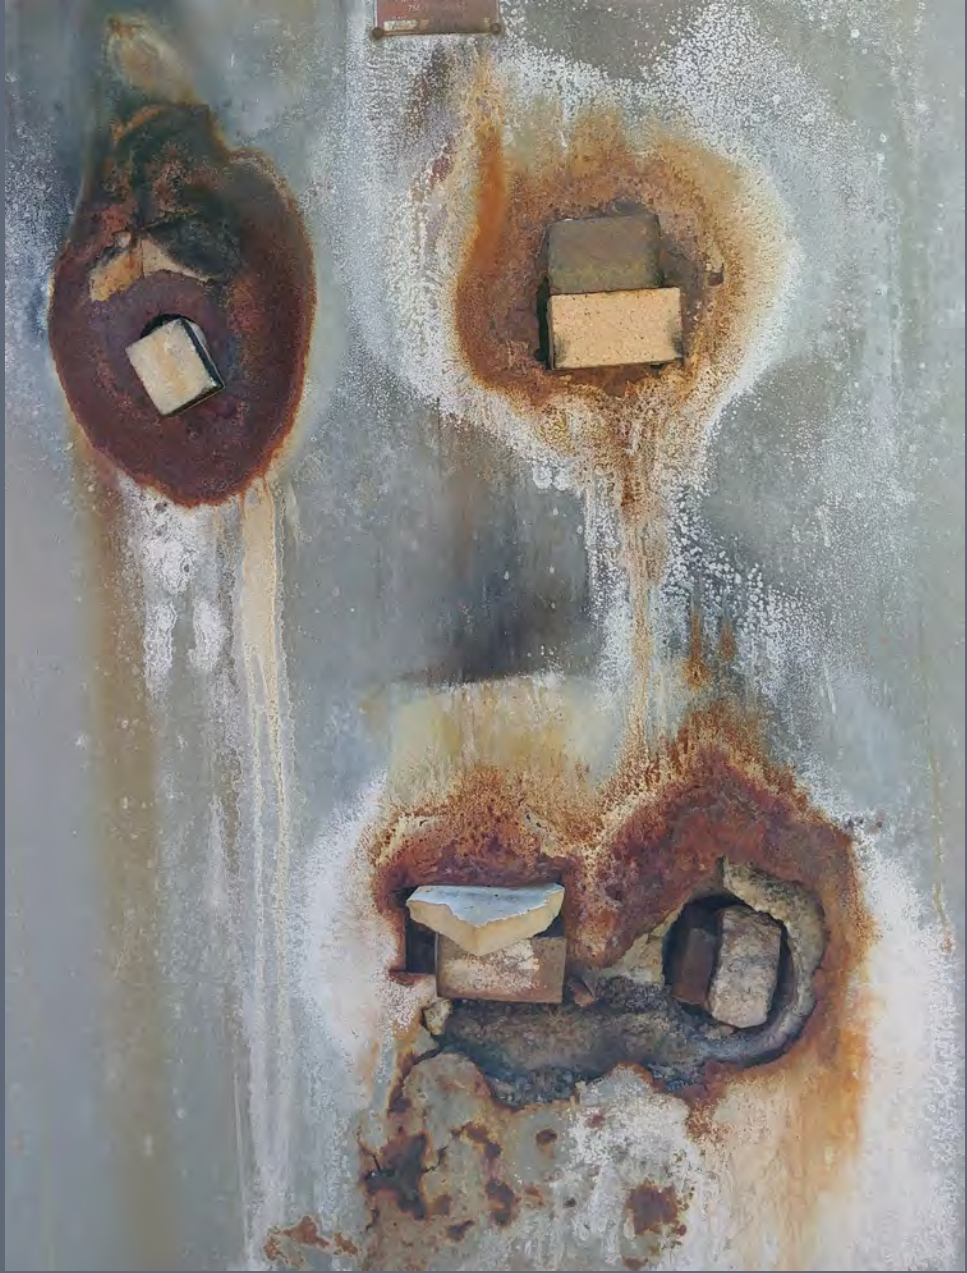

Rust, Scottsdale, Arizona



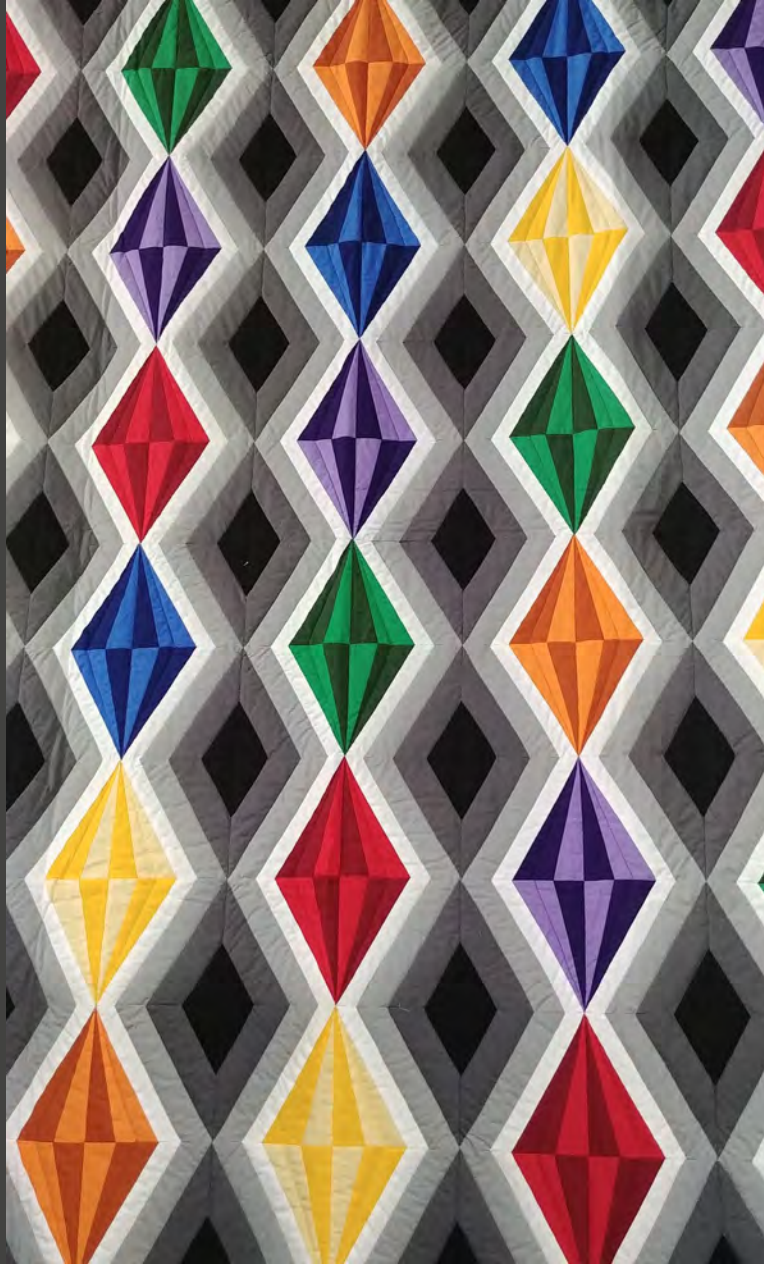

Quilt, Arizona State Fair 2018



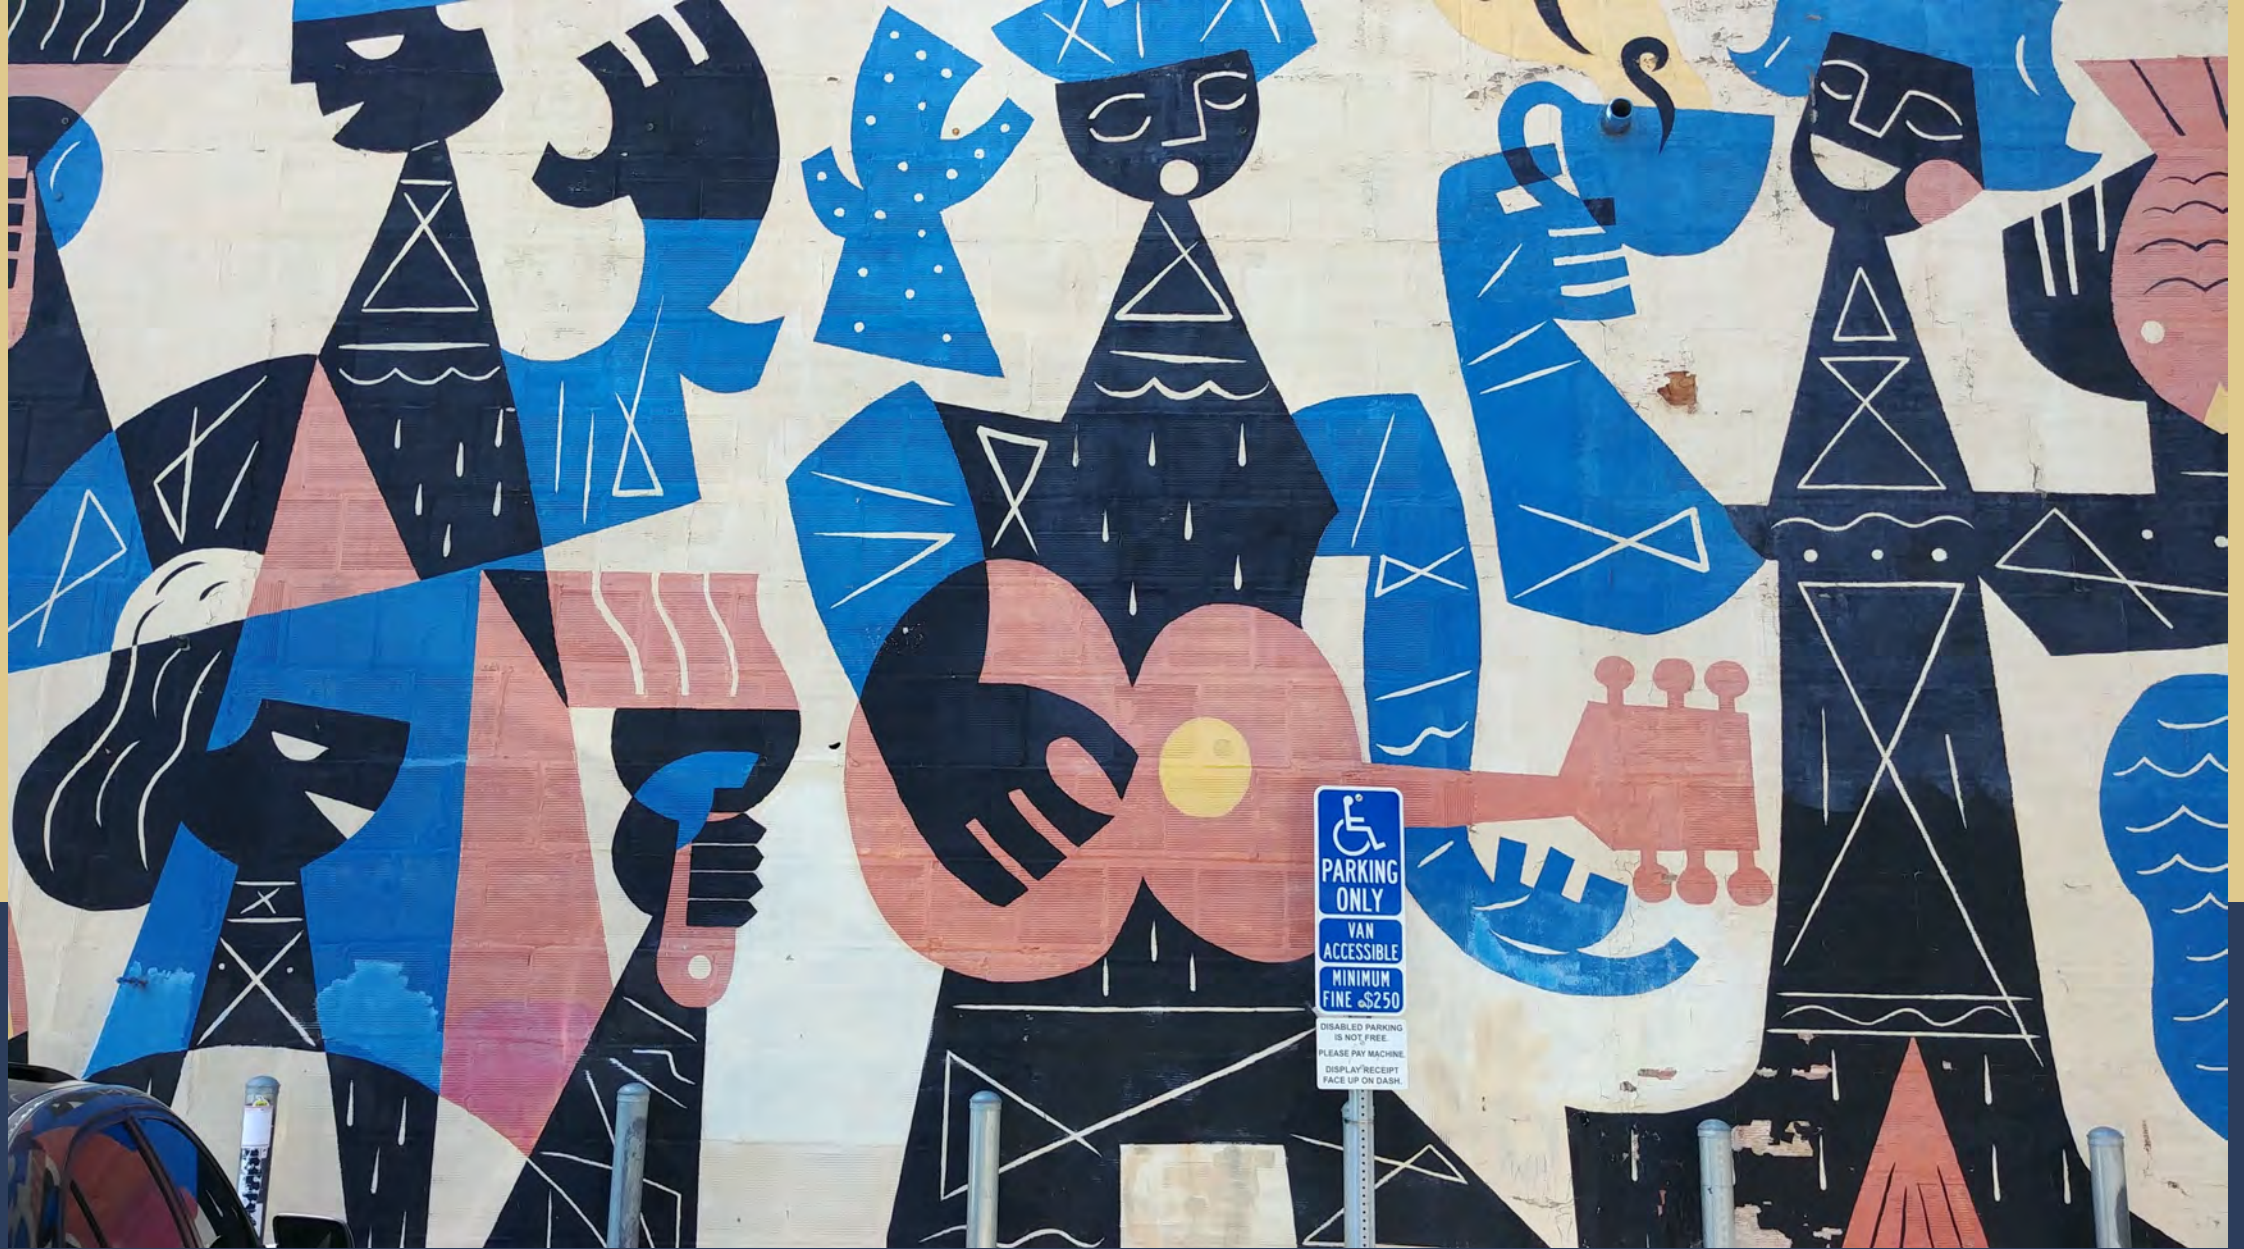

Mural, but where?



ISSN 1044-2138

UNIVERSITY OF ARIZONA

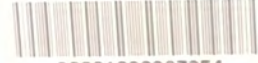

39001030387354

# AIDS

## INFORMATION SOURCEBOOK

---

Third Edition 1991-92

H. ROBERT MALINOWSKY  
GERALD J. PERRY

ORYX PRESS

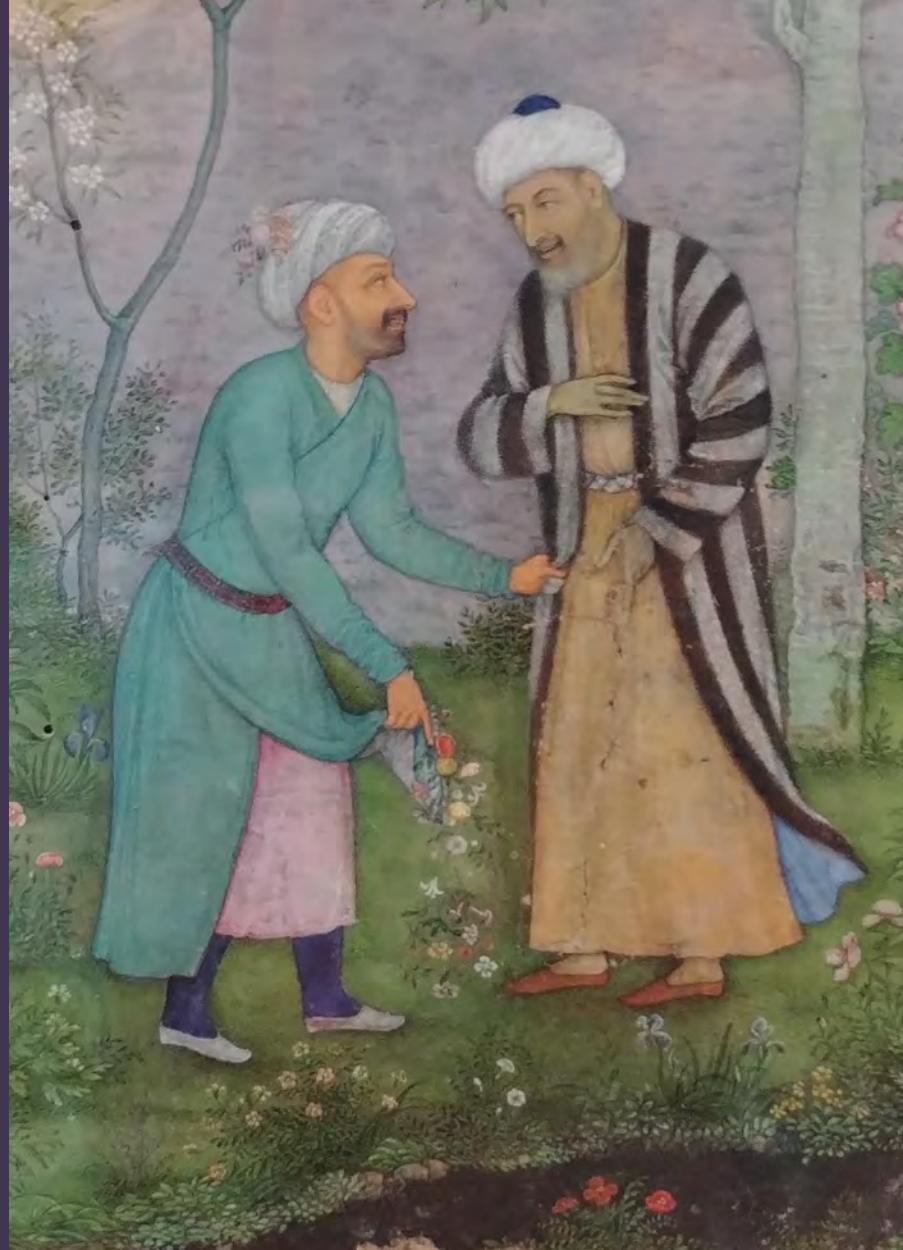

Persian art, Freer Gallery, Smithsonian Museum



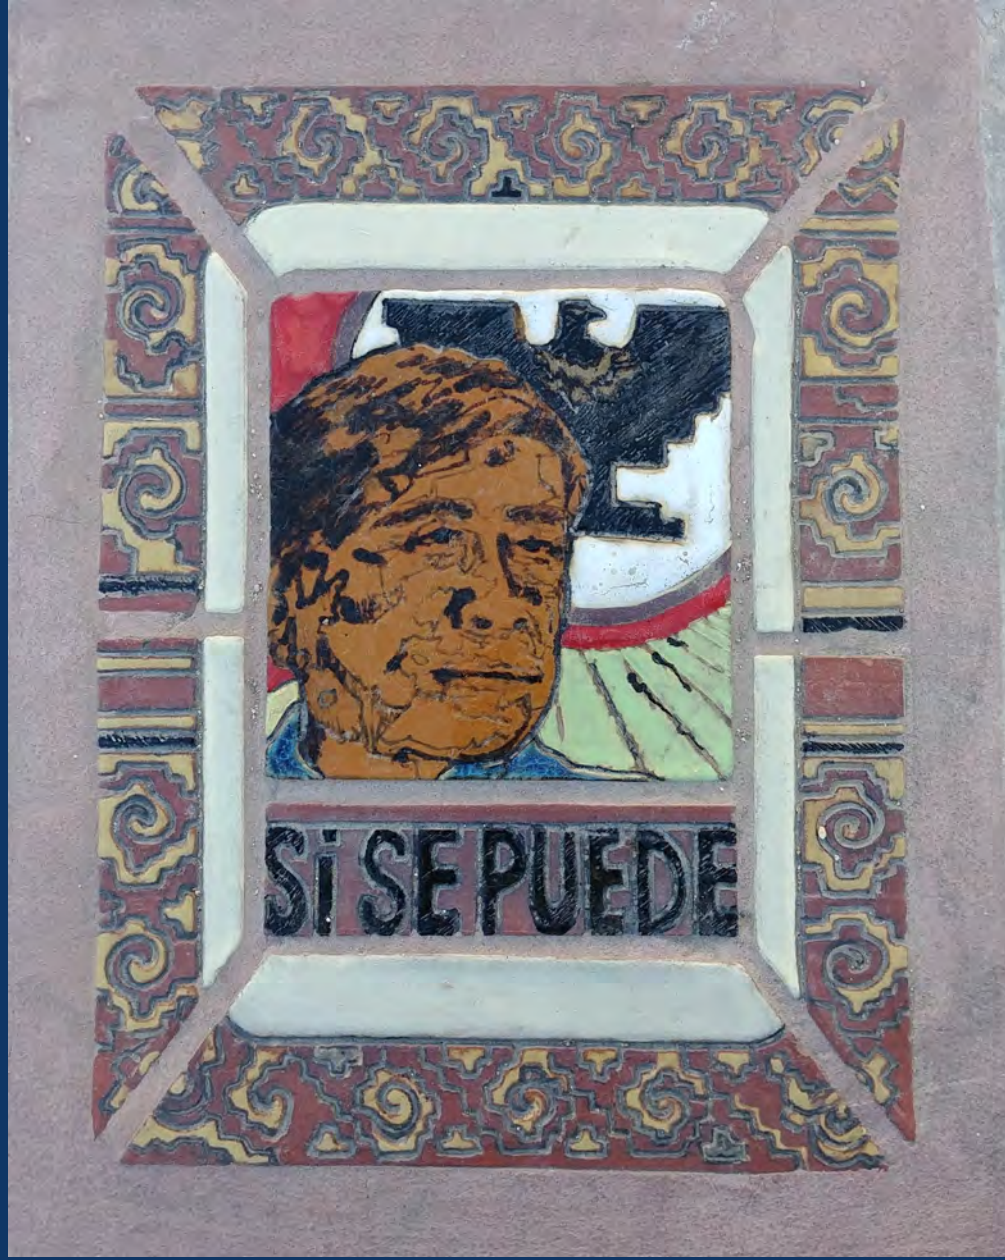

Cesar Chavez tile, Mercado San Augustin, Tucson



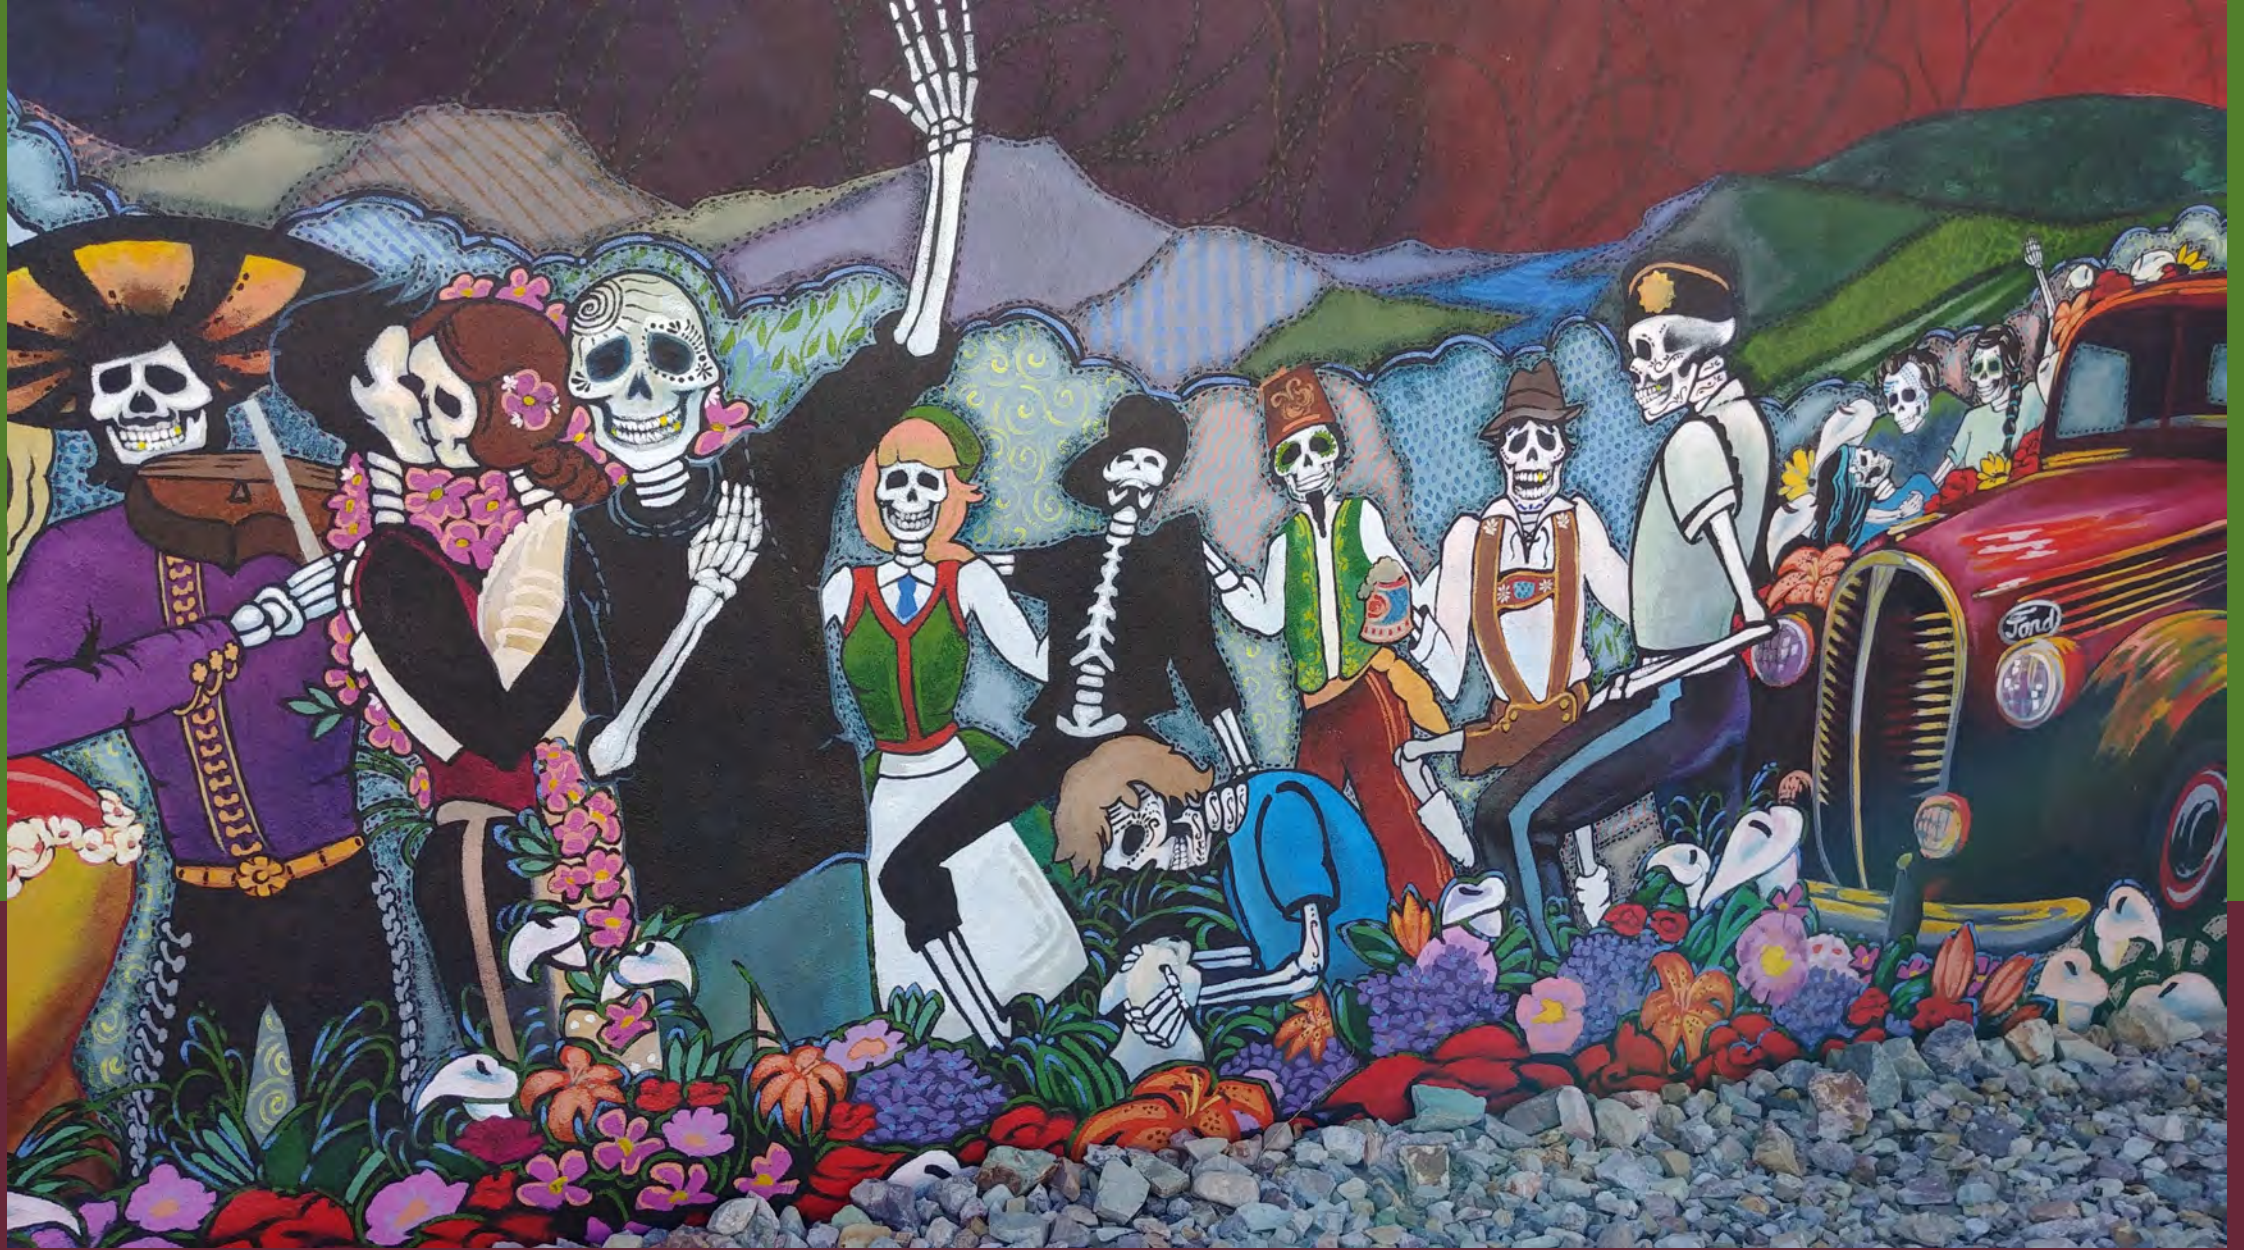

Dia de los Muertos mural, Why, Arizona



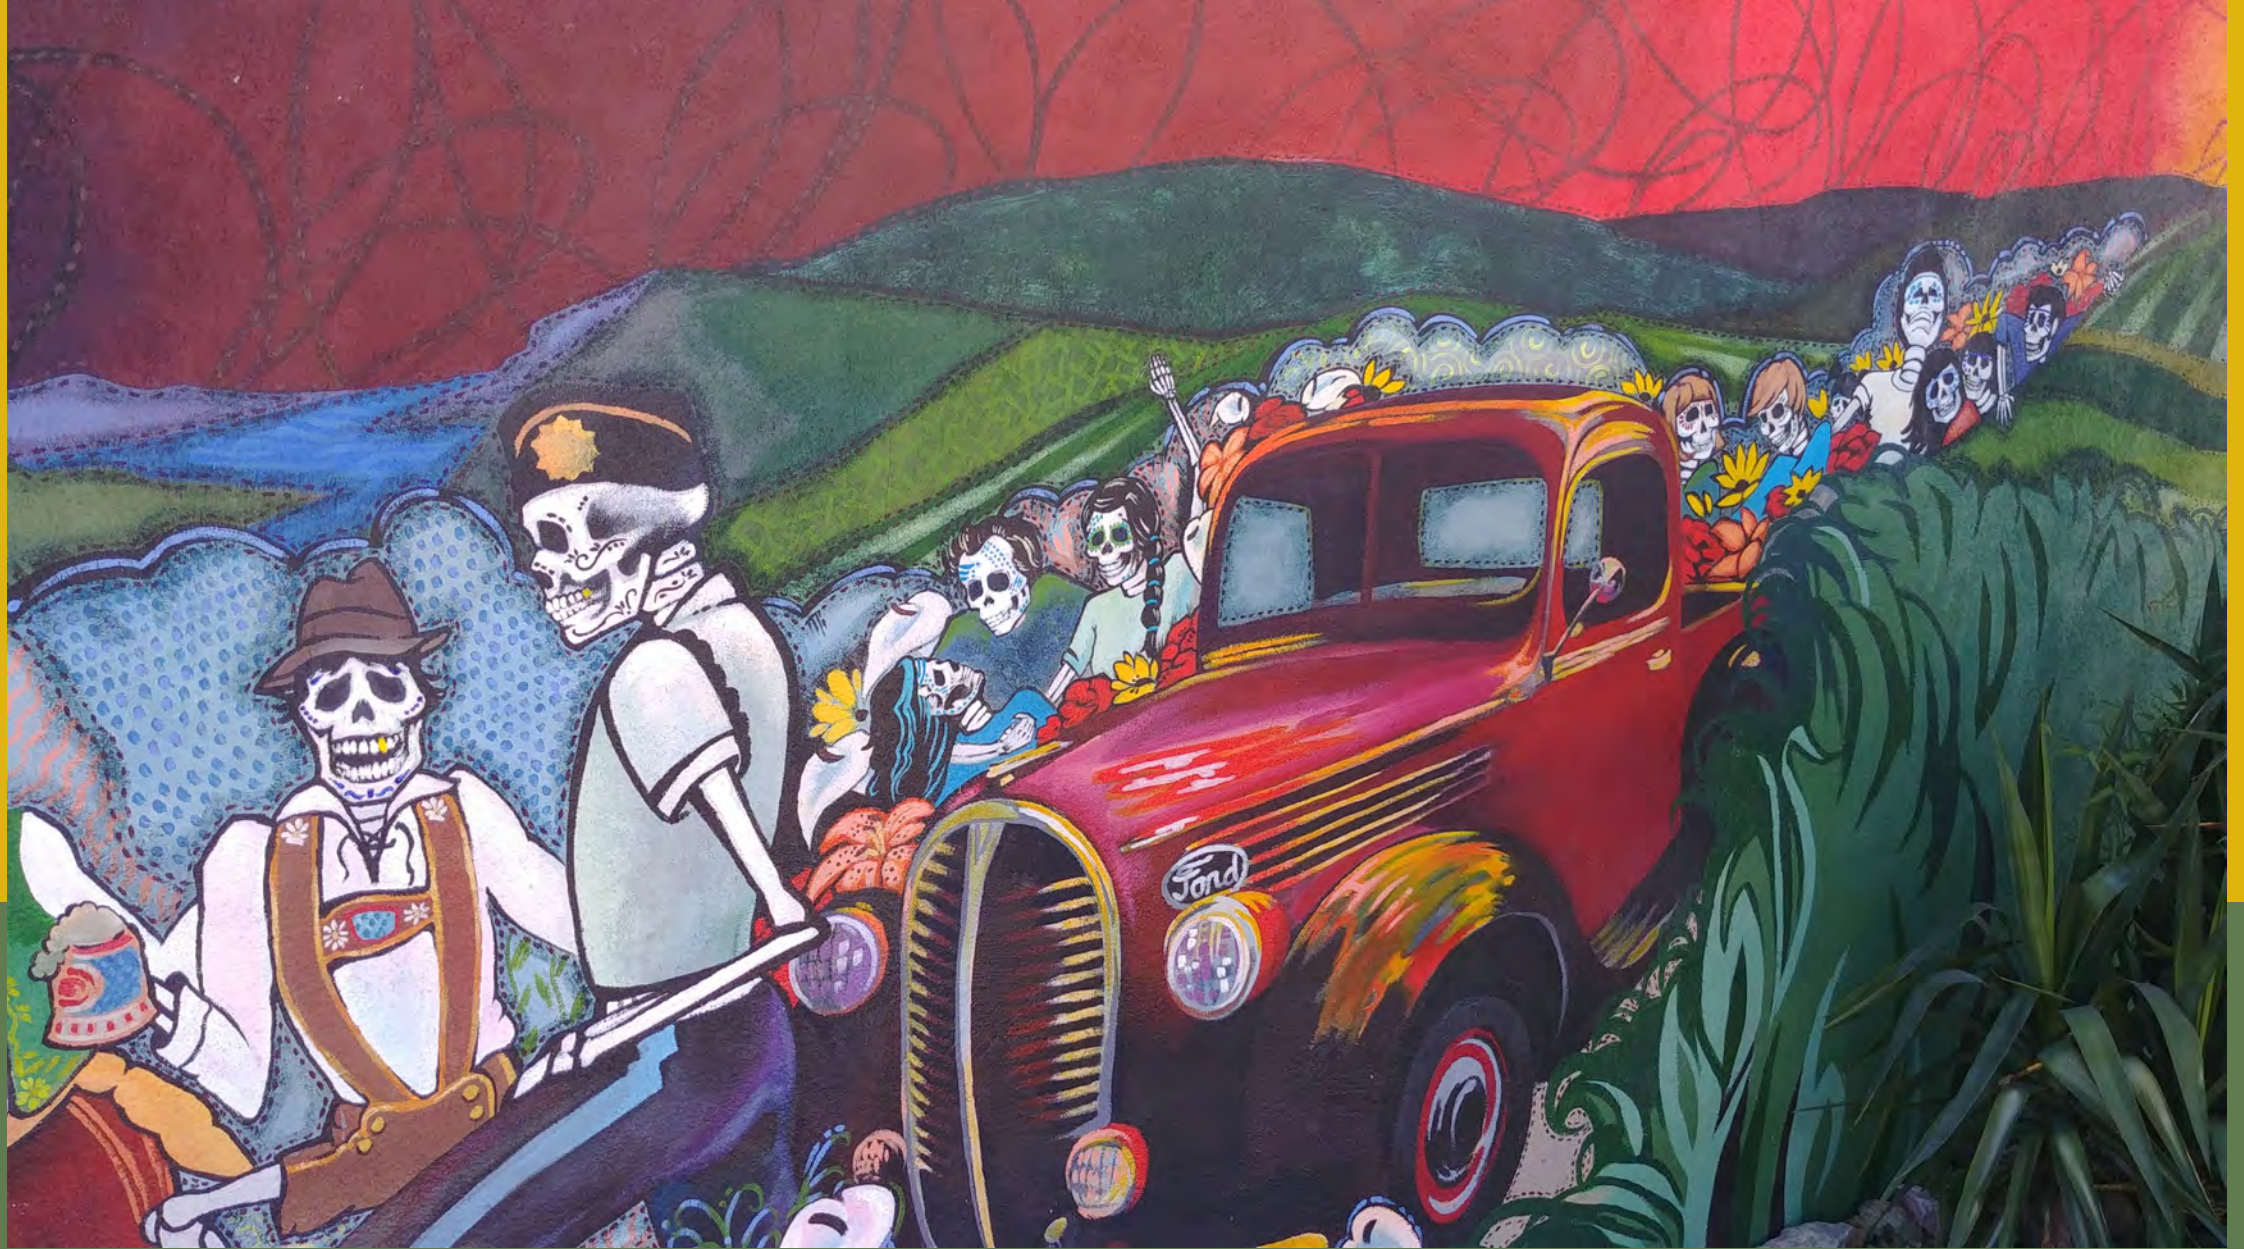

Dia de los Muertos mural, Why, Arizona



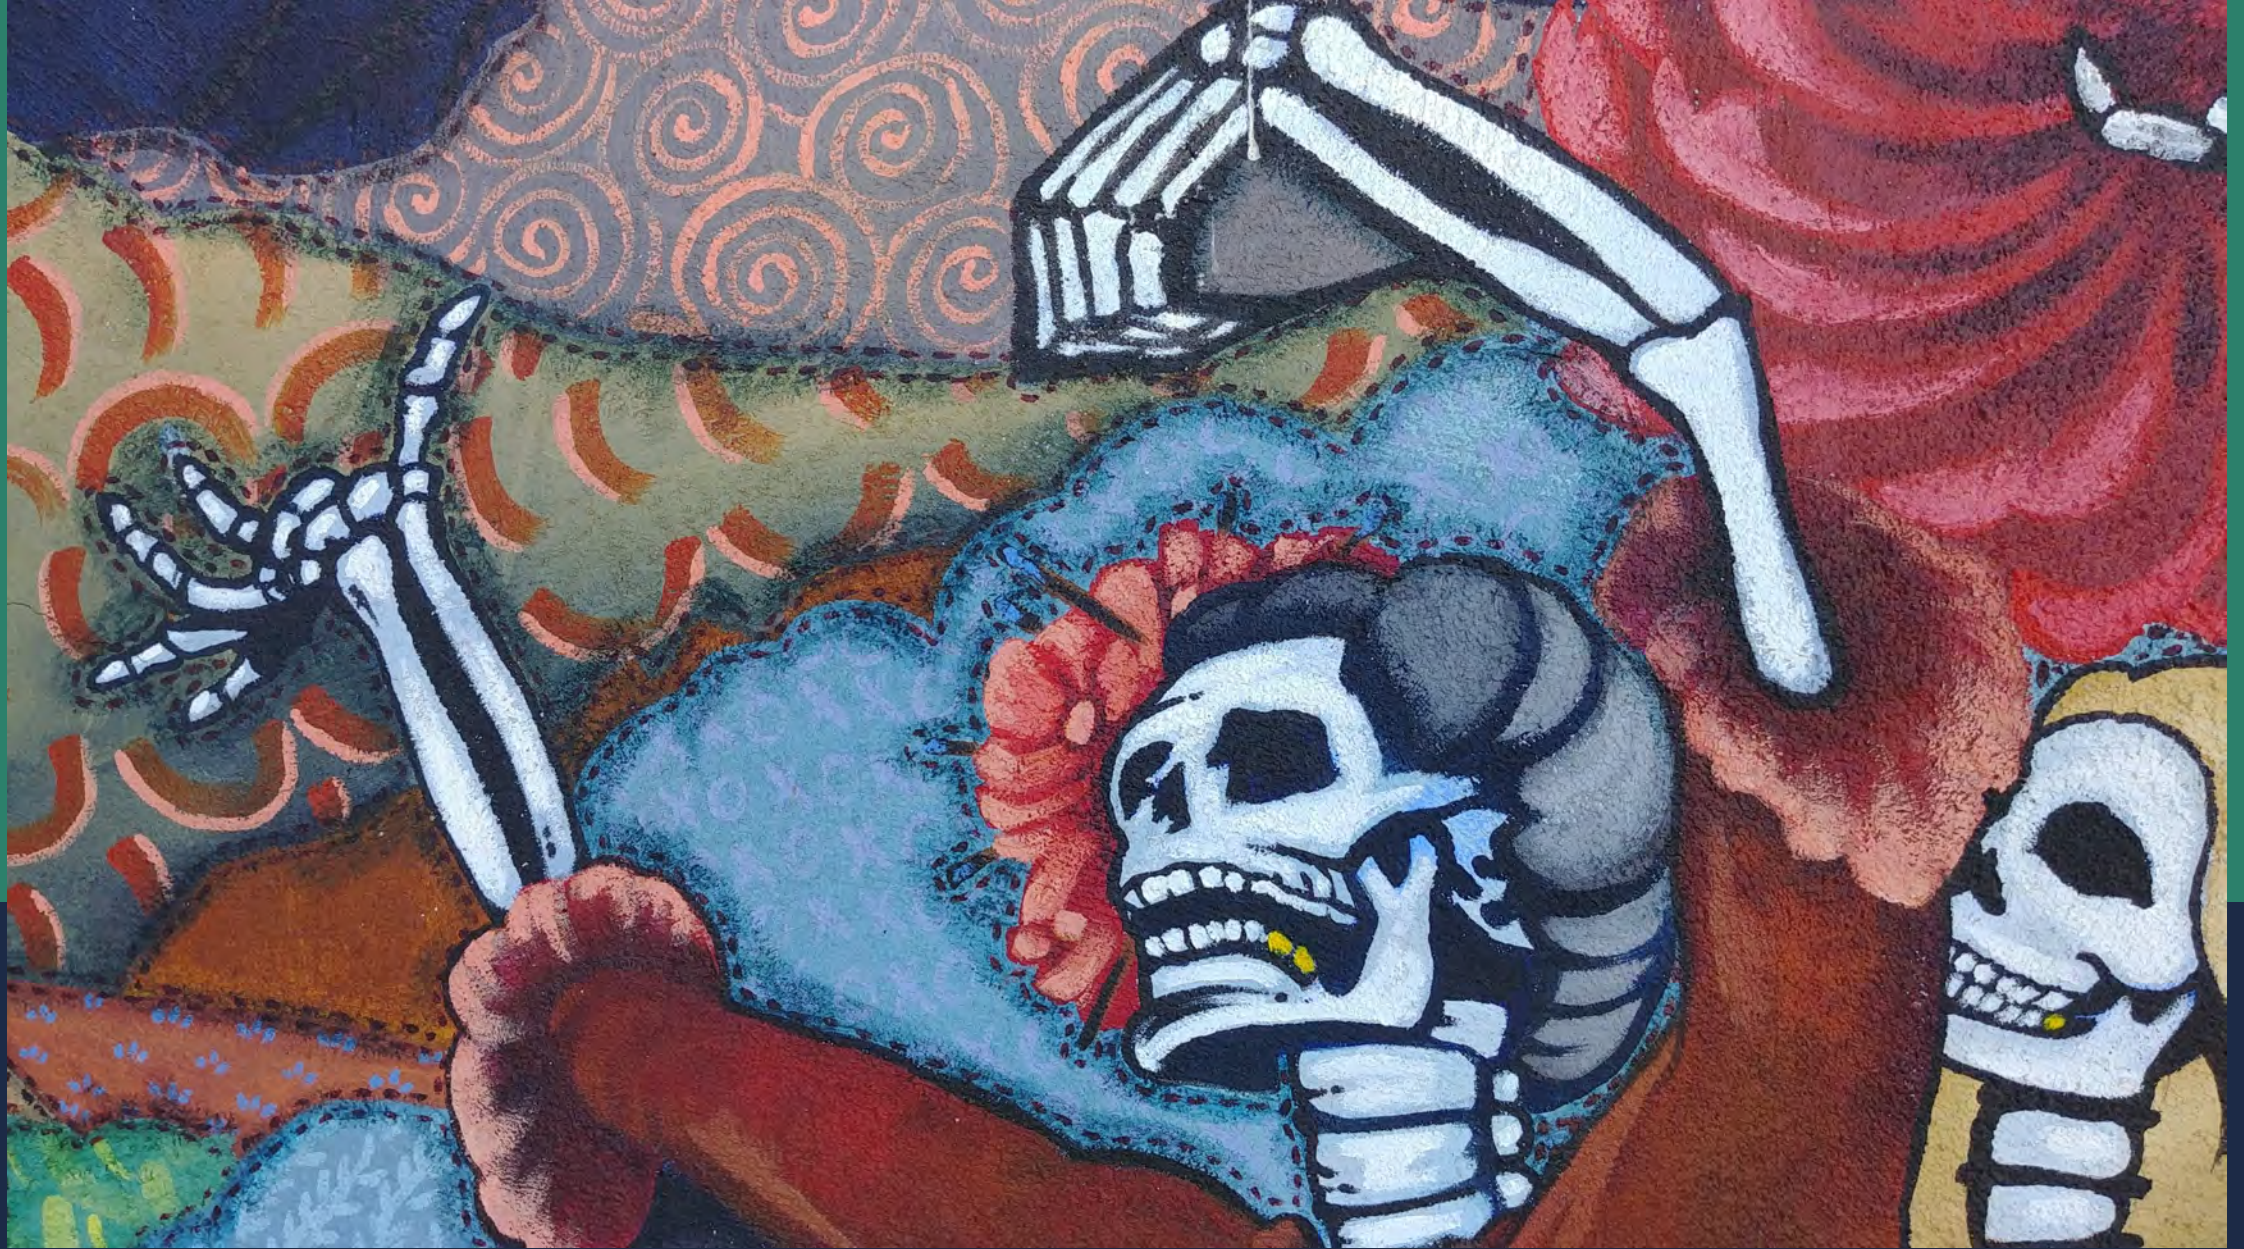

Dia de los Muertos mural, Why, Arizona



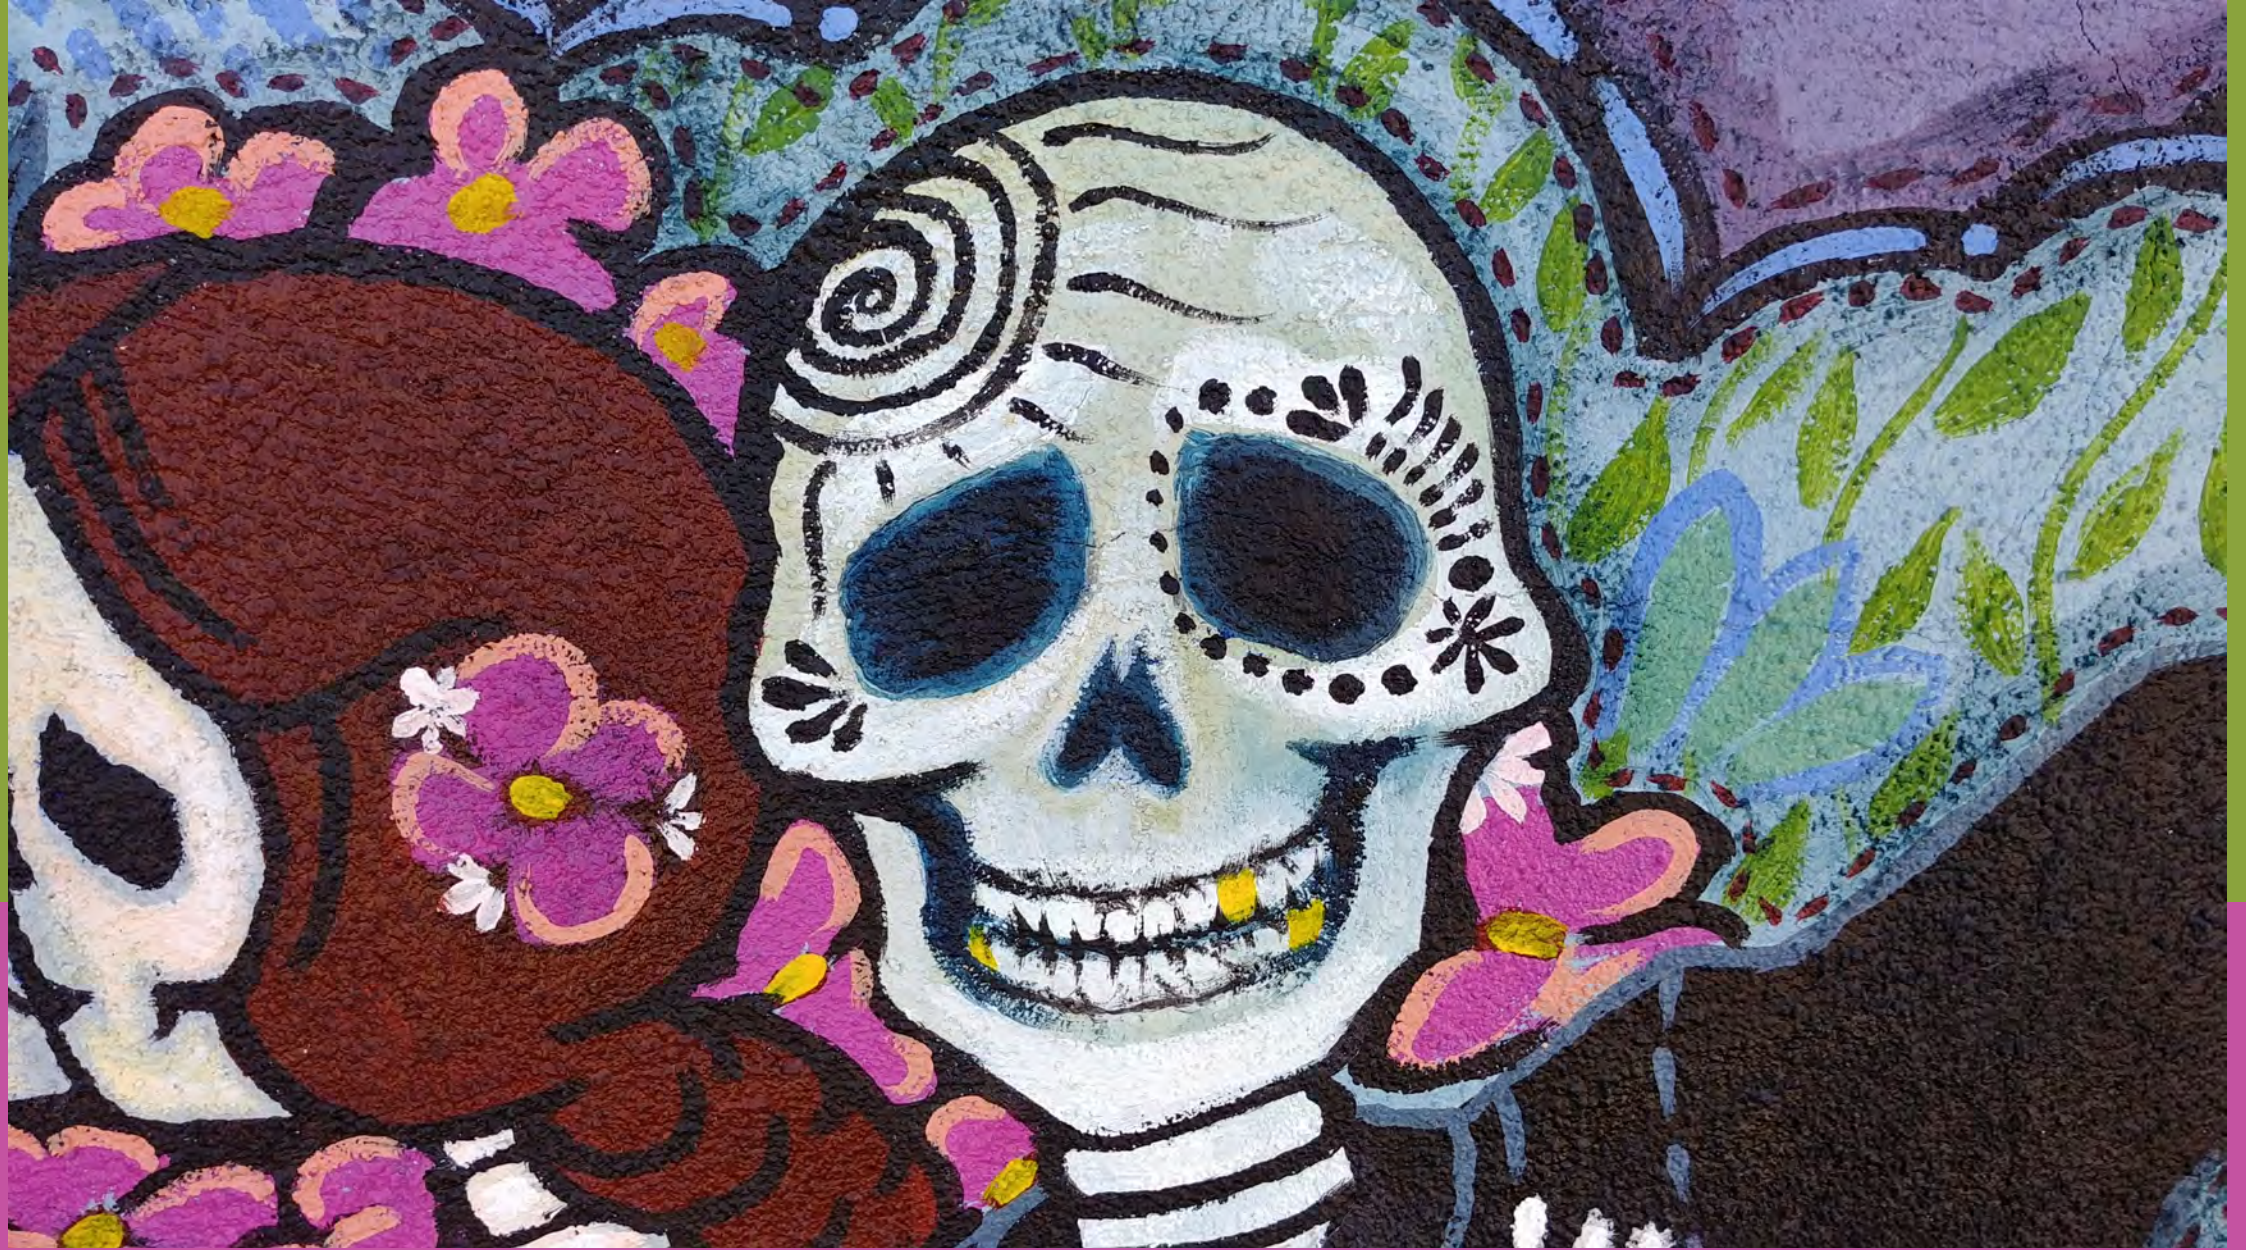

Día de los Muertos mural, Why, Arizona



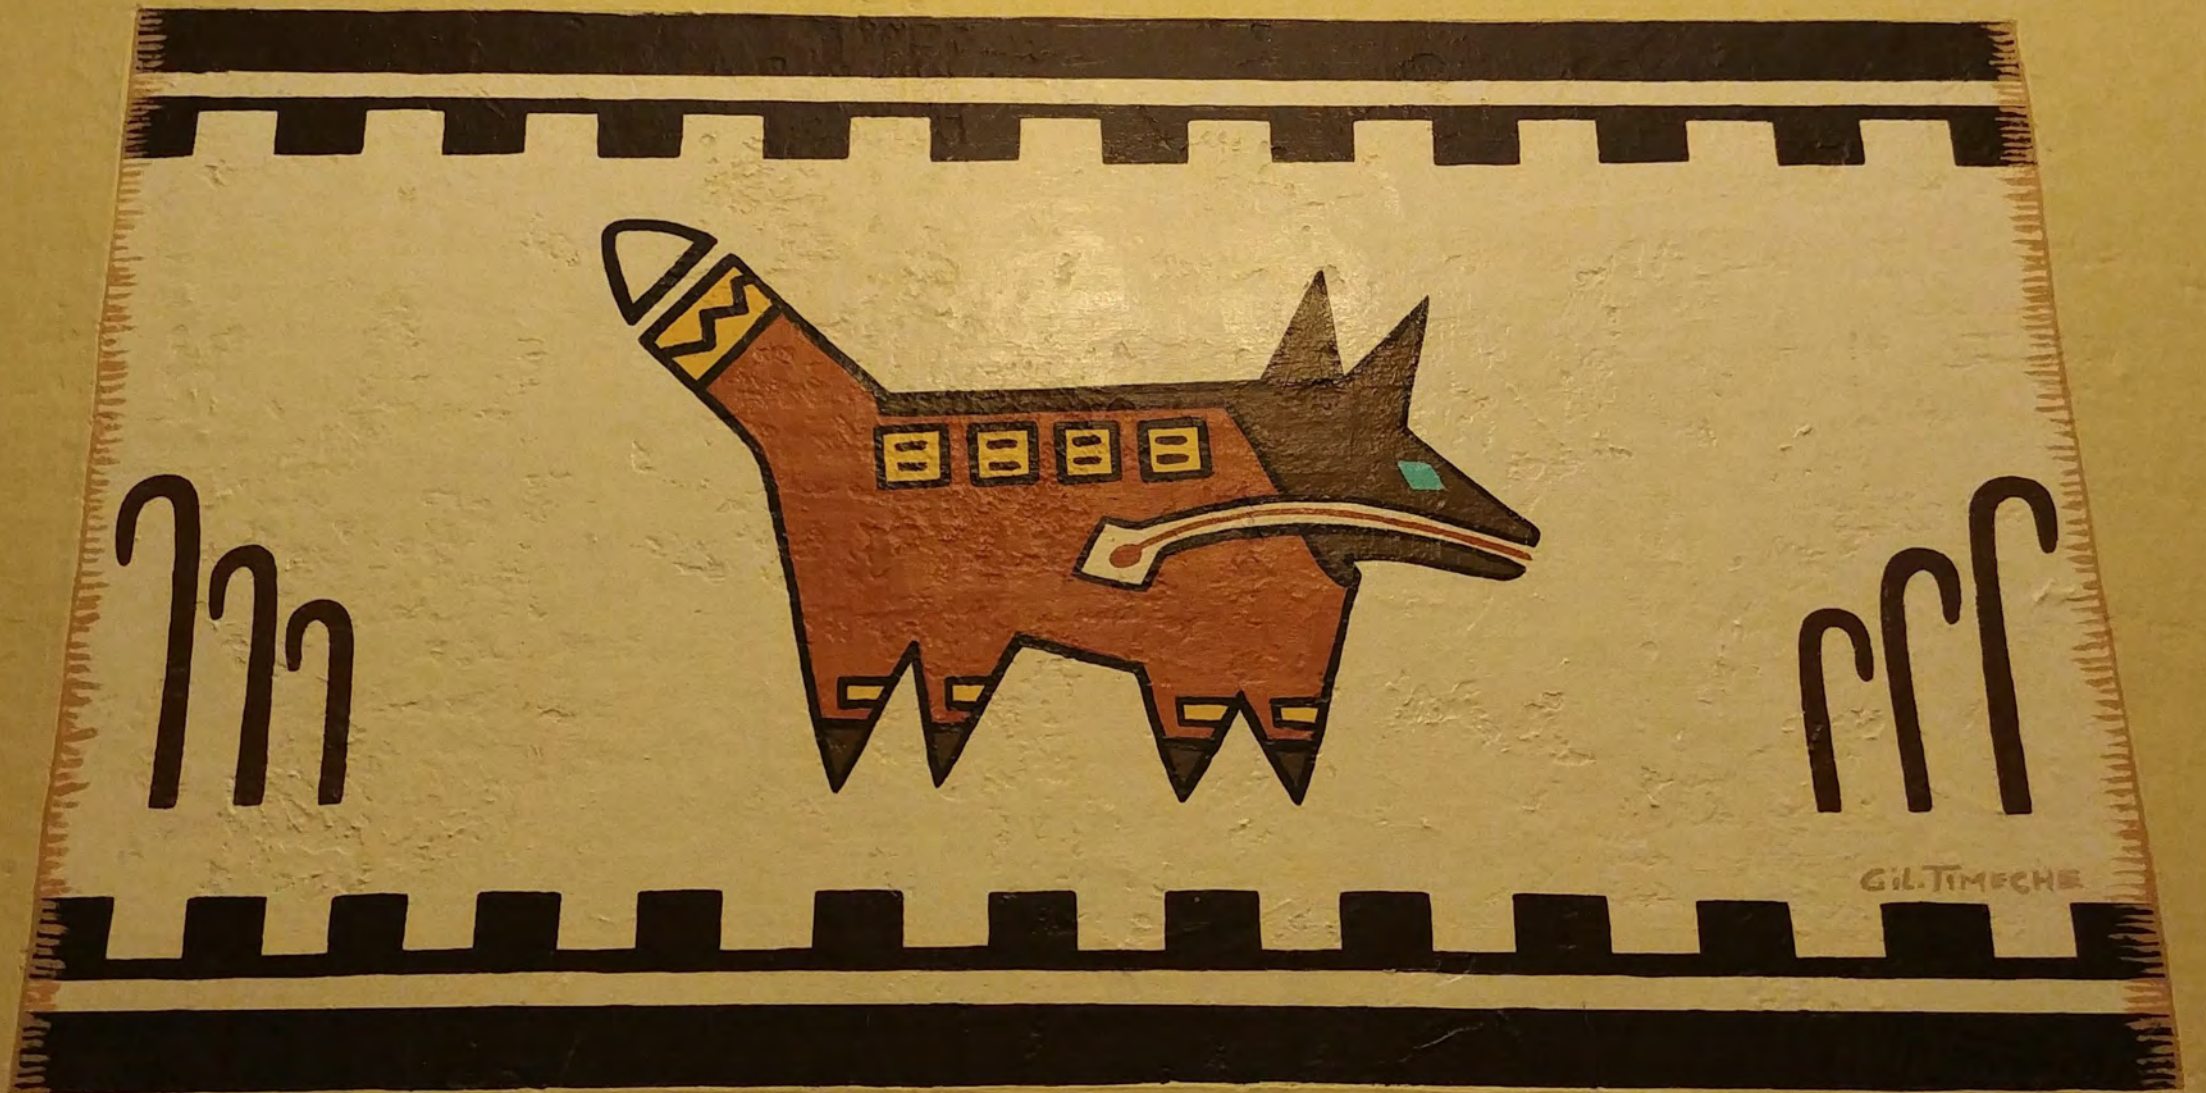

Native American motif, El Tovar Hotel, Grand Canyon



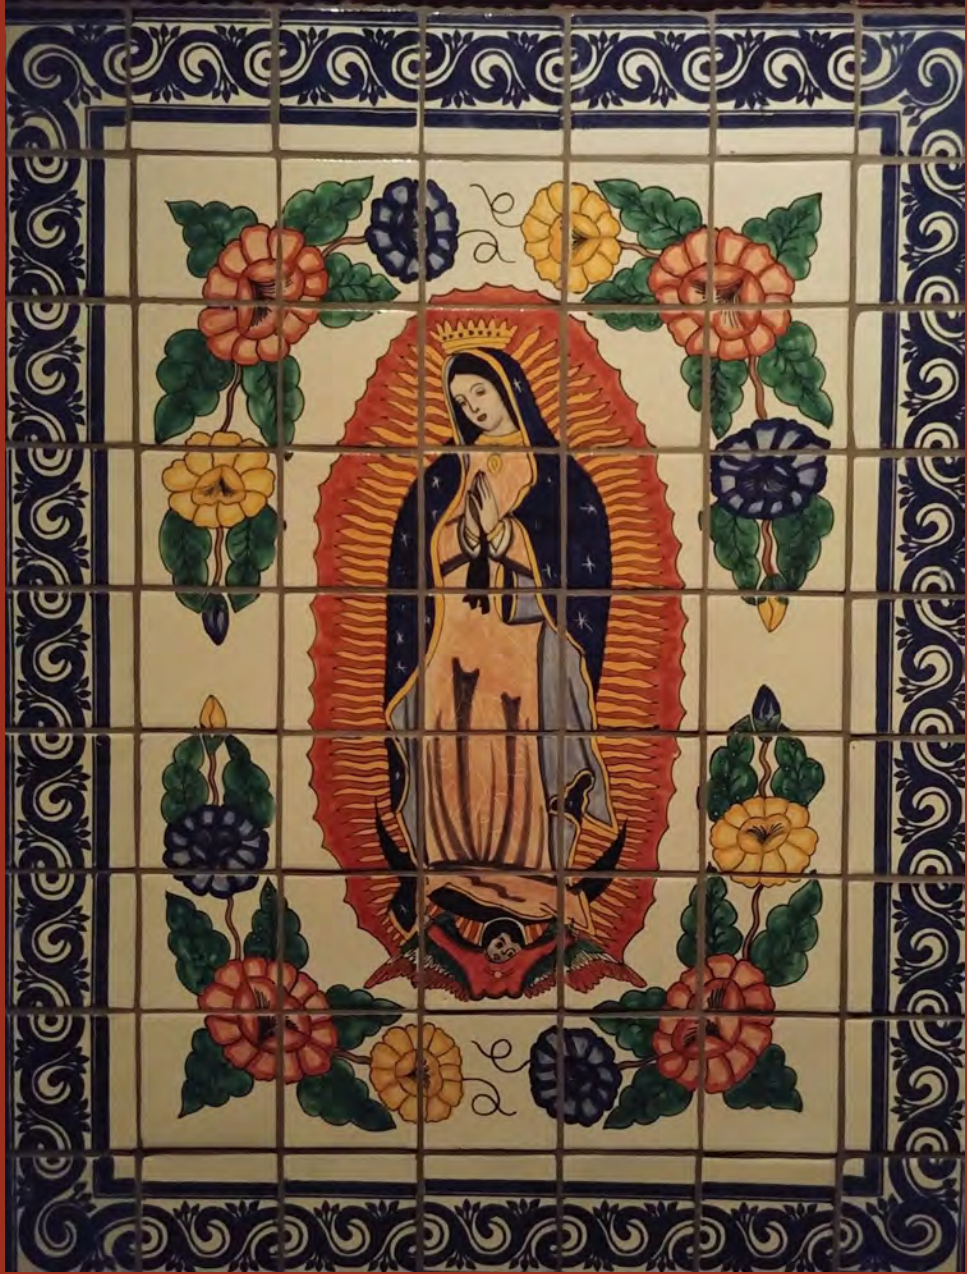

Virgen de Guadalupe, tile art, Tucson



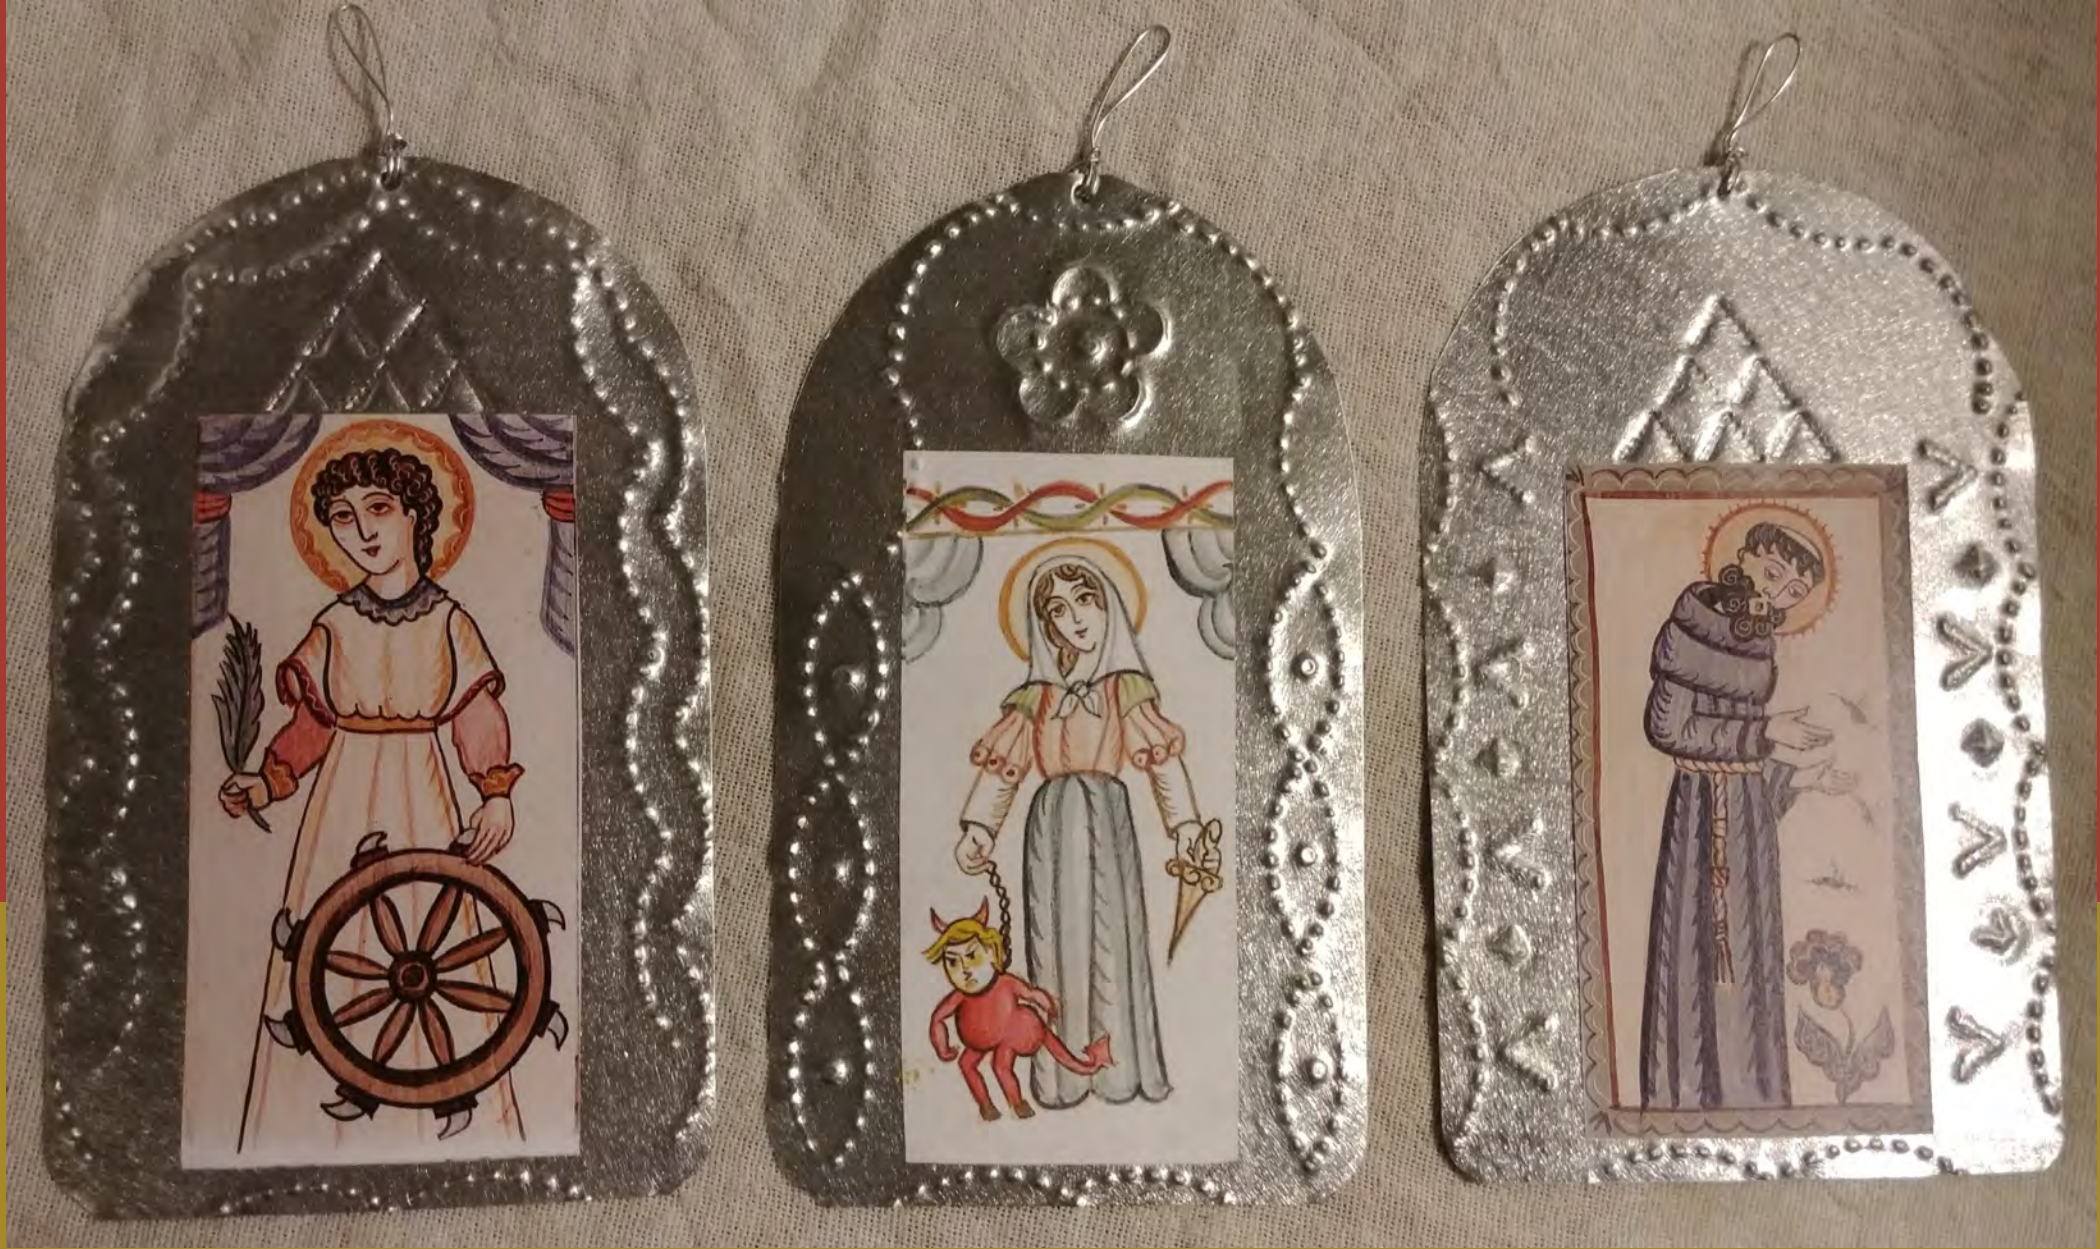

Santos, La Paloma, Tubac, Arizona



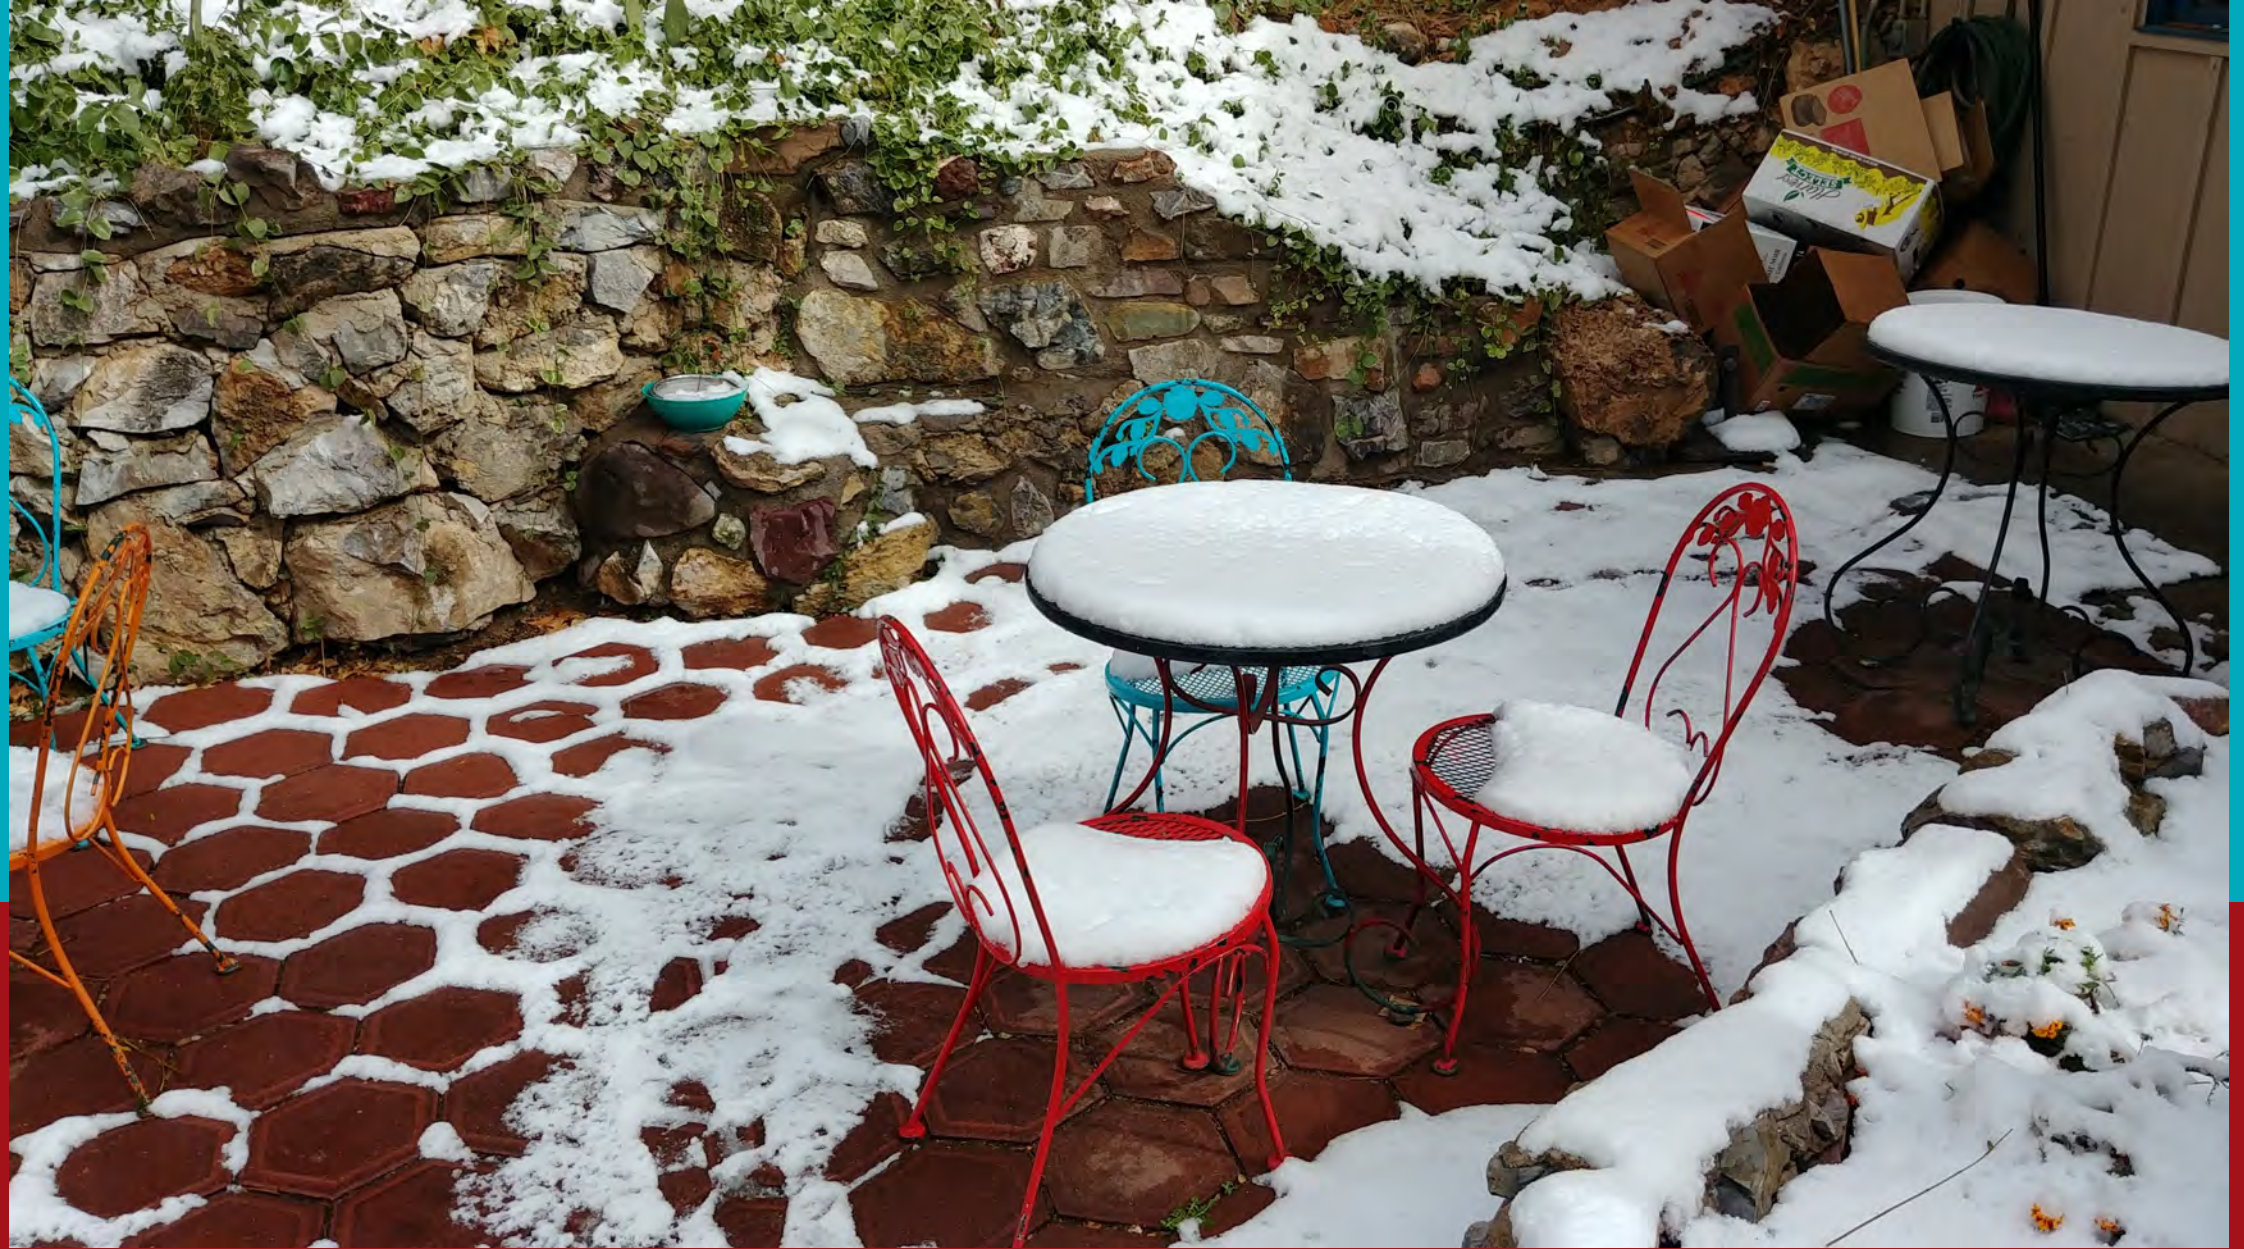

Bisbee in snow



**Humanitarian Aid  
Is Never A Crime**

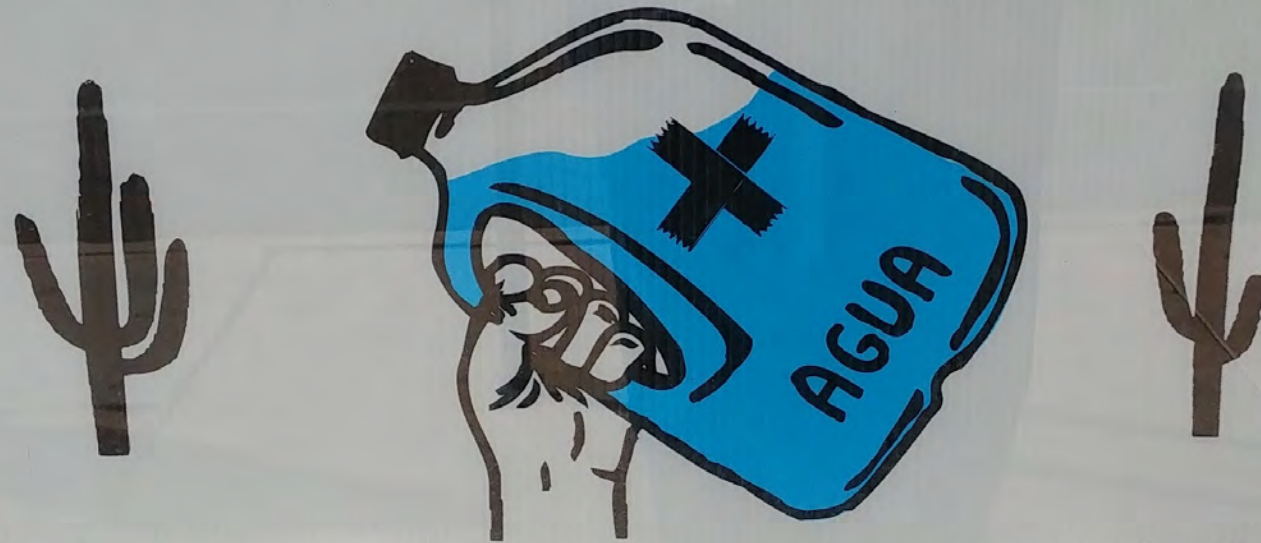

**Drop The Charges** [nomoredeaths.org](http://nomoredeaths.org)

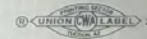

Tucson yard sign supporting Samaritan aid to desert border crossers



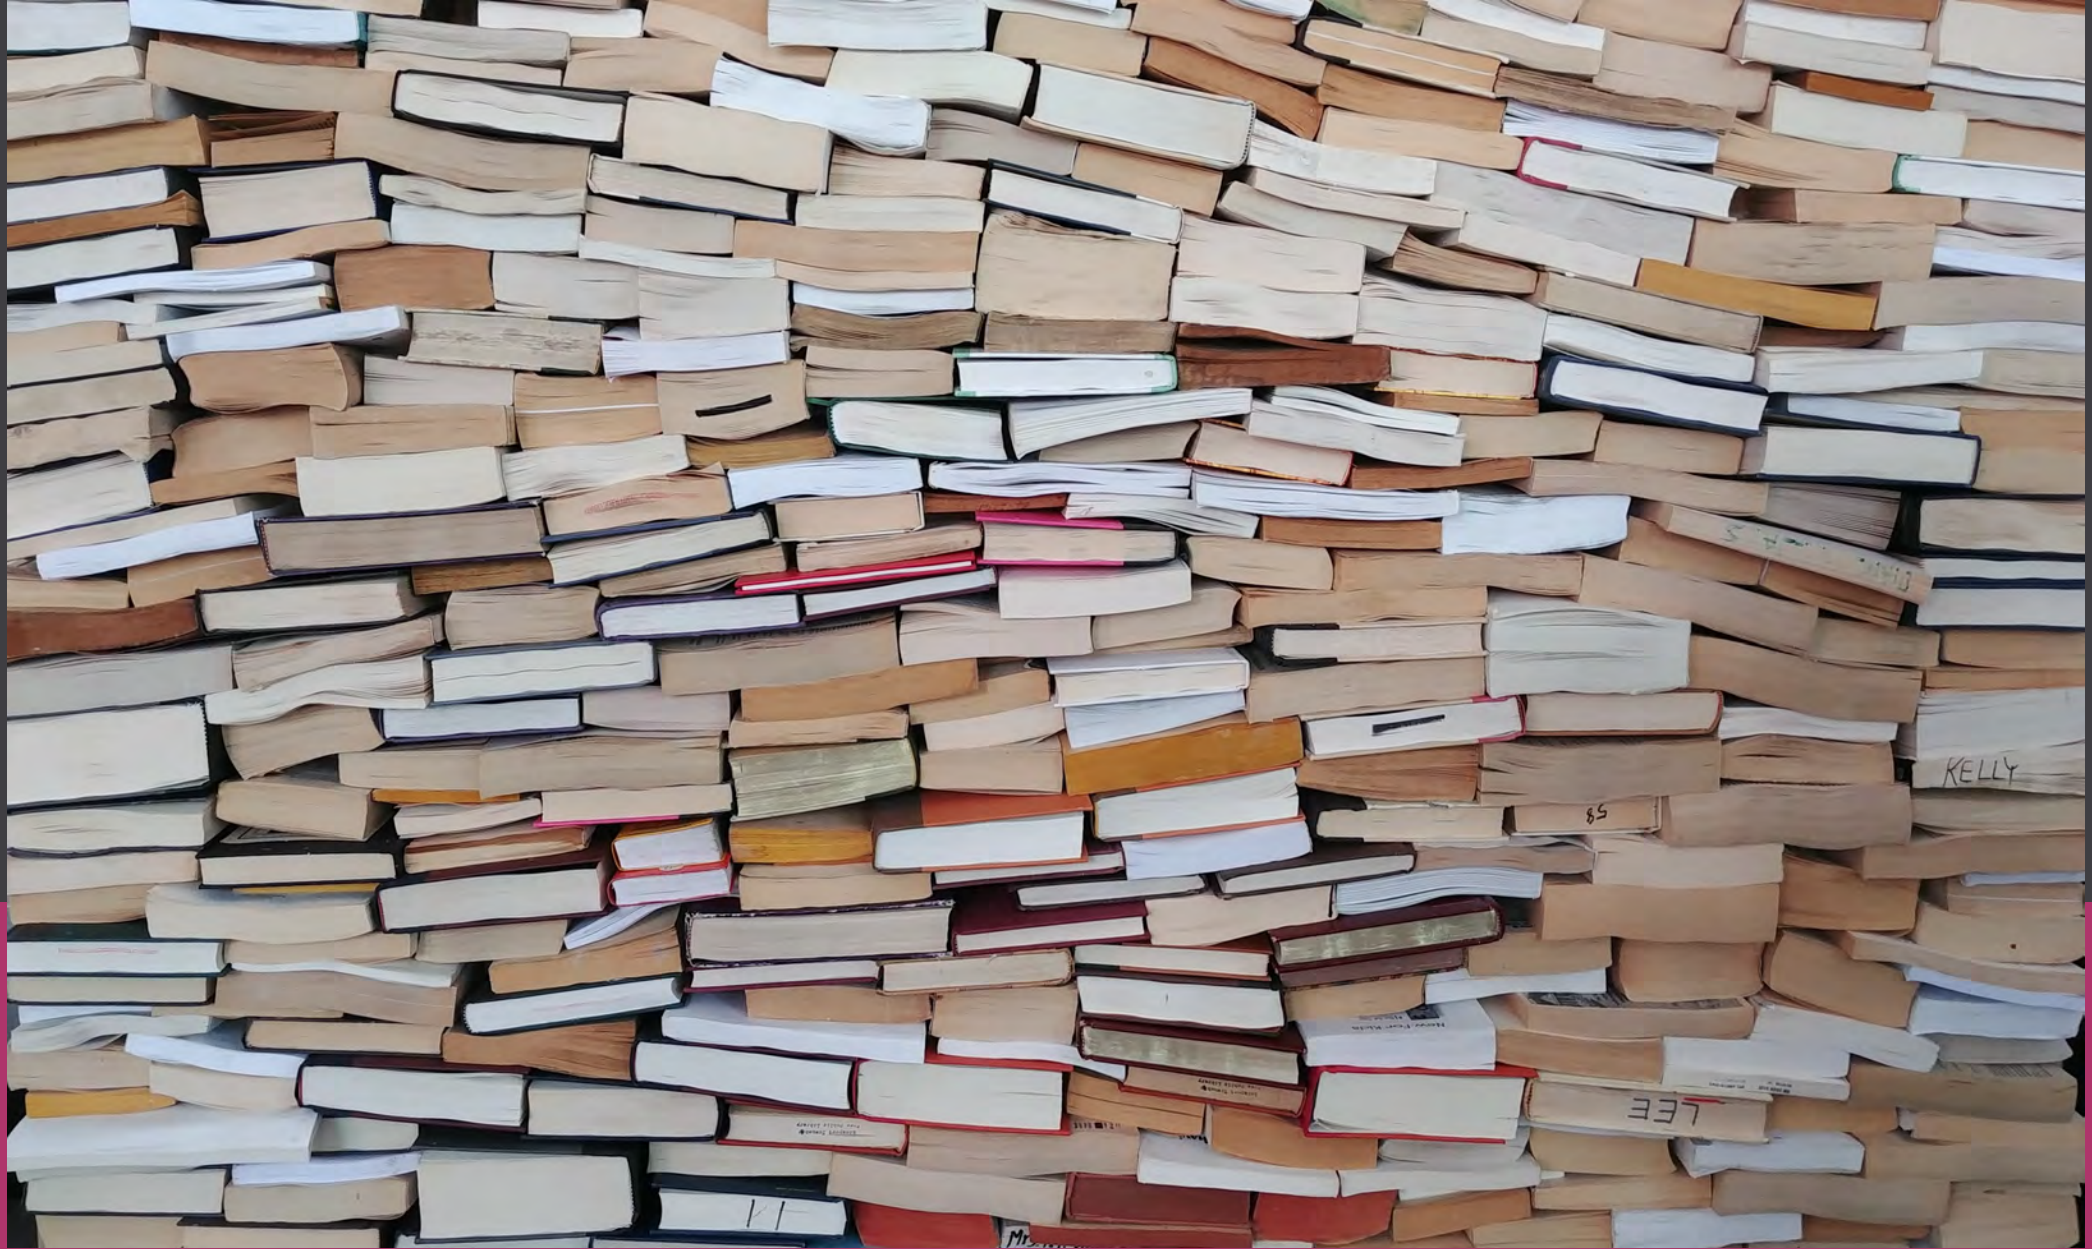

Wall of books



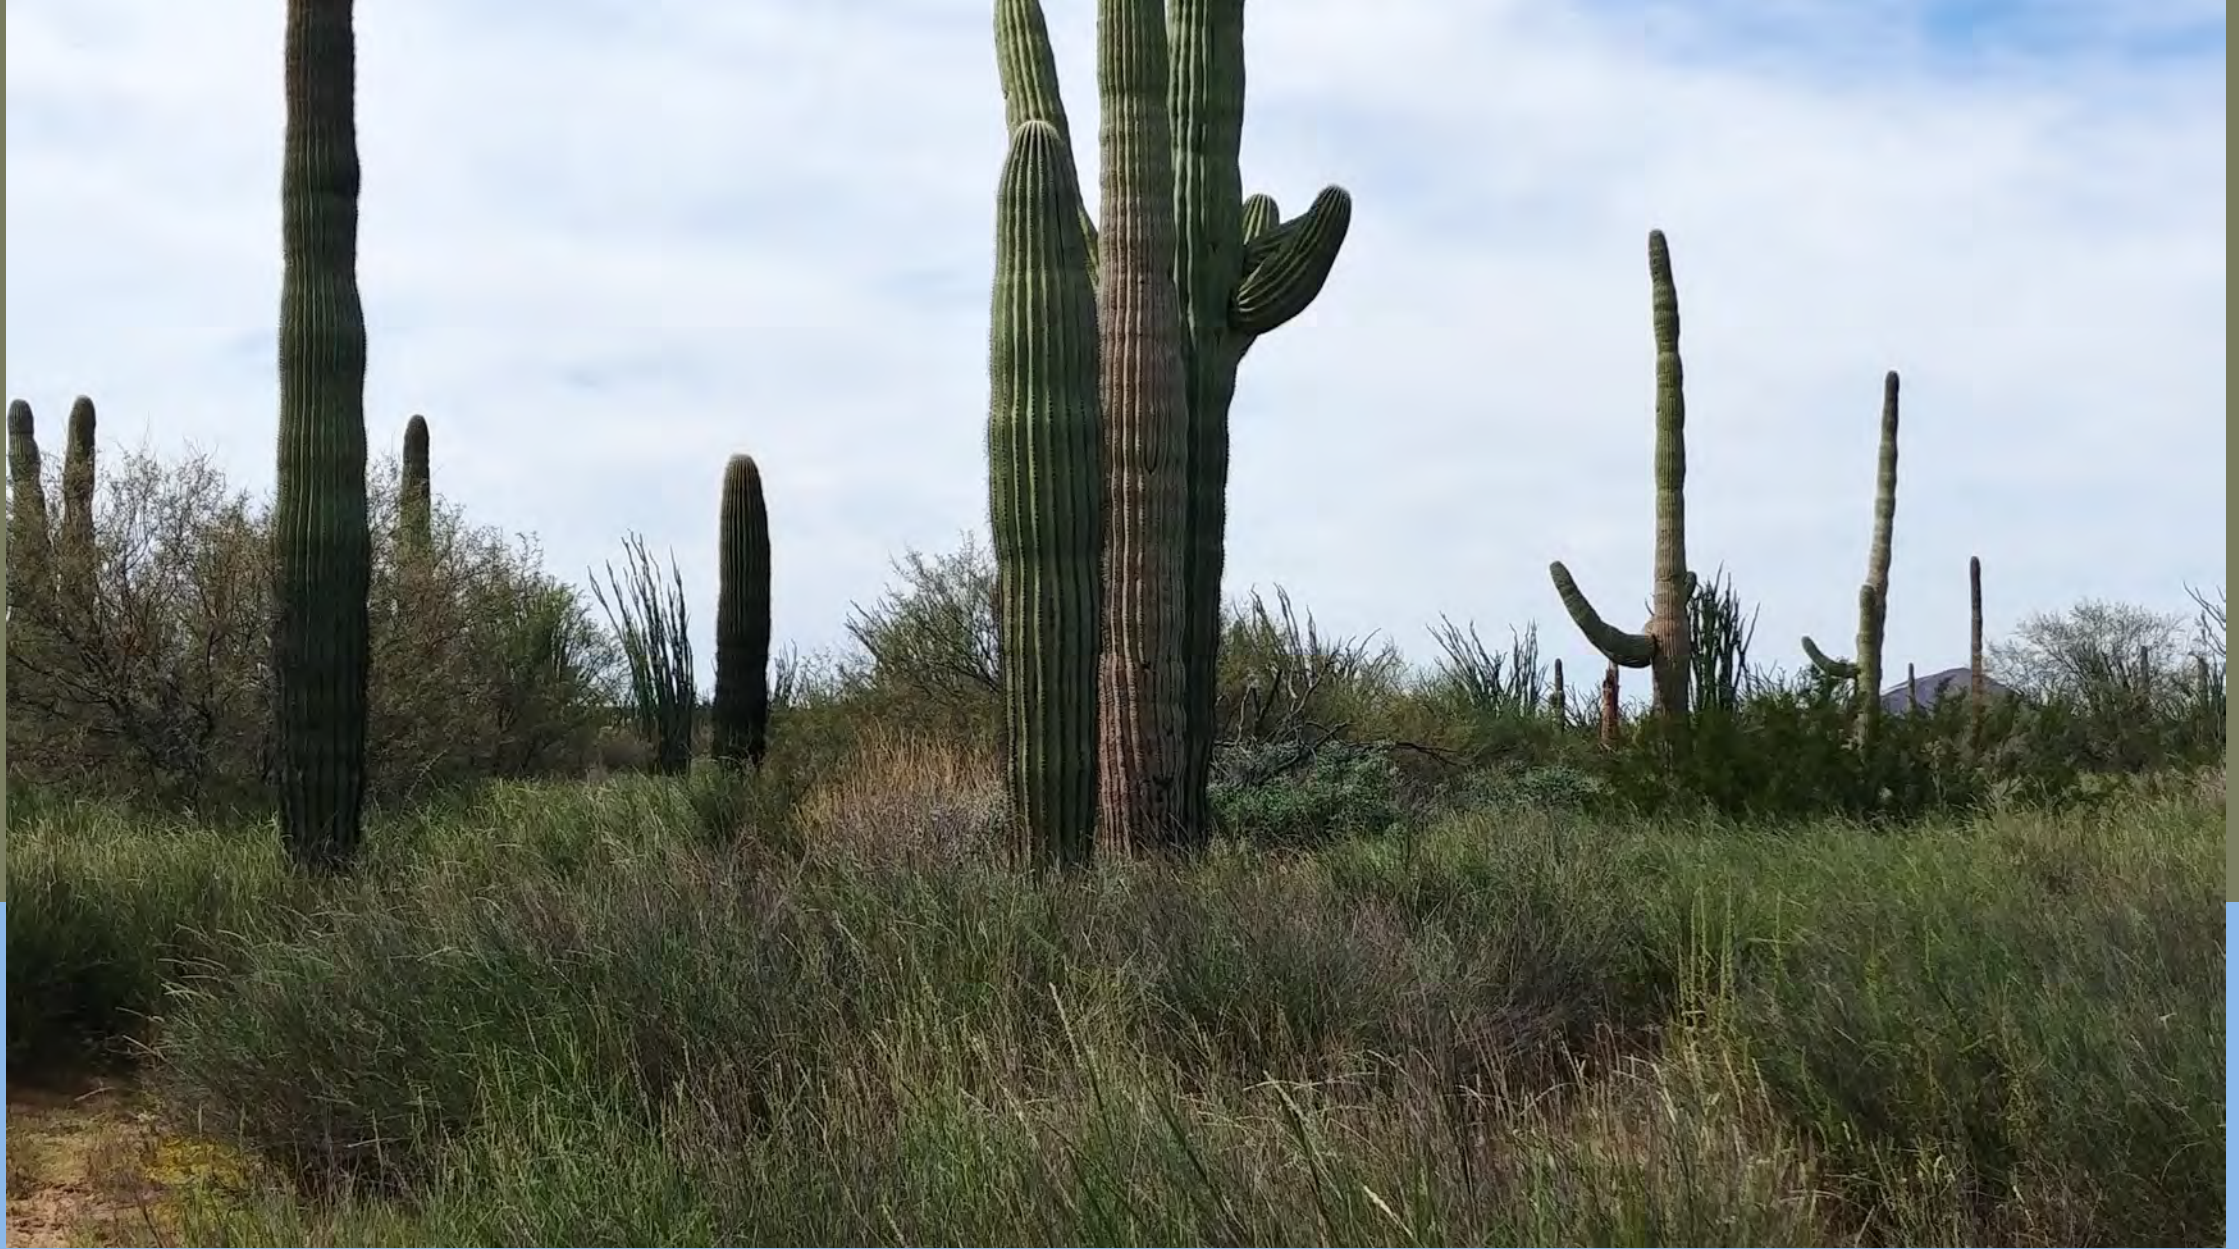

Sonoran Desert, Mexico/Arizona



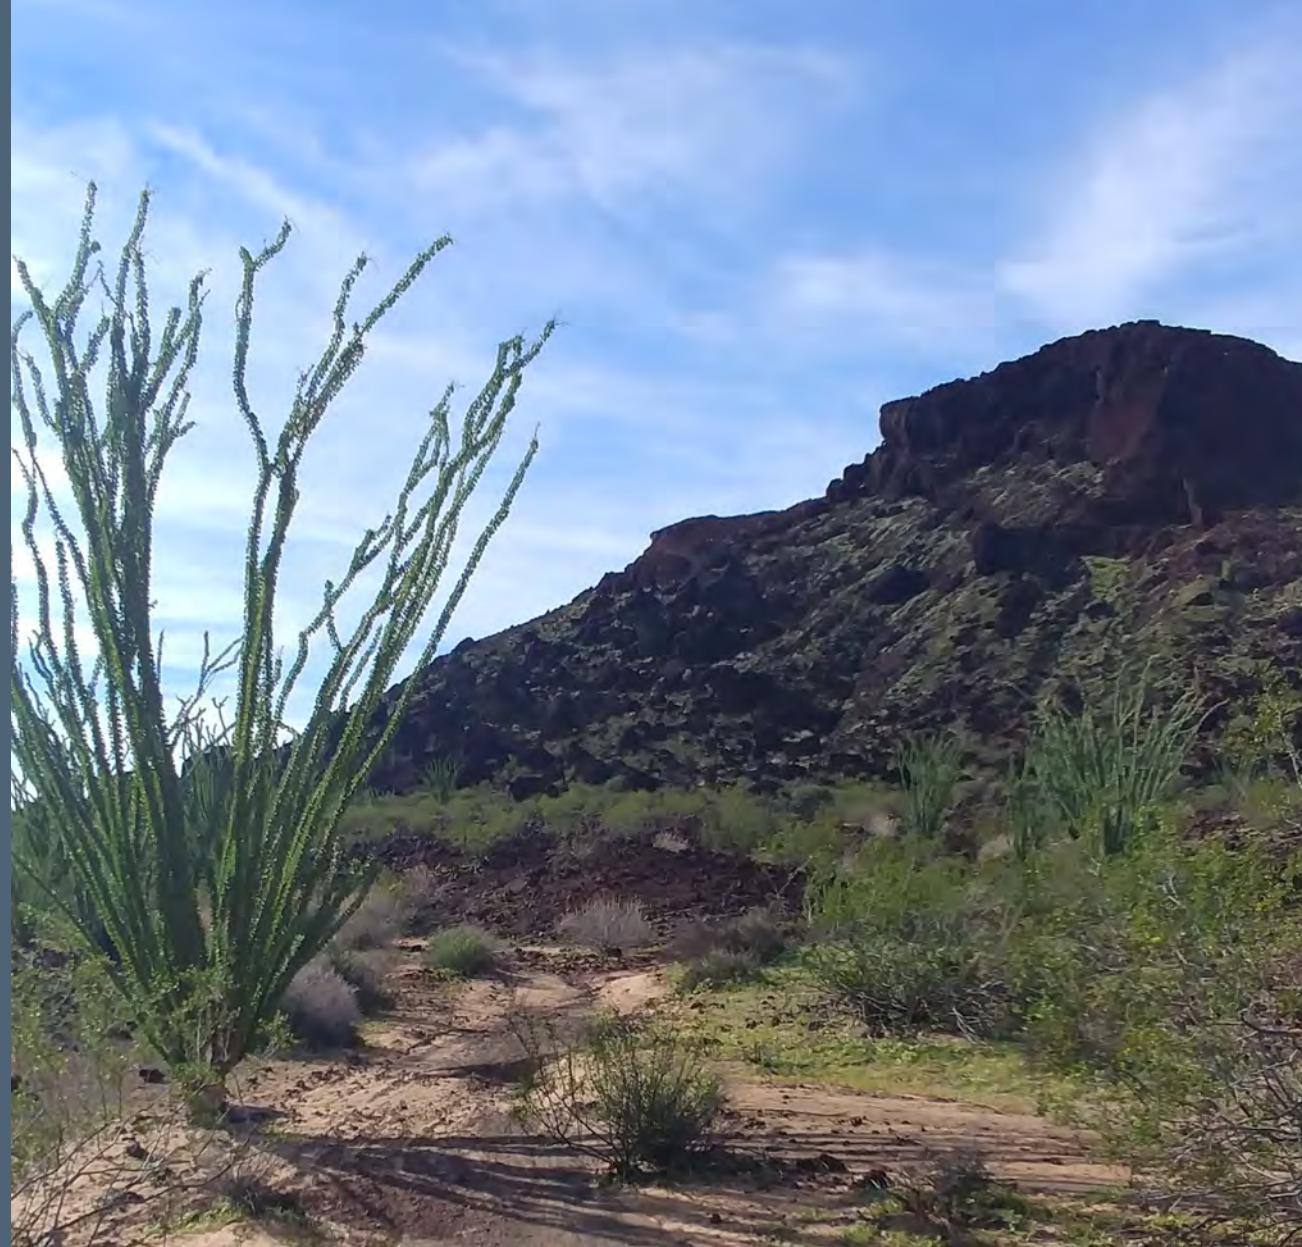

Pinacate, Sonora, Mexico



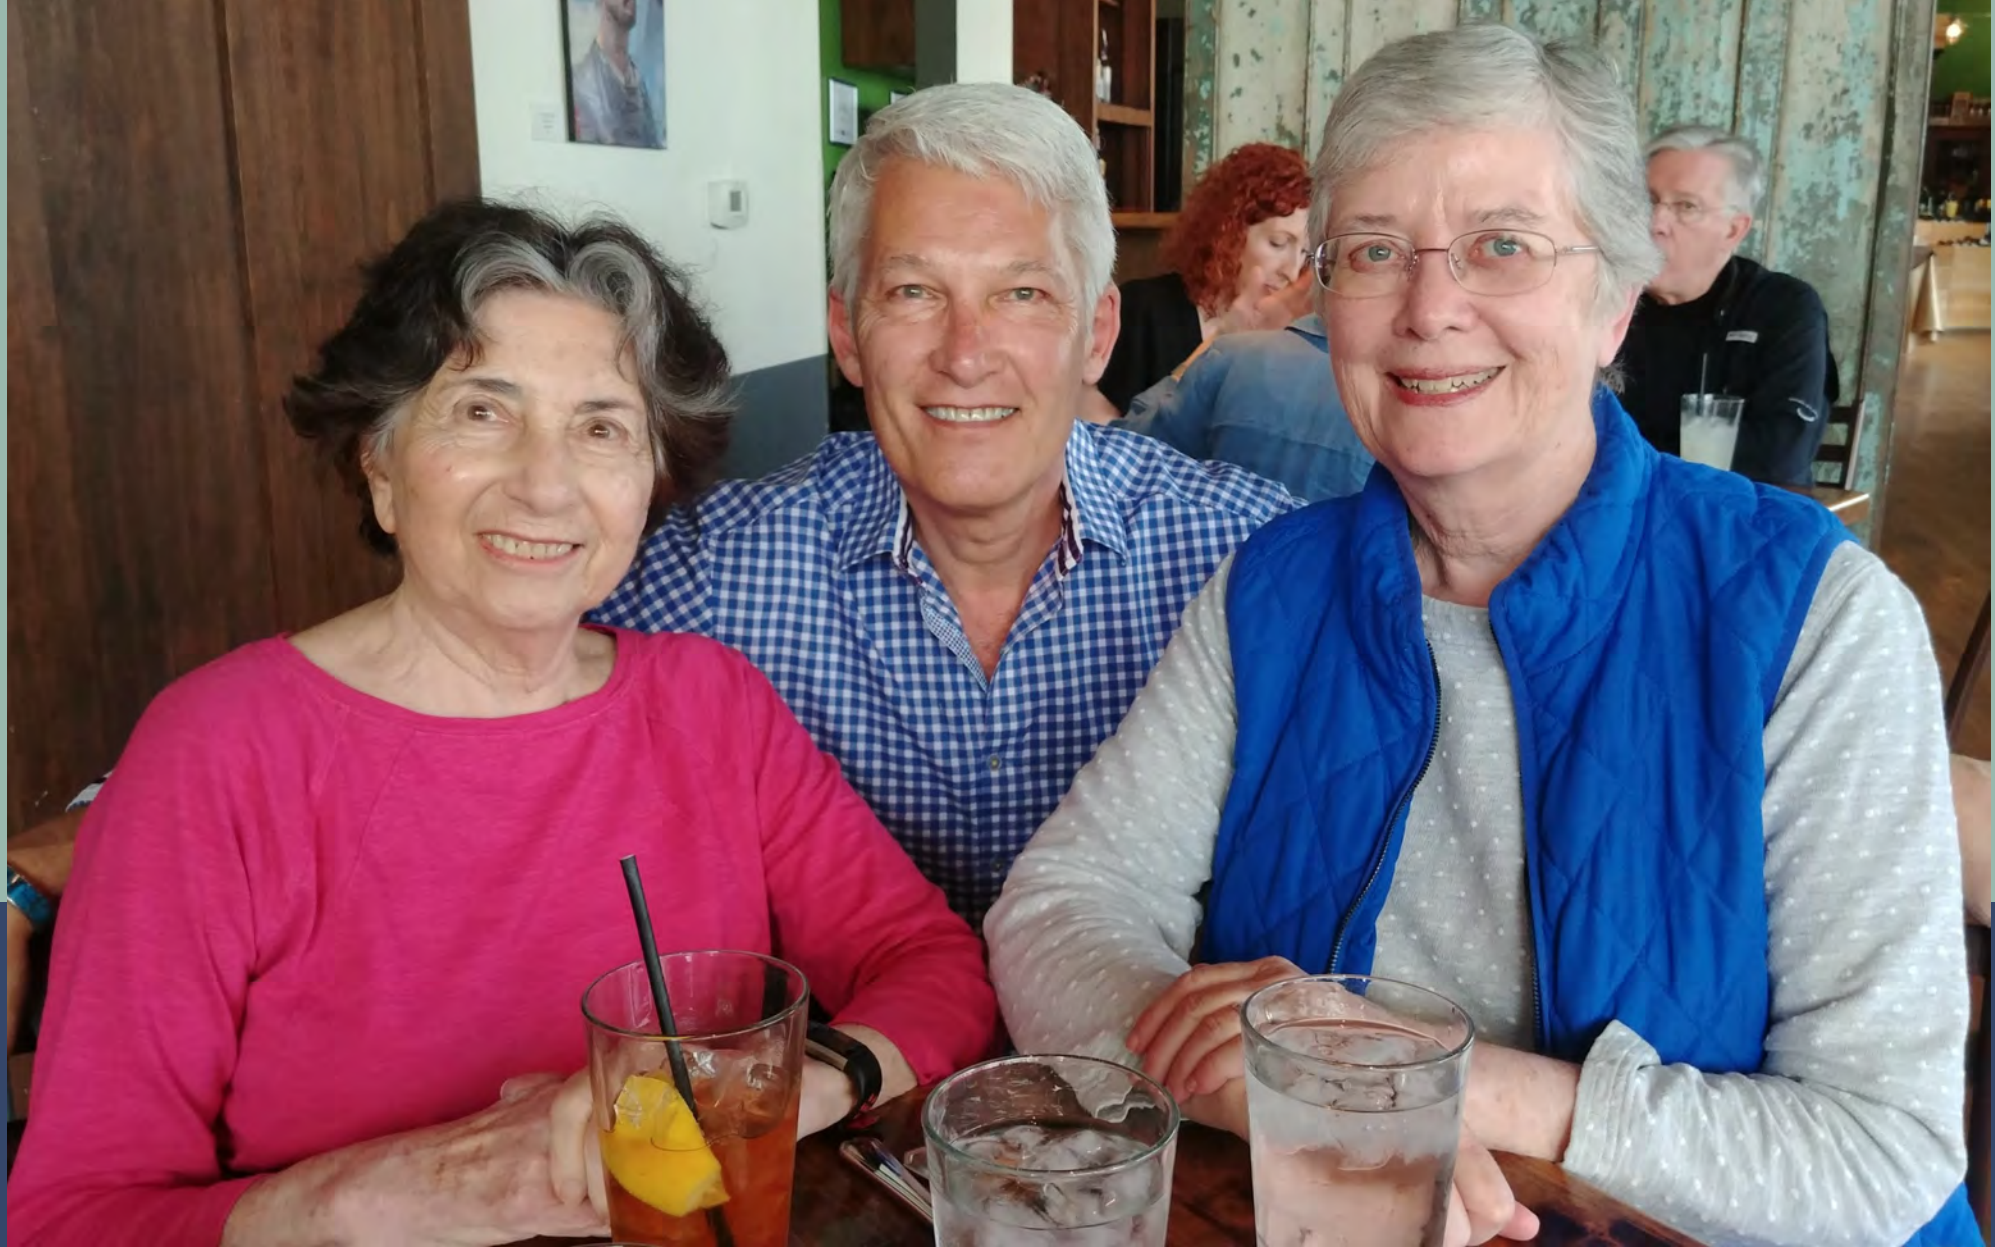

From left: Rachael K. Anderson, AHIP, FMLA, Doe Lecturer 1989; Rick B. Forsman, AHIP, FMLA, Doe Lecturer 2004; and Alison Bunting, AHIP, FMLA, Doe Lecturer, 1993



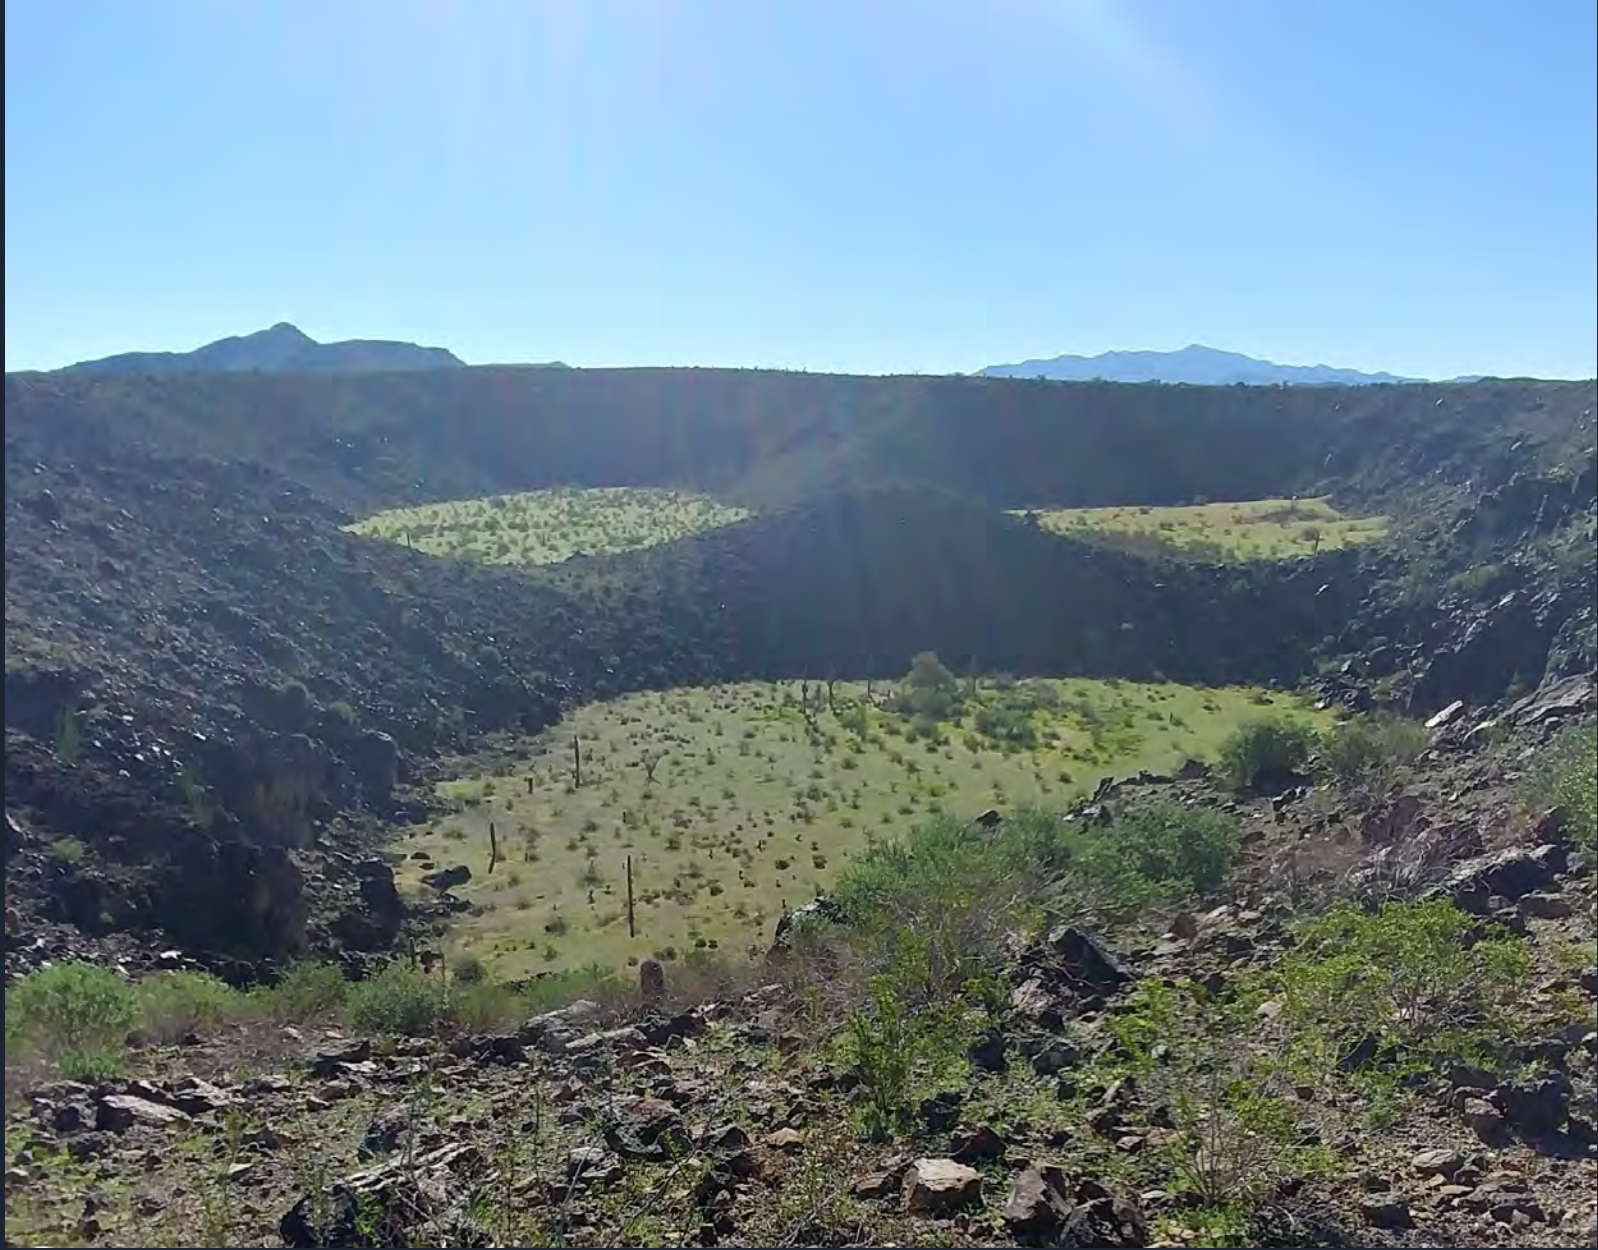

Pinocate, Sonora, Mexico



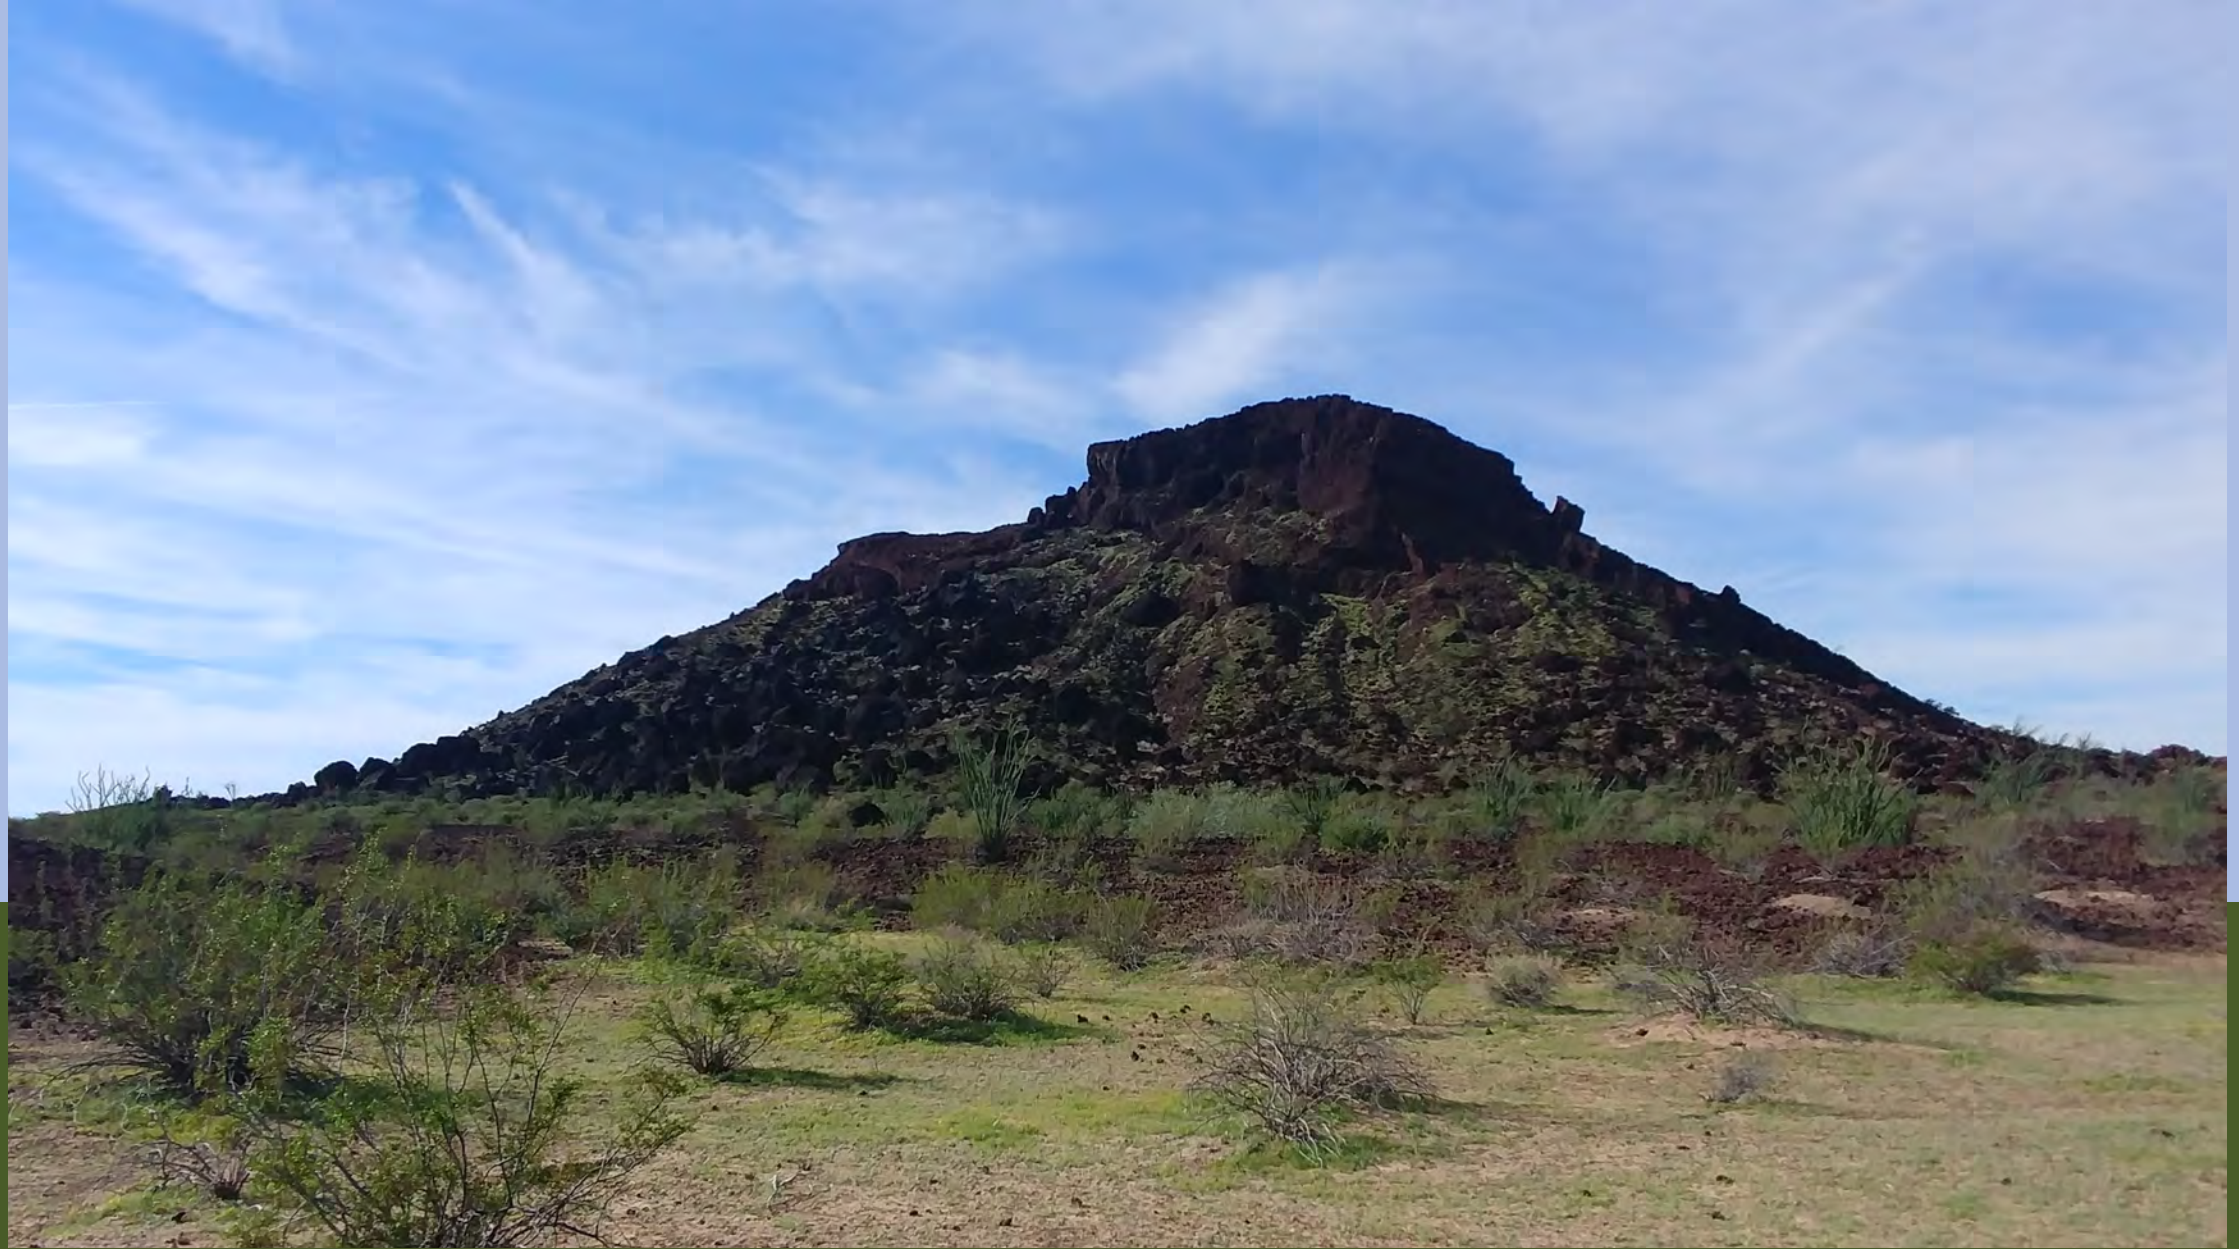

Pinacate, Sonora, Mexico



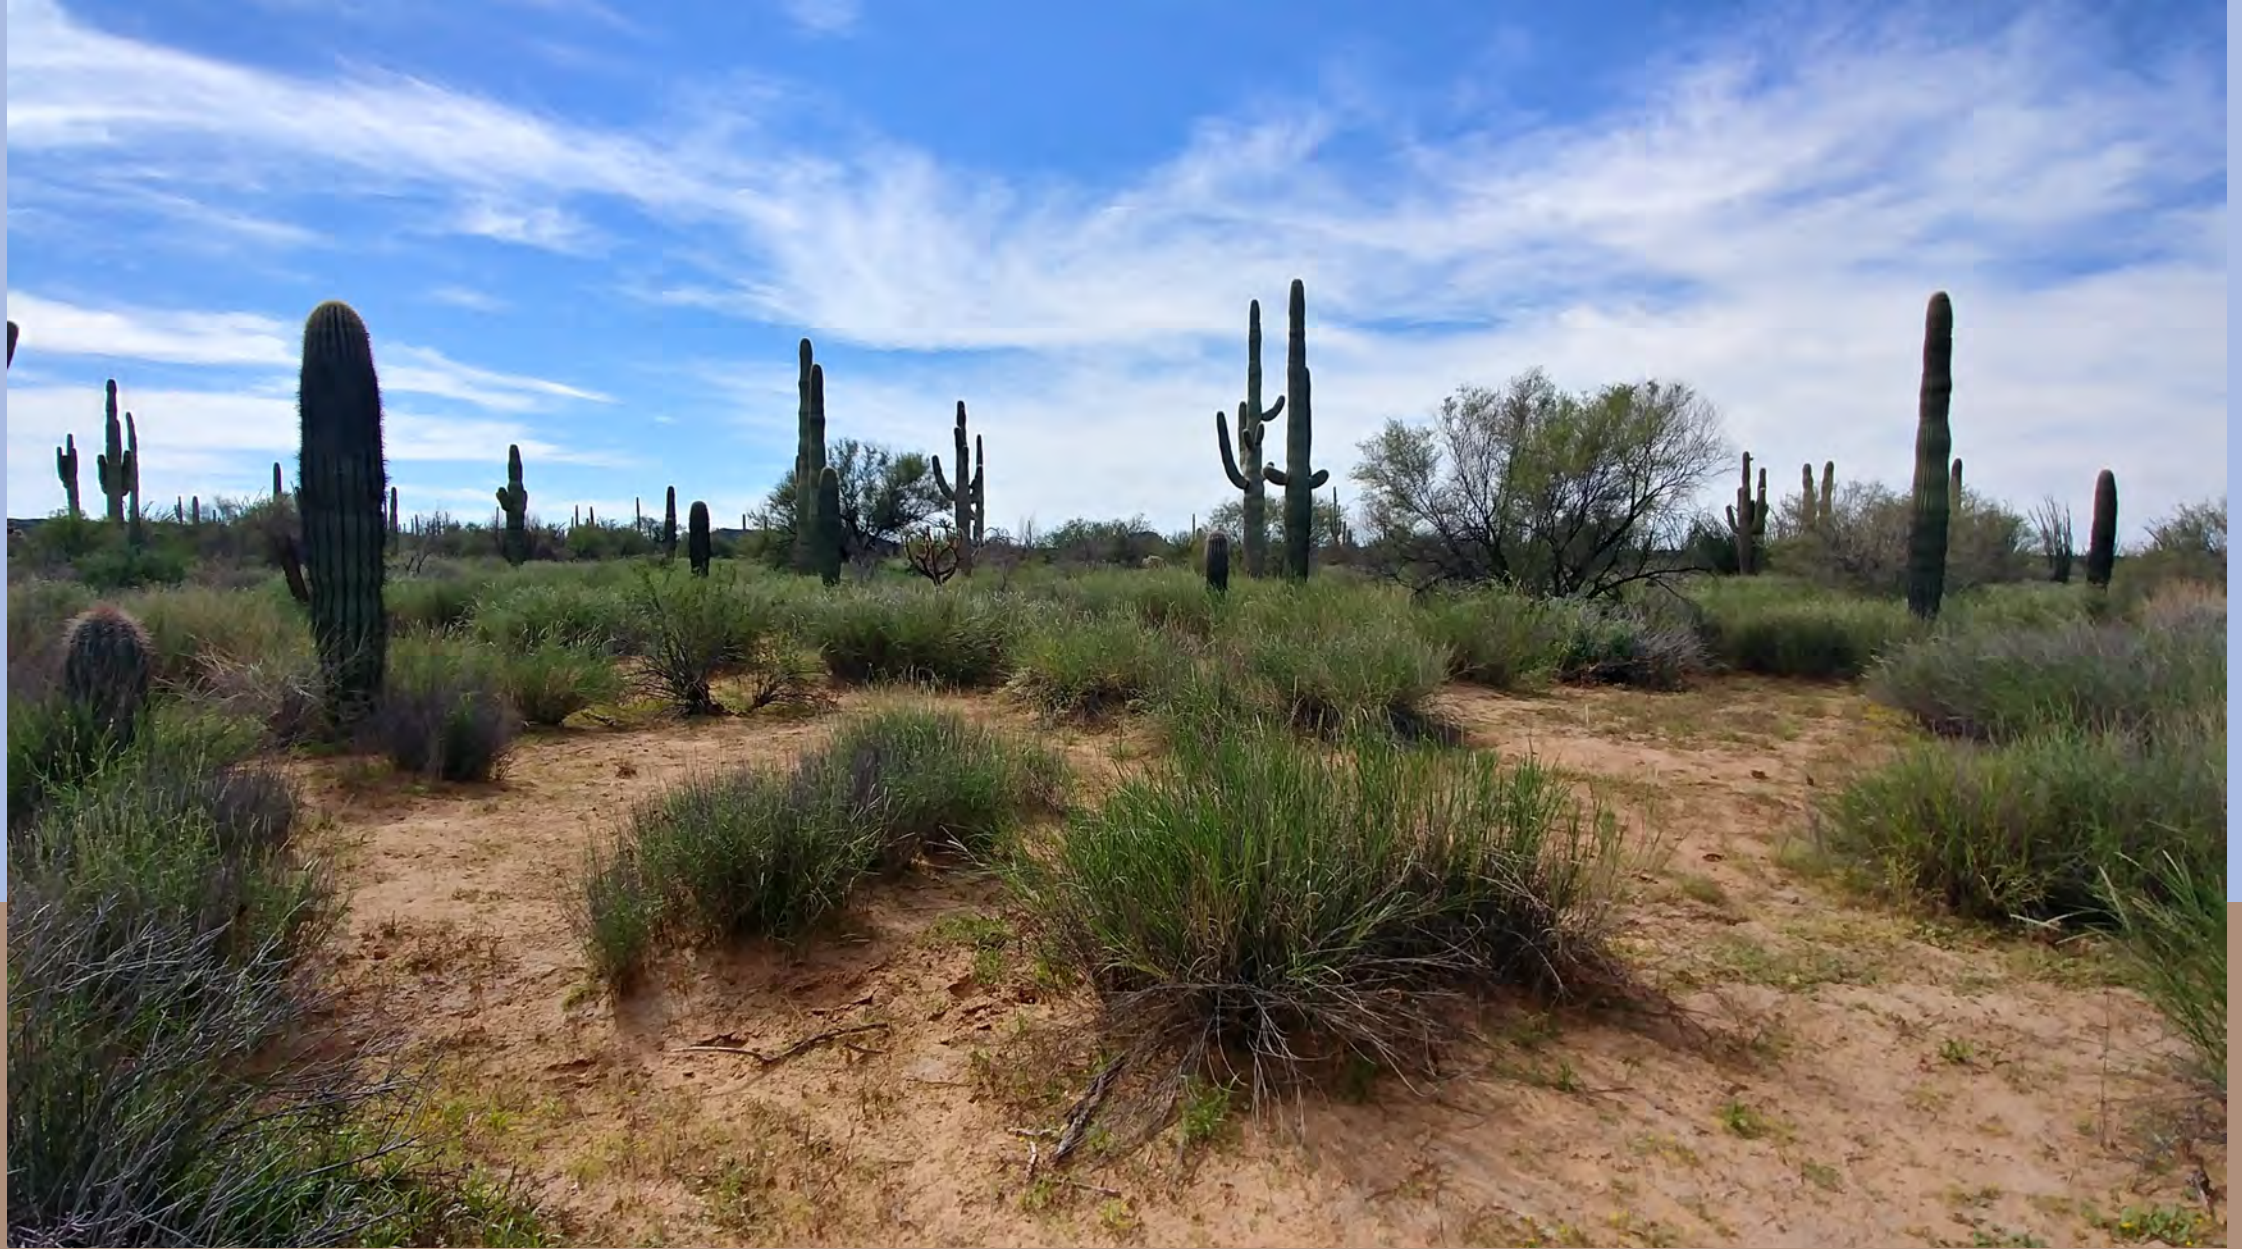

Sonoran Desert, Mexico/Arizona



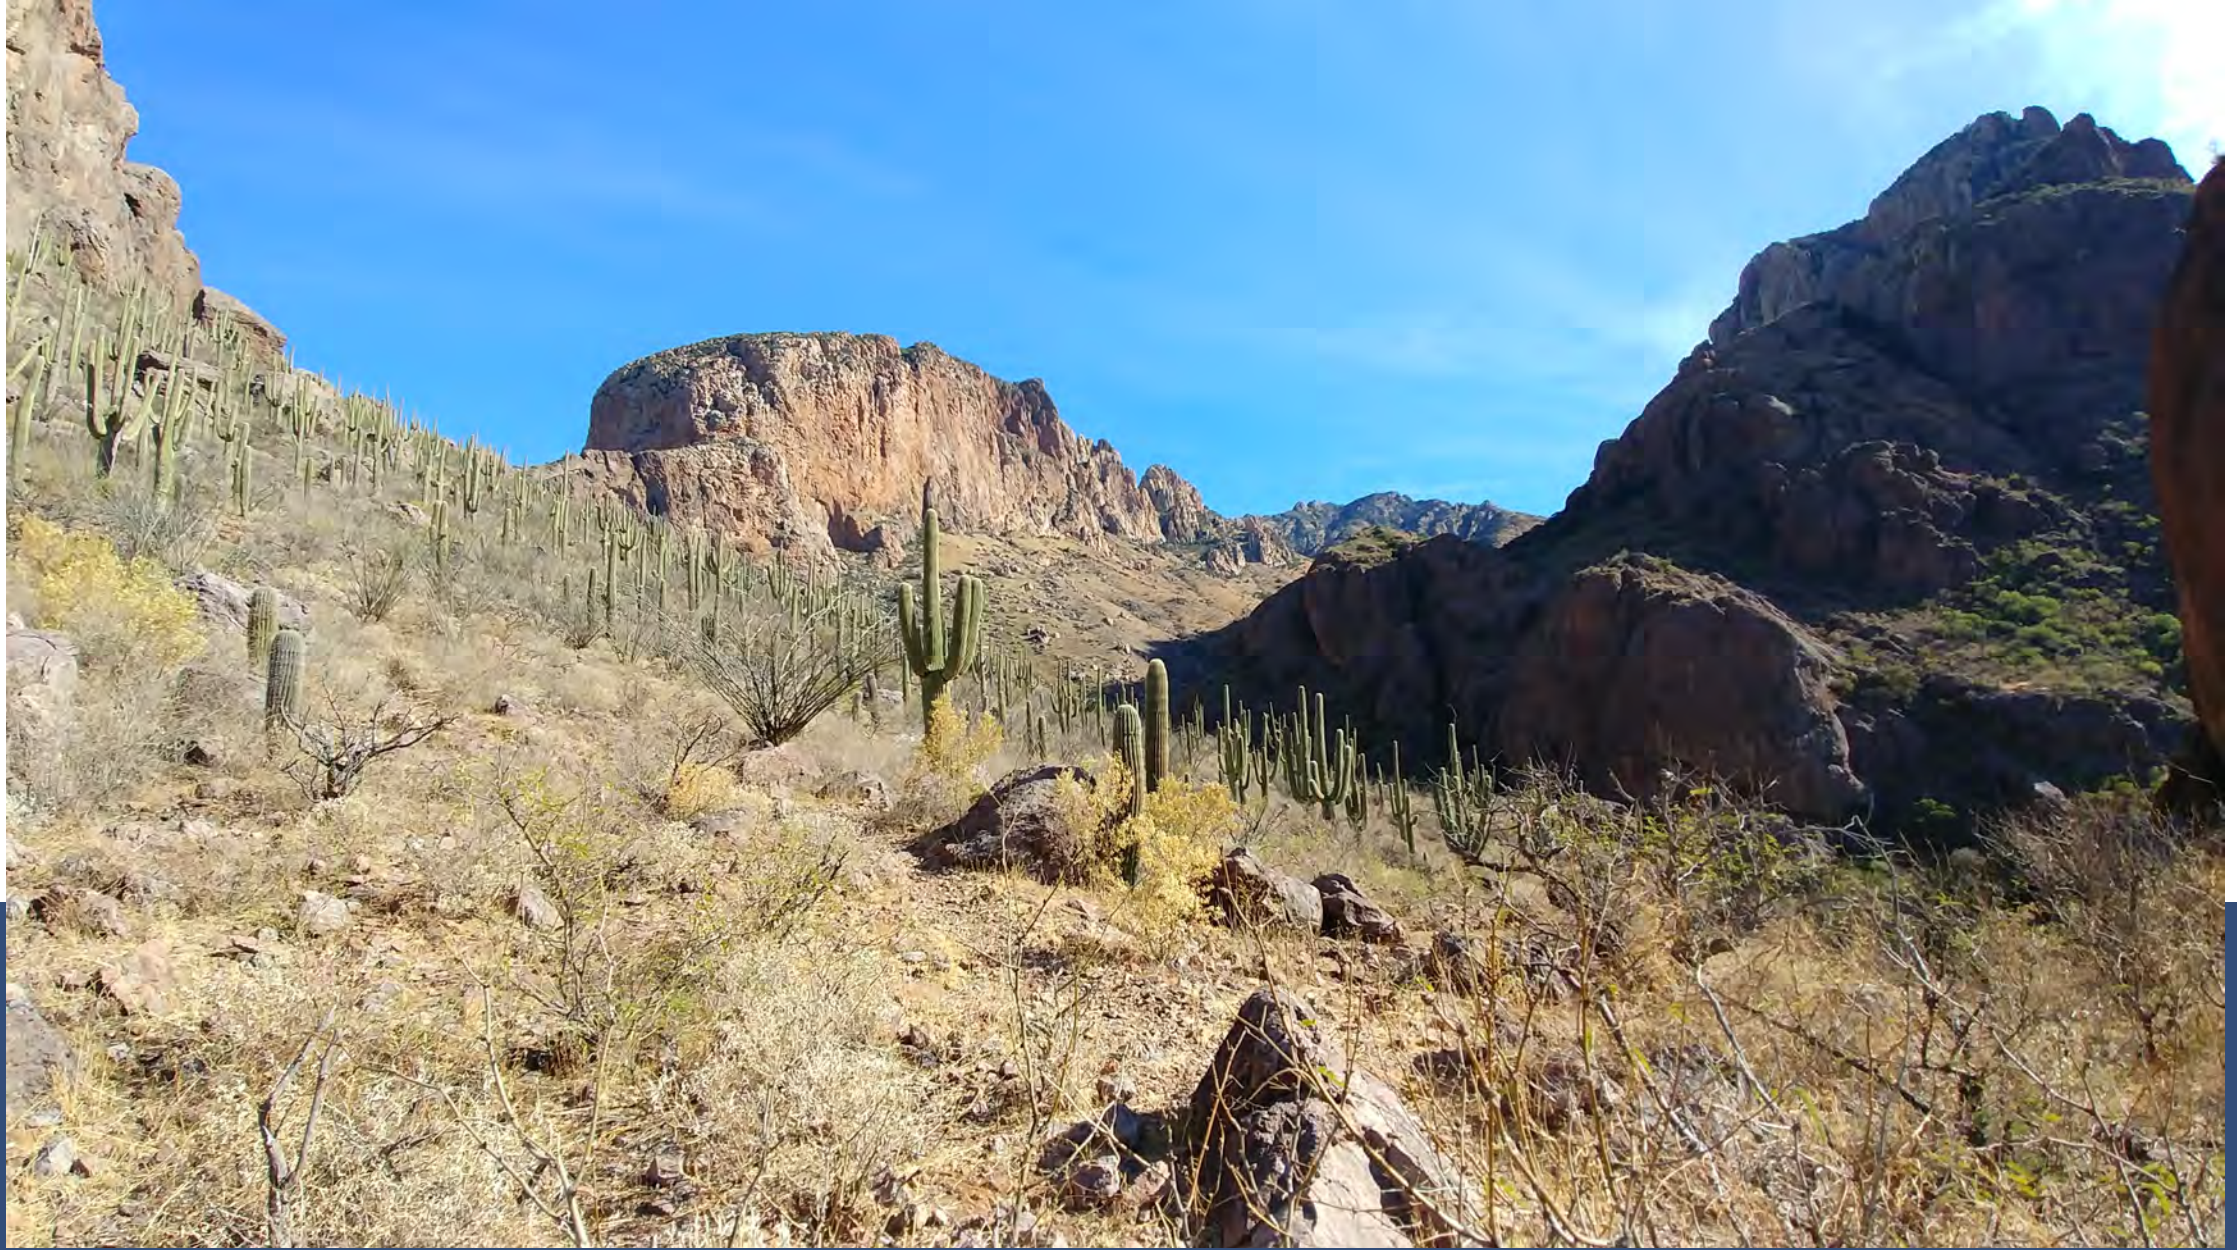

Tohono O'odham Reservation, Southern Arizona



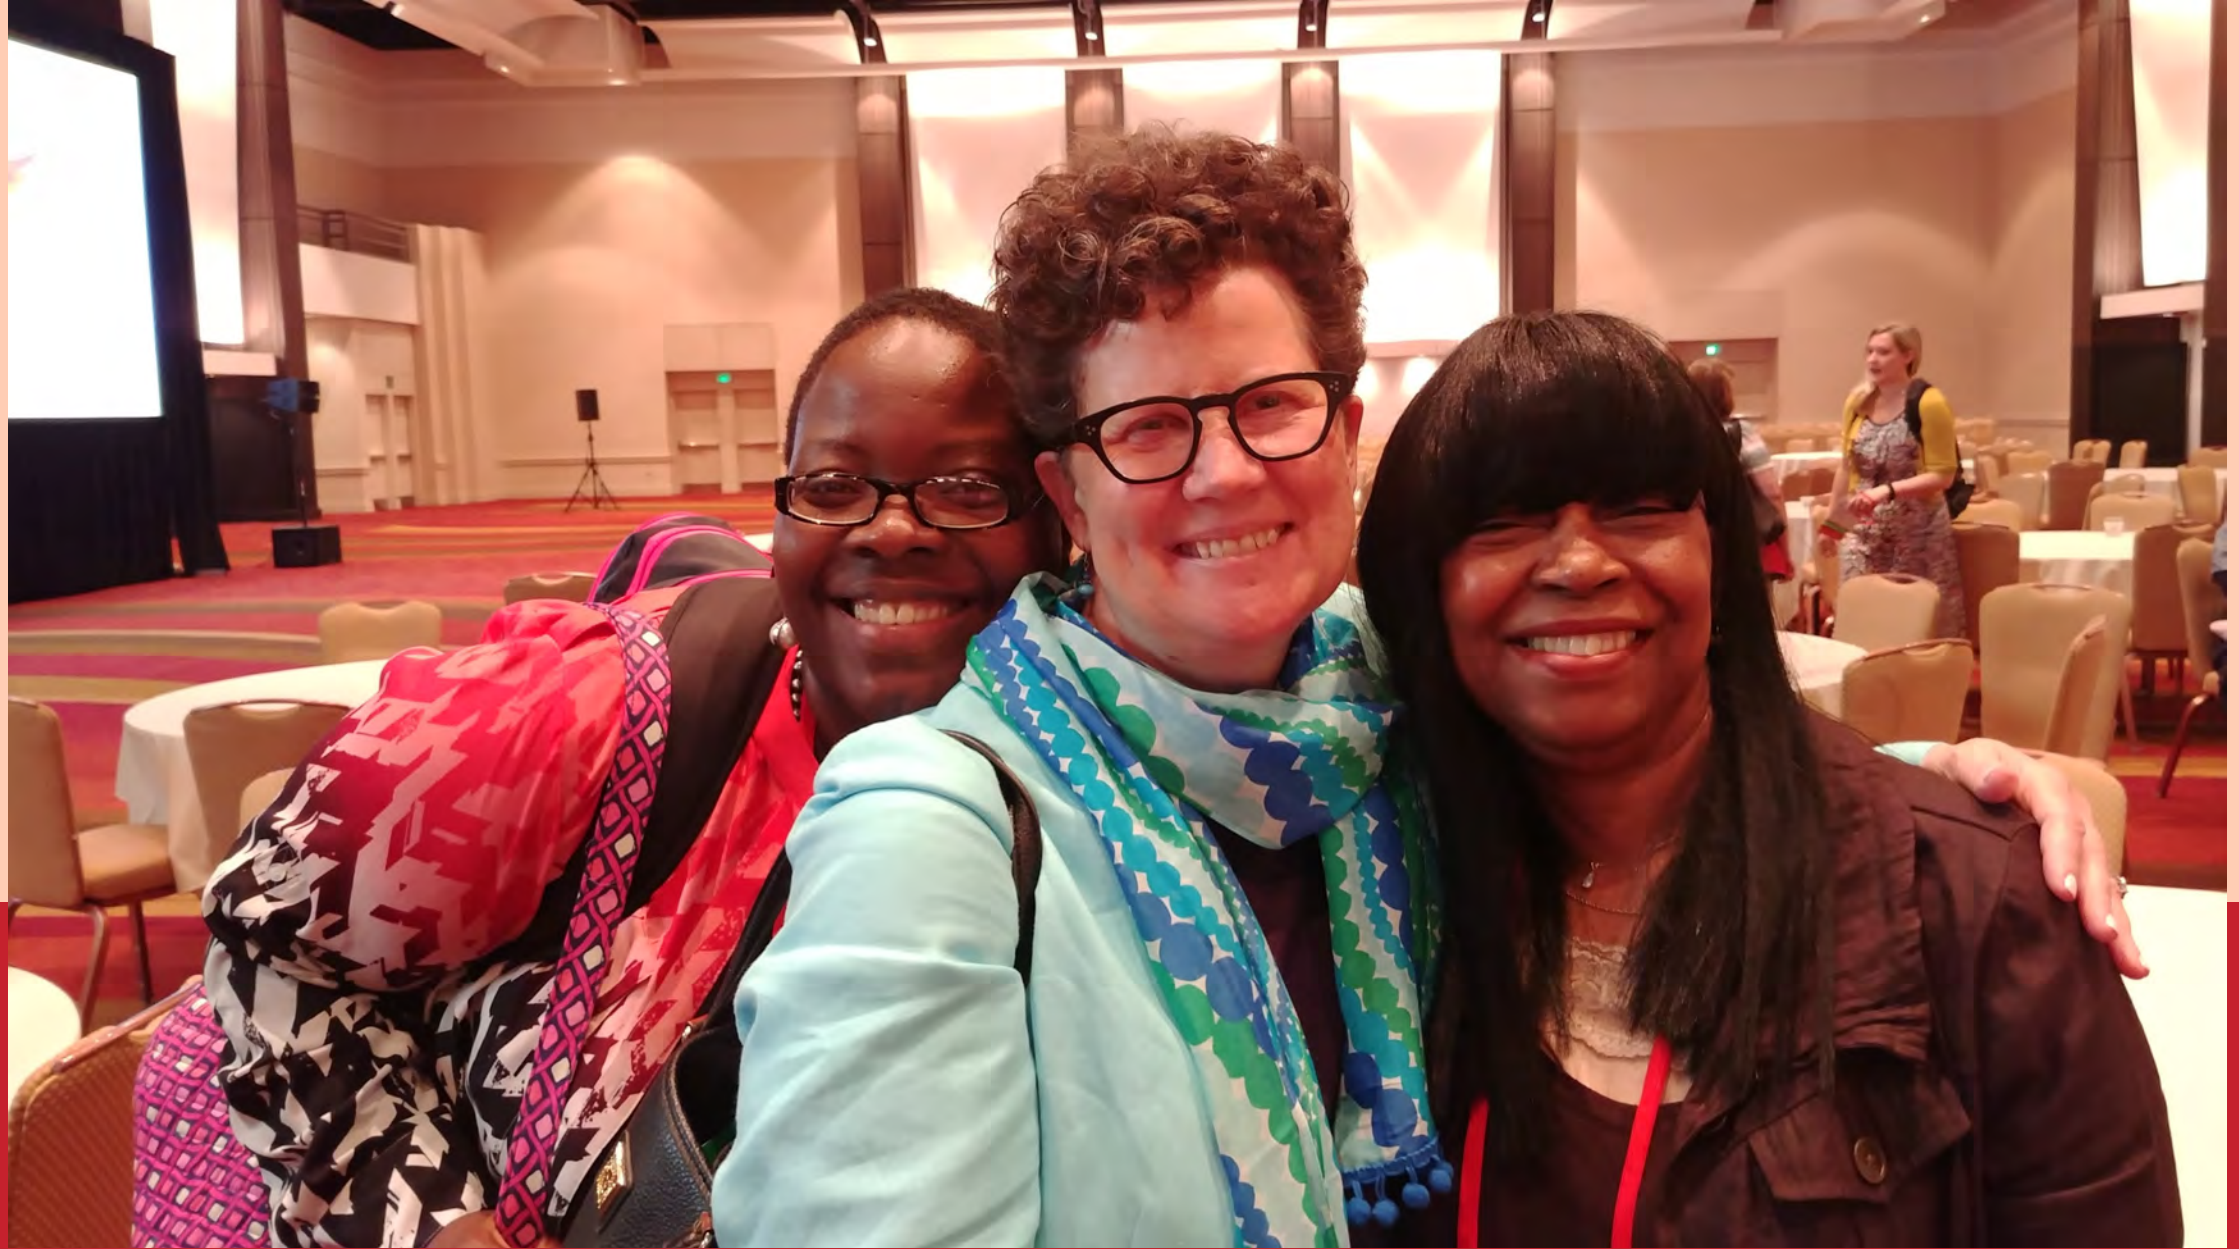

2018/19 President Beverly Murphy, AHIP, FMLA (right), with Shannon D. Jones, AHIP, and Ruth A. Riley, AHIP, at MLA '18



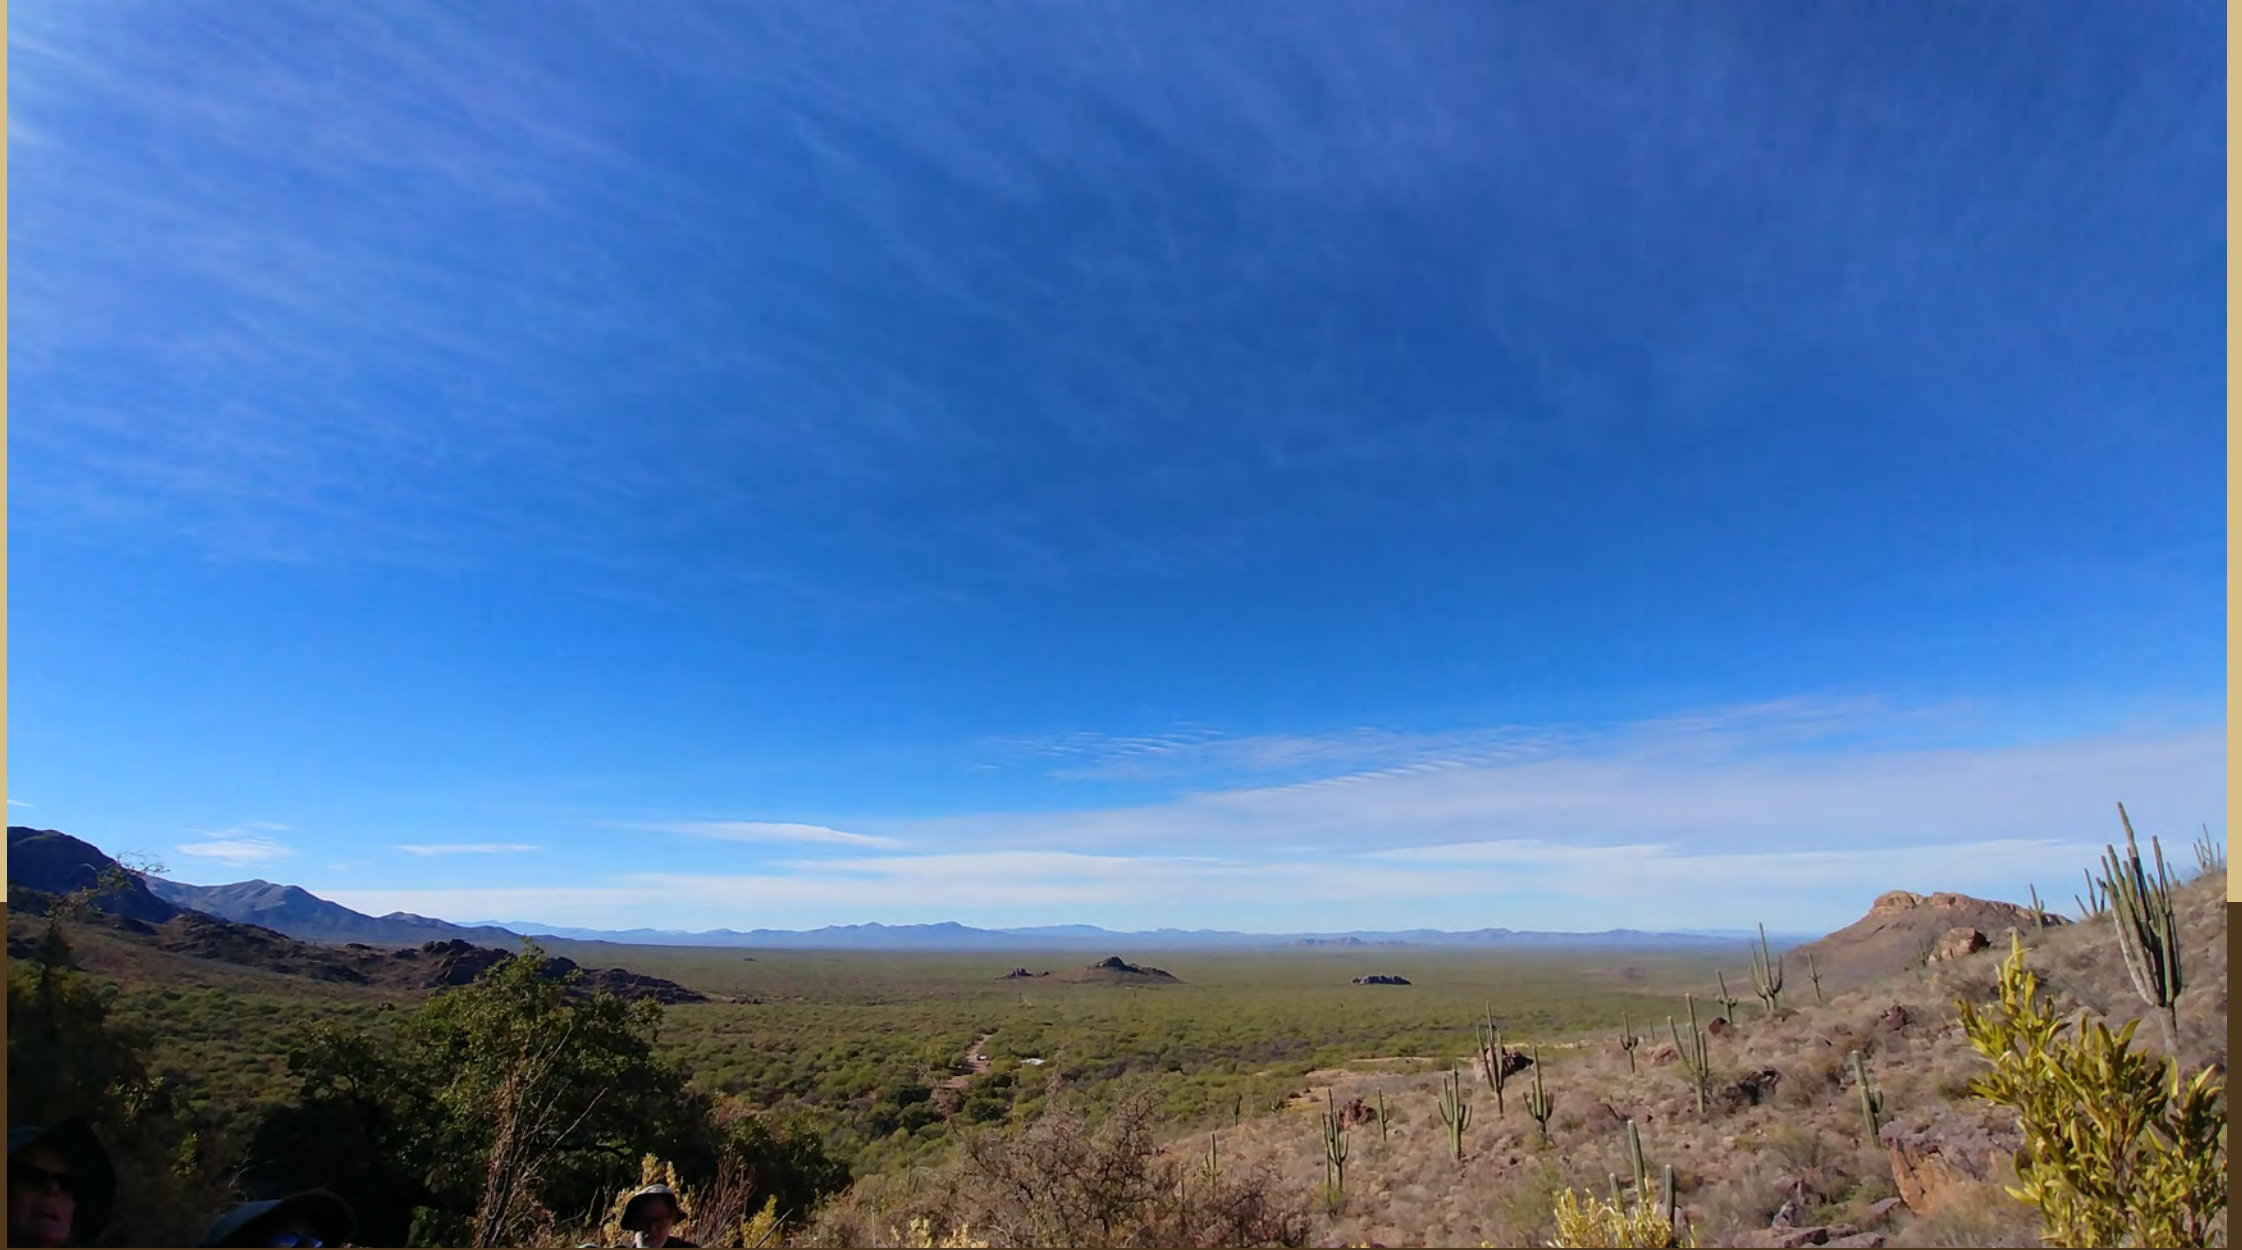

Tohono O'odham Reservation, Southern Arizona



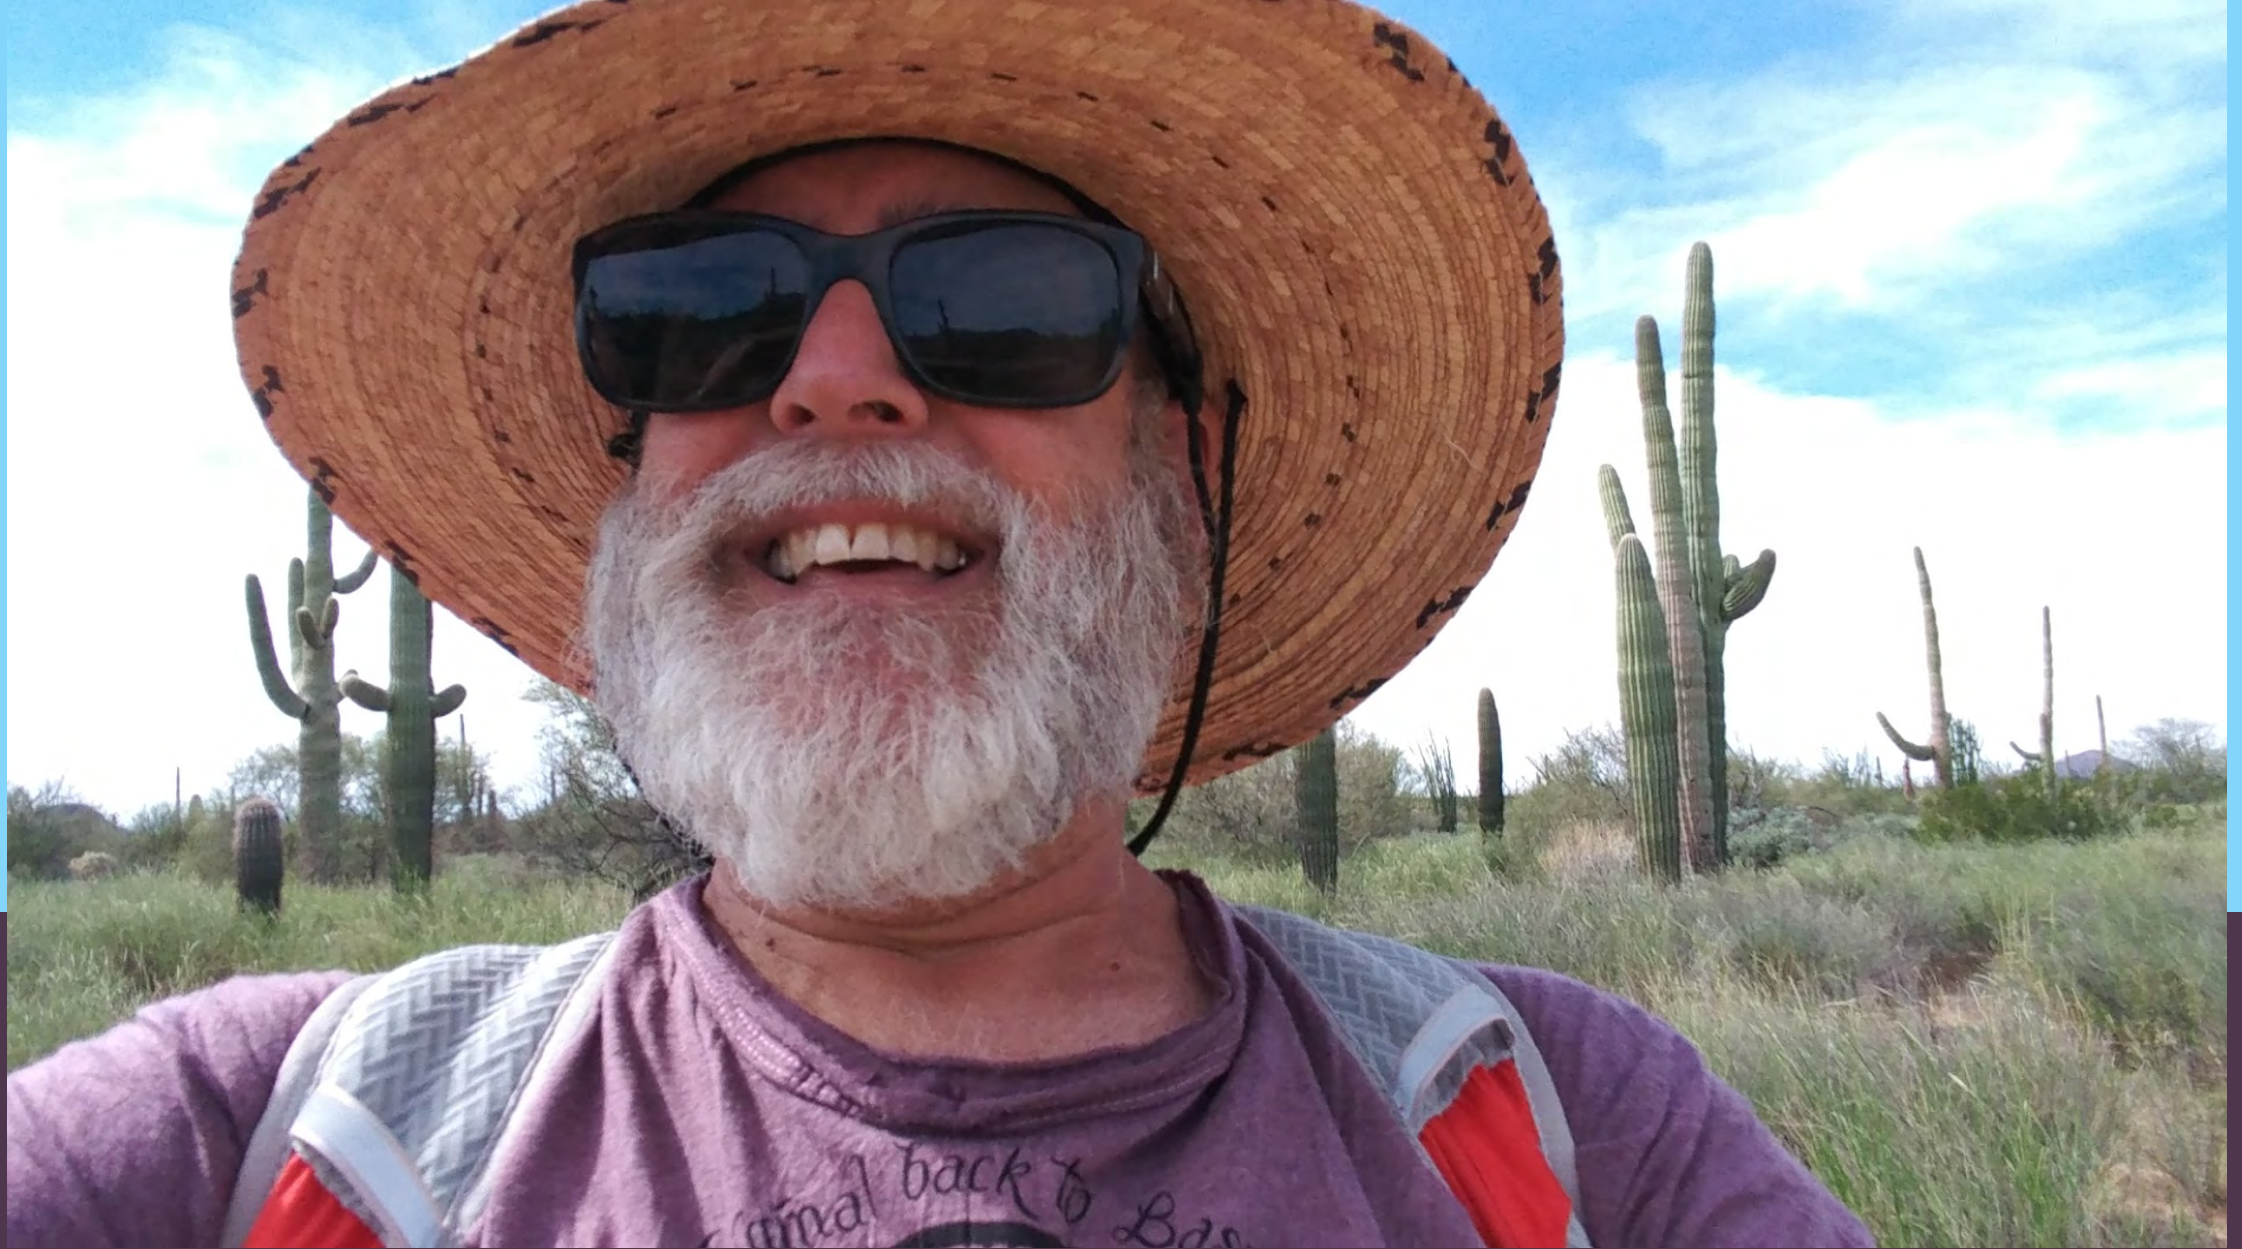

Field trip to the Pinecate, Sonora, Mexico



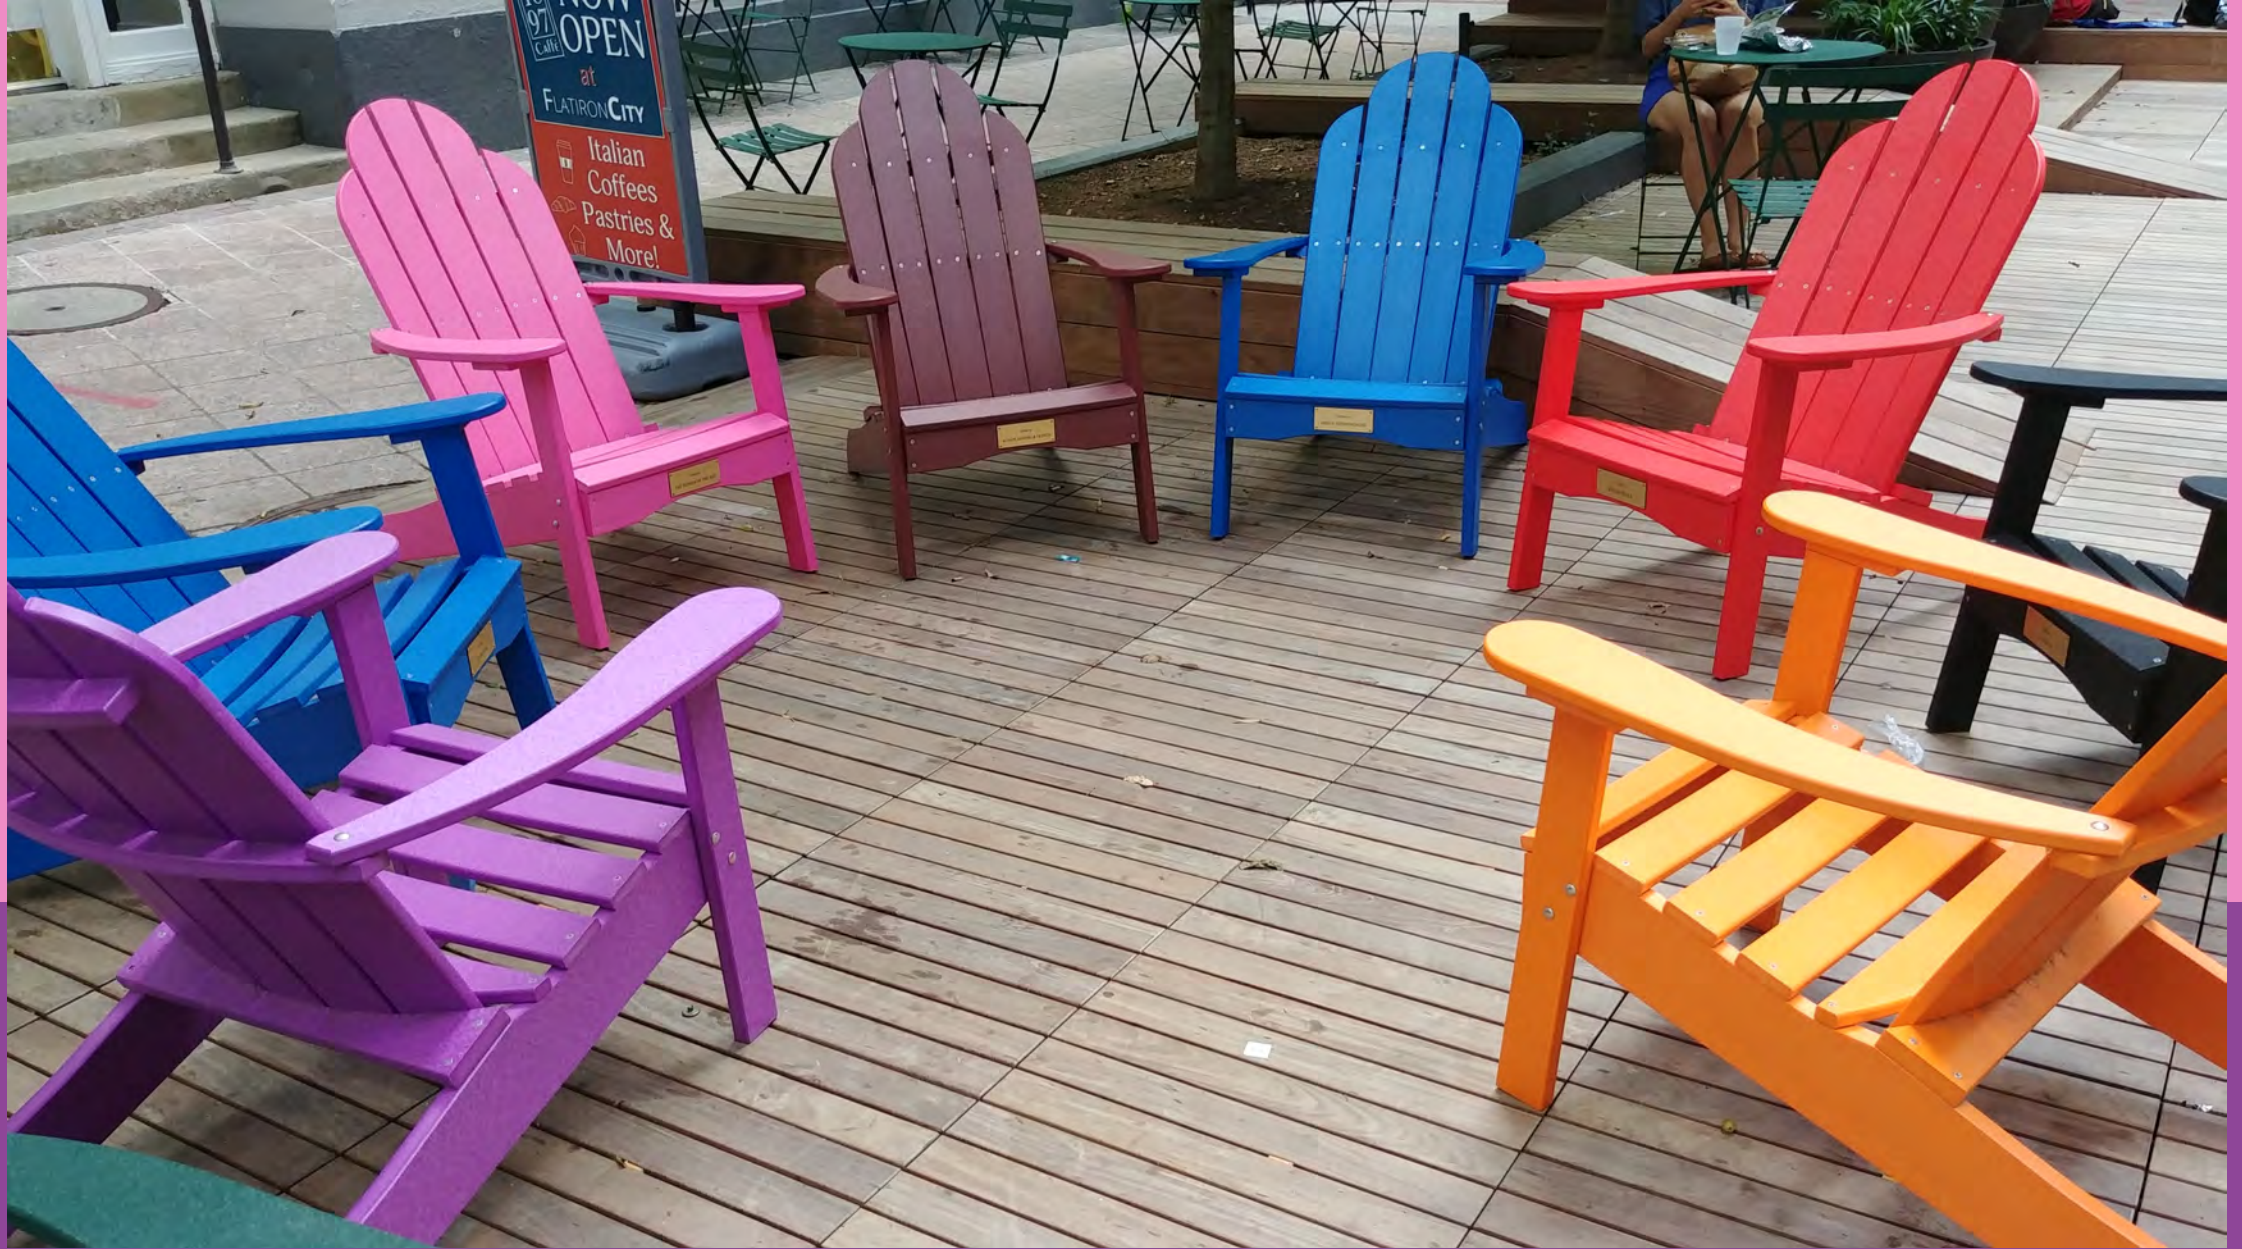

"Everybody's Welcome" rainbow chairs







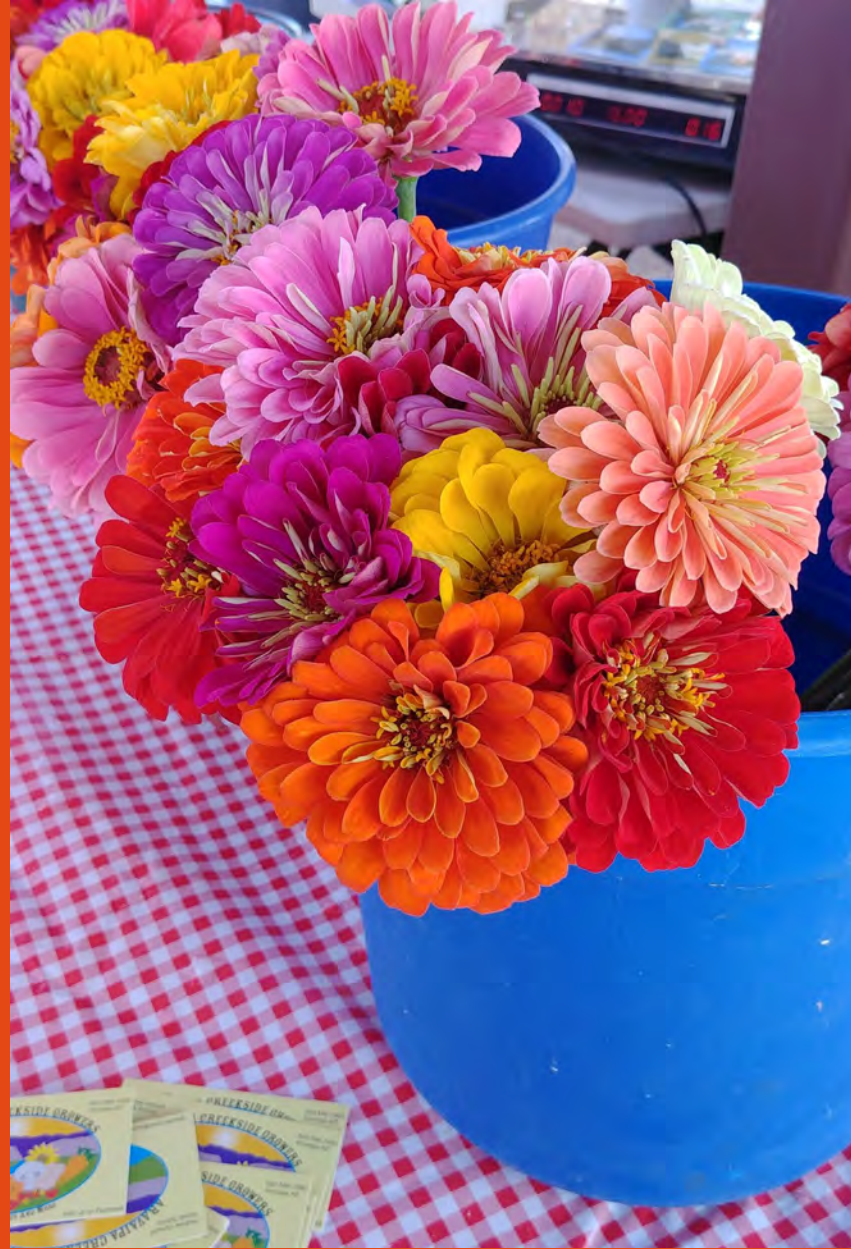

Zinnias, Farmer Market, Tucson



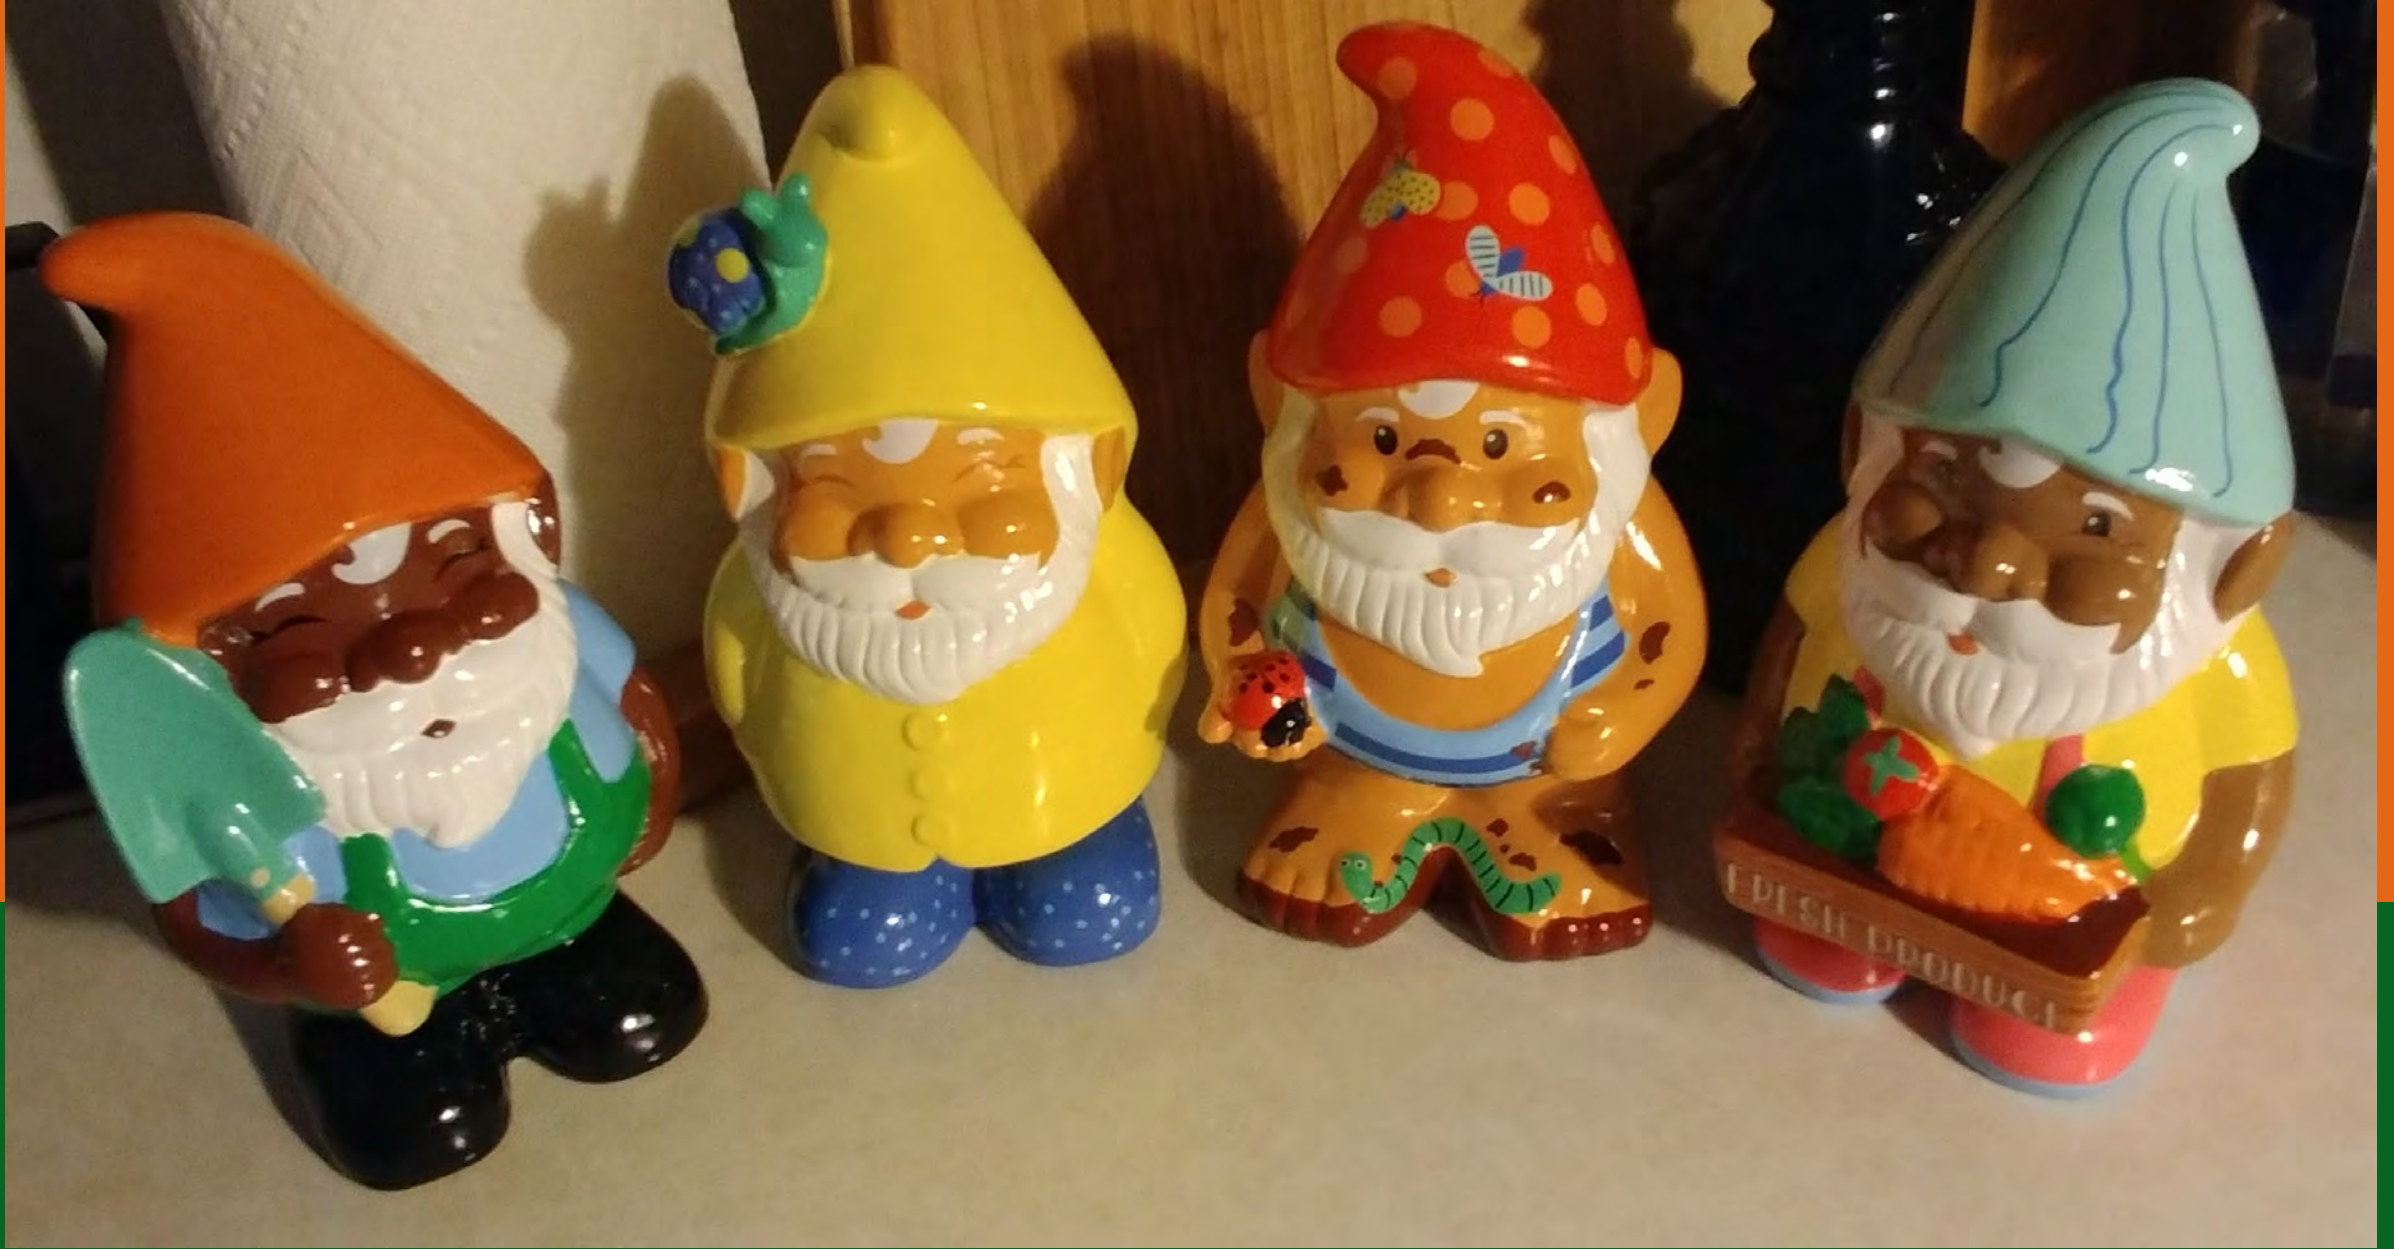

My garden gnomes



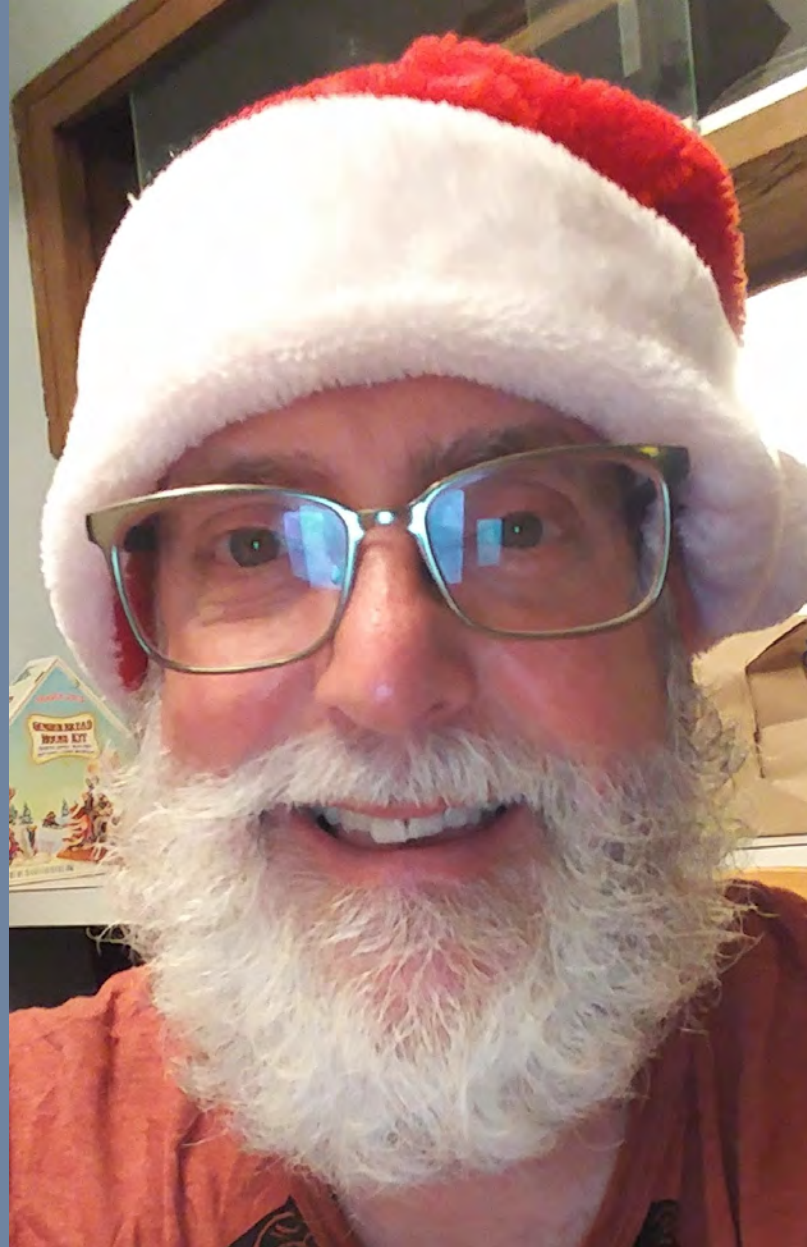

Thank You!!!
